# Supplementary material for: Using the spike protein feature to predict infection risk and monitor the evolutionary dynamic of coronavirus
Source: Infect Dis Poverty. 2020 Mar 25;9:33. doi: 10.1186/s40249-020-00649-8 (PMC7093988; doi:10.1186/s40249-020-00649-8)
Supplement: Supplementary file 1 — Additional file 1. [file 40249_2020_649_MOESM1_ESM.xlsx]

## Sheet: S_info
Phenotype	ID	Nomenclature	Location	Host	Date
H	ACJ35486	Betacoronavirus 1	Germany	Homo sapiens	1988
H	ATP16757	Betacoronavirus 1	France	Homo sapiens	2002
H	ATP16767	Betacoronavirus 1	France	Homo sapiens	2007
H	AFR79257	Human coronavirus 229E	Italy	Homo sapiens	2009
H	AFR79250	Human coronavirus 229E	Netherlands	Homo sapiens	2010
H	AGN52936	Middle East respiratory syndrome-related coronavirus	United Arab Emirates	Homo sapiens	2013
H	AID55066	Middle East respiratory syndrome-related coronavirus	Saudi Arabia	Homo sapiens	2014
H	AID55067	Middle East respiratory syndrome-related coronavirus	Saudi Arabia	Homo sapiens	2014
H	ASU45807	Middle East respiratory syndrome-related coronavirus	United Arab Emirates	Homo sapiens	2014
H	ALJ53431	Human coronavirus NL63	USA	Homo sapiens	2015
H	AOG74783	Human coronavirus 229E	Germany	Homo sapiens	2015
H	ARK08679	Betacoronavirus 1	USA	Homo sapiens	2015
H	ARU07610	Betacoronavirus 1	USA	Homo sapiens	2015
H	ARK08670	Betacoronavirus 1	USA	Homo sapiens	2015
H	ARK08627	Human coronavirus NL63	USA	Homo sapiens	2015
H	ARK08635	Betacoronavirus 1	USA	Homo sapiens	2015
H	ARK08642	Human coronavirus 229E	USA	Homo sapiens	2015
H	ARK08651	Betacoronavirus 1	USA	Homo sapiens	2015
H	ARK08661	Betacoronavirus 1	USA	Homo sapiens	2015
H	ARU07587	Betacoronavirus 1	USA	Homo sapiens	2015
H	ARU07601	Human coronavirus 229E	USA	Homo sapiens	2015
H	ARU07568	Betacoronavirus 1	USA	Homo sapiens	2015
H	ARU07594	Human coronavirus NL63	USA	Homo sapiens	2015
H	APT69890	Human coronavirus 229E	USA	Homo sapiens	2016
H	APT69883	Human coronavirus 229E	USA	Homo sapiens	2016
H	APT69869	Human coronavirus 229E	USA	Homo sapiens	2016
H	APT69849	Human coronavirus 229E	USA	Homo sapiens	2016
H	APT69876	Human coronavirus 229E	USA	Homo sapiens	2016
H	APT69862	Human coronavirus 229E	USA	Homo sapiens	2016
H	APU51916	Betacoronavirus 1	USA	Homo sapiens	2016
H	APU51926	Betacoronavirus 1	USA	Homo sapiens	2016
H	APU51936	Betacoronavirus 1	USA	Homo sapiens	2016
H	ARB07433	Betacoronavirus 1	USA	Homo sapiens	2016
H	ARB07425	Human coronavirus 229E	USA	Homo sapiens	2016
H	ARE29973	Human coronavirus NL63	USA	Homo sapiens	2016
H	ARB07608	Human coronavirus HKU1	USA	Homo sapiens	2016
H	ARA15421	Betacoronavirus 1	USA	Homo sapiens	2016
H	ARB07599	Human coronavirus HKU1	USA	Homo sapiens	2016
H	ARB07438	Human coronavirus HKU1	USA	Homo sapiens	2016
H	ARB07617	Human coronavirus HKU1	USA	Homo sapiens	2016
H	ARB07414	Betacoronavirus 1	USA	Homo sapiens	2016
H	ARB07406	Human coronavirus NL63	USA	Homo sapiens	2016
H	ARK08620	Human coronavirus 229E	USA	Homo sapiens	2016
H	ARE29961	Human coronavirus NL63	USA	Homo sapiens	2016
H	ARE29990	Betacoronavirus 1	USA	Homo sapiens	2016
H	ARE30017	Betacoronavirus 1	USA	Homo sapiens	2016
H	ARE29999	Betacoronavirus 1	USA	Homo sapiens	2016
H	ARE30008	Betacoronavirus 1	USA	Homo sapiens	2016
H	ARE29985	Human coronavirus NL63	USA	Homo sapiens	2016
H	ARE29979	Human coronavirus NL63	USA	Homo sapiens	2016
H	ARE29967	Human coronavirus NL63	USA	Homo sapiens	2016
H	ARB07420	Betacoronavirus 1	USA	Homo sapiens	2016
H	ARB07399	Human coronavirus NL63	USA	Homo sapiens	2016
H	ARB07392	Human coronavirus 229E	USA	Homo sapiens	2016
H	ARA15429	Human coronavirus 229E	USA	Homo sapiens	2016
H	APT69856	Human coronavirus 229E	USA	Homo sapiens	2016
H	AZS52618	Human coronavirus HKU1	USA	Homo sapiens	2017
H	QEO75985	Human coronavirus 229E	USA	Homo sapiens	2018
H	QEG03731	Human coronavirus NL63	USA	Homo sapiens	2018
H	QEG03757	Betacoronavirus 1	USA	Homo sapiens	2019
H	QEG03785	Human coronavirus 229E	USA	Homo sapiens	2019
H	QEG03794	Betacoronavirus 1	USA	Homo sapiens	2019
H	QEG03814	Betacoronavirus 1	USA	Homo sapiens	2019
H	QEG03803	Betacoronavirus 1	USA	Homo sapiens	2019
H	QEG03748	Human coronavirus NL63	USA	Homo sapiens	2019
H	QEG03740	Betacoronavirus 1	USA	Homo sapiens	2019
H	QEG03776	Betacoronavirus 1	USA	Homo sapiens	2019
H	QEG03767	Betacoronavirus 1	USA	Homo sapiens	2019
H	AGT51366	Human coronavirus NL63	USA	Homo sapiens	1983-08-16
H	AGT51412	Betacoronavirus 1	USA	Homo sapiens	1985-01-08
H	AGT51660	Betacoronavirus 1	USA	Homo sapiens	1987-01-22
H	AGT51670	Betacoronavirus 1	USA	Homo sapiens	1987-02-10
H	AGT51680	Betacoronavirus 1	USA	Homo sapiens	1987-03-05
H	AGT51580	Betacoronavirus 1	USA	Homo sapiens	1987-03-12
H	AGT51640	Betacoronavirus 1	USA	Homo sapiens	1987-03-17
H	AGT51338	Human coronavirus NL63	USA	Homo sapiens	1987-12-16
H	AGT51394	Human coronavirus NL63	USA	Homo sapiens	1989-01-03
H	AGT51352	Human coronavirus NL63	USA	Homo sapiens	1989-01-05
H	AGT51541	Betacoronavirus 1	USA	Homo sapiens	1989-12-21
H	AGT51373	Human coronavirus NL63	USA	Homo sapiens	1990-01-05
H	AGT51471	Betacoronavirus 1	USA	Homo sapiens	1990-01-16
H	AGT51461	Betacoronavirus 1	USA	Homo sapiens	1990-01-17
H	AGT51422	Betacoronavirus 1	USA	Homo sapiens	1990-01-19
H	AGT51690	Betacoronavirus 1	USA	Homo sapiens	1990-01-23
H	AGT51359	Human coronavirus NL63	USA	Homo sapiens	1990-03-21
H	AGT51324	Human coronavirus NL63	USA	Homo sapiens	1990-04-26
H	AGT51387	Human coronavirus NL63	USA	Homo sapiens	1990-05-29
H	AGT51570	Betacoronavirus 1	USA	Homo sapiens	1991-01-03
H	AGT51770	Betacoronavirus 1	USA	Homo sapiens	1991-01-15
H	AGT51720	Betacoronavirus 1	USA	Homo sapiens	1991-01-24
H	AGT51345	Human coronavirus NL63	USA	Homo sapiens	1991-01-24
H	AGT51700	Betacoronavirus 1	USA	Homo sapiens	1991-01-29
H	AGT51760	Betacoronavirus 1	USA	Homo sapiens	1991-02-05
H	AGT51481	Betacoronavirus 1	USA	Homo sapiens	1991-02-07
H	AGT51630	Betacoronavirus 1	USA	Homo sapiens	1991-02-07
H	AGT51750	Betacoronavirus 1	USA	Homo sapiens	1991-02-22
H	AGT51600	Betacoronavirus 1	USA	Homo sapiens	1991-03-14
H	AGT51521	Betacoronavirus 1	USA	Homo sapiens	1992-05-04
H	AGT51780	Betacoronavirus 1	USA	Homo sapiens	1992-11-30
H	AGT51551	Betacoronavirus 1	USA	Homo sapiens	1992-12-16
H	AGT51710	Betacoronavirus 1	USA	Homo sapiens	1993-01-26
H	AGT21360	Human coronavirus 229E	USA	Homo sapiens	1993-02-22
H	AGT21367	Human coronavirus 229E	USA	Homo sapiens	1993-03-11
H	AGT21345	Human coronavirus 229E	USA	Homo sapiens	1993-03-18
H	AGT51650	Betacoronavirus 1	USA	Homo sapiens	1995-01-12
H	AGT51561	Betacoronavirus 1	USA	Homo sapiens	1995-03-09
H	AGT51790	Betacoronavirus 1	USA	Homo sapiens	1996-05-10
H	AGT51451	Betacoronavirus 1	USA	Homo sapiens	1996-12-04
H	AGT51590	Betacoronavirus 1	USA	Homo sapiens	1996-12-17
H	AGT51441	Betacoronavirus 1	USA	Homo sapiens	1996-12-30
H	AGT51800	Betacoronavirus 1	USA	Homo sapiens	1997-01-02
H	AGT51531	Betacoronavirus 1	USA	Homo sapiens	1997-12-11
H	AGT51610	Betacoronavirus 1	USA	Homo sapiens	1997-12-18
H	AGT51501	Betacoronavirus 1	USA	Homo sapiens	1998-02-05
H	AGT51620	Betacoronavirus 1	USA	Homo sapiens	1999-01-07
H	AGT51511	Betacoronavirus 1	USA	Homo sapiens	1999-01-15
H	AGT51491	Betacoronavirus 1	USA	Homo sapiens	2000-07-27
H	AGT51730	Betacoronavirus 1	USA	Homo sapiens	2000-08-08
H	AGT51331	Human coronavirus NL63	USA	Homo sapiens	2001-02-23
H	AGT51380	Human coronavirus NL63	USA	Homo sapiens	2001-11-21
H	ADC35483	Severe acute respiratory syndrome-related coronavirus	China	Homo sapiens	2003-06-07
H	ADC35497	Severe acute respiratory syndrome-related coronavirus	China	Homo sapiens	2003-06-07
H	ACQ82725	Severe acute respiratory syndrome-related coronavirus	USA	Homo sapiens	2004-08-10
H	AEN19358	Betacoronavirus 1	China	Homo sapiens	2004-11-01
H	AEN19366	Betacoronavirus 1	China	Homo sapiens	2004-11-01
H	AFD98785	Human coronavirus NL63	USA	Homo sapiens	2005-01-11
H	AFD98792	Human coronavirus NL63	USA	Homo sapiens	2005-01-18
H	AFD98799	Human coronavirus NL63	USA	Homo sapiens	2005-01-19
H	AFD98806	Human coronavirus NL63	USA	Homo sapiens	2005-01-23
H	AFD98813	Human coronavirus NL63	USA	Homo sapiens	2005-02-01
H	ADN03339	Human coronavirus HKU1	France	Homo sapiens	2005-03-04
H	AFD98820	Human coronavirus NL63	USA	Homo sapiens	2005-04-12
H	AIV41891	Betacoronavirus 1	China	Homo sapiens	2005-06-01
H	AFD98827	Human coronavirus NL63	USA	Homo sapiens	2005-11-01
H	AFD98834	Human coronavirus NL63	USA	Homo sapiens	2005-11-21
H	AIV41795	Betacoronavirus 1	China	Homo sapiens	2006-03-01
H	AIV41855	Betacoronavirus 1	China	Homo sapiens	2006-09-01
H	AIV41861	Betacoronavirus 1	China	Homo sapiens	2006-10-01
H	AIV41801	Betacoronavirus 1	China	Homo sapiens	2007-04-01
H	AIV41807	Betacoronavirus 1	China	Homo sapiens	2007-05-01
H	AIV41813	Betacoronavirus 1	China	Homo sapiens	2007-05-01
H	AIV41825	Betacoronavirus 1	China	Homo sapiens	2007-05-01
H	AIV41903	Betacoronavirus 1	China	Homo sapiens	2007-05-01
H	AIV41987	Betacoronavirus 1	China	Homo sapiens	2007-05-01
H	AIV41867	Betacoronavirus 1	China	Homo sapiens	2007-06-01
H	AIV41909	Betacoronavirus 1	China	Homo sapiens	2007-06-01
H	AIV41915	Betacoronavirus 1	China	Homo sapiens	2007-06-01
H	AIV41921	Betacoronavirus 1	China	Homo sapiens	2007-06-01
H	AIV41927	Betacoronavirus 1	China	Homo sapiens	2007-06-01
H	AIV41933	Betacoronavirus 1	China	Homo sapiens	2007-06-01
H	AIV41939	Betacoronavirus 1	China	Homo sapiens	2007-06-01
H	AIV41945	Betacoronavirus 1	China	Homo sapiens	2007-06-01
H	AIV41951	Betacoronavirus 1	China	Homo sapiens	2007-06-01
H	AIV41957	Betacoronavirus 1	China	Homo sapiens	2007-06-01
H	AIV41963	Betacoronavirus 1	China	Homo sapiens	2007-06-01
H	AIV41975	Betacoronavirus 1	China	Homo sapiens	2007-07-01
H	AIV41981	Betacoronavirus 1	China	Homo sapiens	2007-07-01
H	AFD98771	Human coronavirus NL63	USA	Homo sapiens	2008-01-08
H	AIV41999	Betacoronavirus 1	China	Homo sapiens	2008-10-01
H	AFO70497	Human coronavirus NL63	China	Homo sapiens	2008-11-04
H	AFQ55884	Human coronavirus NL63	China	Homo sapiens	2009-01-24
H	AFD98764	Human coronavirus NL63	USA	Homo sapiens	2009-02-13
H	AFD98757	Human coronavirus NL63	USA	Homo sapiens	2009-03-01
H	AIV41993	Betacoronavirus 1	China	Homo sapiens	2009-03-01
H	AFD98778	Human coronavirus NL63	USA	Homo sapiens	2009-03-12
H	AFD98750	Human coronavirus NL63	USA	Homo sapiens	2009-03-16
H	ACT11030	Betacoronavirus 1		Homo sapiens	2009-04-17
H	AMN88686	Human coronavirus HKU1	China	Homo sapiens	2009-04-23
H	AMN88694	Human coronavirus HKU1	China	Homo sapiens	2009-04-23
H	AGW27836	Human coronavirus HKU1	USA	Homo sapiens	2009-11-28
H	AGW27854	Human coronavirus HKU1	USA	Homo sapiens	2009-12-13
H	AGW27872	Human coronavirus HKU1	USA	Homo sapiens	2009-12-28
H	AJC98135	Betacoronavirus 1	China	Homo sapiens	2010-01-01
H	AGW27863	Human coronavirus HKU1	USA	Homo sapiens	2010-01-08
H	AGW27881	Human coronavirus HKU1	USA	Homo sapiens	2010-01-09
H	AGW27845	Human coronavirus HKU1	USA	Homo sapiens	2010-01-16
H	AGT17769	Human coronavirus HKU1	USA	Homo sapiens	2010-01-22
H	AIV41777	Betacoronavirus 1	China	Homo sapiens	2010-03-01
H	AIV41783	Betacoronavirus 1	China	Homo sapiens	2010-04-01
H	AIV41969	Betacoronavirus 1	China	Homo sapiens	2010-05-01
H	AWK59949	Human coronavirus NL63	Kenya	Homo sapiens	2010-05-11
H	AWK59931	Human coronavirus NL63	Kenya	Homo sapiens	2010-05-19
H	AWK59961	Human coronavirus NL63	Kenya	Homo sapiens	2010-05-20
H	AWK59967	Human coronavirus NL63	Kenya	Homo sapiens	2010-05-21
H	AWK59973	Human coronavirus NL63	Kenya	Homo sapiens	2010-05-24
H	AJC98127	Betacoronavirus 1	China	Homo sapiens	2010-06-01
H	AWK59955	Human coronavirus NL63	Kenya	Homo sapiens	2010-06-01
H	AWK59943	Human coronavirus NL63	Kenya	Homo sapiens	2010-06-04
H	AIV41789	Betacoronavirus 1	China	Homo sapiens	2010-07-01
H	AIV41819	Betacoronavirus 1	China	Homo sapiens	2010-07-01
H	AIV41831	Betacoronavirus 1	China	Homo sapiens	2010-07-01
H	AIV42005	Betacoronavirus 1	China	Homo sapiens	2010-07-01
H	AIV42011	Betacoronavirus 1	China	Homo sapiens	2010-09-01
H	AOL02453	Betacoronavirus 1	Mexico	Homo sapiens	2011-02-09
H	AMK59677	Betacoronavirus 1	United Kingdom	Homo sapiens	2011-08-20
H	AIX09799	Betacoronavirus 1	China	Homo sapiens	2011-10-03
H	AIX09807	Betacoronavirus 1	China	Homo sapiens	2011-10-04
H	AIV41837	Betacoronavirus 1	China	Homo sapiens	2012-02-01
H	AQN78656	Betacoronavirus 1	Malaysia	Homo sapiens	2012-02-22
H	AIV41849	Betacoronavirus 1	China	Homo sapiens	2012-03-01
H	AIV41897	Betacoronavirus 1	China	Homo sapiens	2012-03-01
H	AQN78664	Betacoronavirus 1	Malaysia	Homo sapiens	2012-03-28
H	AGH58717	Middle East respiratory syndrome-related coronavirus	Jordan	Homo sapiens	2012-04-01
H	AQN78672	Betacoronavirus 1	Malaysia	Homo sapiens	2012-04-02
H	AIV41873	Betacoronavirus 1	China	Homo sapiens	2012-05-01
H	AIV41879	Betacoronavirus 1	China	Homo sapiens	2012-05-01
H	AIV41885	Betacoronavirus 1	China	Homo sapiens	2012-05-01
H	AQN78680	Betacoronavirus 1	Malaysia	Homo sapiens	2012-05-02
H	AQN78688	Betacoronavirus 1	Malaysia	Homo sapiens	2012-05-09
H	AQN78696	Betacoronavirus 1	Malaysia	Homo sapiens	2012-05-18
H	AIV41843	Betacoronavirus 1	China	Homo sapiens	2012-06-01
H	AFS88936	Middle East respiratory syndrome-related coronavirus		Homo sapiens	2012-06-13
H	YP_009047204	Middle East respiratory syndrome-related coronavirus		Homo sapiens	2012-06-13
H	AGV08408	Middle East respiratory syndrome-related coronavirus	Saudi Arabia	Homo sapiens	2012-06-19
H	AQN78704	Betacoronavirus 1	Malaysia	Homo sapiens	2012-06-20
H	AQN78712	Betacoronavirus 1	Malaysia	Homo sapiens	2012-06-25
H	AQN78720	Betacoronavirus 1	Malaysia	Homo sapiens	2012-07-04
H	AQN78728	Betacoronavirus 1	Malaysia	Homo sapiens	2012-07-16
H	AQN78736	Betacoronavirus 1	Malaysia	Homo sapiens	2012-08-01
H	AQN78744	Betacoronavirus 1	Malaysia	Homo sapiens	2012-08-24
H	AQN78752	Betacoronavirus 1	Malaysia	Homo sapiens	2012-08-27
H	AQN78760	Betacoronavirus 1	Malaysia	Homo sapiens	2012-09-10
H	AFY13307	Middle East respiratory syndrome-related coronavirus	United Kingdom	Homo sapiens	2012-09-11
H	YP_007188579	Middle East respiratory syndrome-related coronavirus	United Kingdom	Homo sapiens	2012-09-11
H	AGG22542	Middle East respiratory syndrome-related coronavirus	United Kingdom	Homo sapiens	2012-09-19
H	AGV08379	Middle East respiratory syndrome-related coronavirus	Saudi Arabia	Homo sapiens	2012-10-23
H	AGV08584	Middle East respiratory syndrome-related coronavirus	Saudi Arabia	Homo sapiens	2012-10-30
H	AQN78768	Betacoronavirus 1	Malaysia	Homo sapiens	2013-01-02
H	AGV08390	Middle East respiratory syndrome-related coronavirus	Saudi Arabia	Homo sapiens	2013-02-05
H	AID50418	Middle East respiratory syndrome-related coronavirus	United Kingdom	Homo sapiens	2013-02-10
H	AJD81451	Middle East respiratory syndrome-related coronavirus	United Kingdom	Homo sapiens	2013-02-10
H	AJD81440	Middle East respiratory syndrome-related coronavirus	United Kingdom	Homo sapiens	2013-02-13
H	AQN78776	Betacoronavirus 1	Malaysia	Homo sapiens	2013-02-15
H	AHI48605	Middle East respiratory syndrome-related coronavirus	Saudi Arabia	Homo sapiens	2013-03-01
H	AGN70951	Middle East respiratory syndrome-related coronavirus	Saudi Arabia	Homo sapiens	2013-04-21
H	AGN70973	Middle East respiratory syndrome-related coronavirus	Saudi Arabia	Homo sapiens	2013-04-22
H	AIZ74417	Middle East respiratory syndrome-related coronavirus	France	Homo sapiens	2013-04-26
H	AGN70929	Middle East respiratory syndrome-related coronavirus	Saudi Arabia	Homo sapiens	2013-05-01
H	AHI48517	Middle East respiratory syndrome-related coronavirus	Saudi Arabia	Homo sapiens	2013-05-02
H	AGV08444	Middle East respiratory syndrome-related coronavirus	Saudi Arabia	Homo sapiens	2013-05-07
H	AHB33326	Middle East respiratory syndrome-related coronavirus	France	Homo sapiens	2013-05-07
H	AIZ74433	Middle East respiratory syndrome-related coronavirus	France	Homo sapiens	2013-05-07
H	AIZ74439	Middle East respiratory syndrome-related coronavirus	France	Homo sapiens	2013-05-07
H	AIZ74450	Middle East respiratory syndrome-related coronavirus	France	Homo sapiens	2013-05-07
H	AGN70962	Middle East respiratory syndrome-related coronavirus	Saudi Arabia	Homo sapiens	2013-05-09
H	AGV08546	Middle East respiratory syndrome-related coronavirus	Saudi Arabia	Homo sapiens	2013-05-11
H	AGV08535	Middle East respiratory syndrome-related coronavirus	Saudi Arabia	Homo sapiens	2013-05-12
H	AGV08467	Middle East respiratory syndrome-related coronavirus	Saudi Arabia	Homo sapiens	2013-05-13
H	AGV08558	Middle East respiratory syndrome-related coronavirus	Saudi Arabia	Homo sapiens	2013-05-15
H	AGV08480	Middle East respiratory syndrome-related coronavirus	Saudi Arabia	Homo sapiens	2013-05-23
H	AGV08573	Middle East respiratory syndrome-related coronavirus	Saudi Arabia	Homo sapiens	2013-05-23
H	AGV08492	Middle East respiratory syndrome-related coronavirus	Saudi Arabia	Homo sapiens	2013-05-30
H	AGV08455	Middle East respiratory syndrome-related coronavirus	Saudi Arabia	Homo sapiens	2013-06-04
H	AHI48594	Middle East respiratory syndrome-related coronavirus	Saudi Arabia	Homo sapiens	2013-06-12
H	AHI48550	Middle East respiratory syndrome-related coronavirus	Saudi Arabia	Homo sapiens	2013-06-12
H	AHI48583	Middle East respiratory syndrome-related coronavirus	Saudi Arabia	Homo sapiens	2013-07-02
H	ASU45696	Middle East respiratory syndrome-related coronavirus	United Arab Emirates	Homo sapiens	2013-07-10
H	ASU45708	Middle East respiratory syndrome-related coronavirus	United Arab Emirates	Homo sapiens	2013-07-12
H	AHI48528	Middle East respiratory syndrome-related coronavirus	Saudi Arabia	Homo sapiens	2013-07-17
H	AHI48561	Middle East respiratory syndrome-related coronavirus	Saudi Arabia	Homo sapiens	2013-08-05
H	AHI48572	Middle East respiratory syndrome-related coronavirus	Saudi Arabia	Homo sapiens	2013-08-15
H	AHI48539	Middle East respiratory syndrome-related coronavirus	Saudi Arabia	Homo sapiens	2013-08-28
H	AHC74088	Middle East respiratory syndrome-related coronavirus	Qatar	Homo sapiens	2013-10-13
H	AHC74098	Middle East respiratory syndrome-related coronavirus	Qatar	Homo sapiens	2013-10-17
H	AKM76229	Middle East respiratory syndrome-related coronavirus	Oman	Homo sapiens	2013-10-28
H	AHE78108	Middle East respiratory syndrome-related coronavirus	Saudi Arabia	Homo sapiens	2013-11-05
H	AHN10812	Middle East respiratory syndrome-related coronavirus	Saudi Arabia	Homo sapiens	2013-11-06
H	AIY60578	Middle East respiratory syndrome-related coronavirus	United Arab Emirates	Homo sapiens	2013-11-15
H	ASU45730	Middle East respiratory syndrome-related coronavirus	United Arab Emirates	Homo sapiens	2013-12-23
H	AKM76239	Middle East respiratory syndrome-related coronavirus	Oman	Homo sapiens	2013-12-28
H	ALX27232	Middle East respiratory syndrome-related coronavirus	Jordan	Homo sapiens	2014-01-22
H	AIY60558	Middle East respiratory syndrome-related coronavirus	United Arab Emirates	Homo sapiens	2014-03-07
H	AIY60518	Middle East respiratory syndrome-related coronavirus	United Arab Emirates	Homo sapiens	2014-04-07
H	AID55068	Middle East respiratory syndrome-related coronavirus	Saudi Arabia	Homo sapiens	2014-04-07
H	AIY60528	Middle East respiratory syndrome-related coronavirus	United Arab Emirates	Homo sapiens	2014-04-10
H	AIY60538	Middle East respiratory syndrome-related coronavirus	United Arab Emirates	Homo sapiens	2014-04-10
H	ASU45741	Middle East respiratory syndrome-related coronavirus	United Arab Emirates	Homo sapiens	2014-04-10
H	ASU45752	Middle East respiratory syndrome-related coronavirus	United Arab Emirates	Homo sapiens	2014-04-10
H	ASU45719	Middle East respiratory syndrome-related coronavirus	United Arab Emirates	Homo sapiens	2014-04-10
H	AID55069	Middle East respiratory syndrome-related coronavirus	Saudi Arabia	Homo sapiens	2014-04-12
H	ASU45763	Middle East respiratory syndrome-related coronavirus	United Arab Emirates	Homo sapiens	2014-04-12
H	AIY60588	Middle East respiratory syndrome-related coronavirus	United Arab Emirates	Homo sapiens	2014-04-13
H	AID55070	Middle East respiratory syndrome-related coronavirus	Saudi Arabia	Homo sapiens	2014-04-14
H	ASU45774	Middle East respiratory syndrome-related coronavirus	United Arab Emirates	Homo sapiens	2014-04-14
H	AID55072	Middle East respiratory syndrome-related coronavirus	Saudi Arabia	Homo sapiens	2014-04-15
H	ASU45785	Middle East respiratory syndrome-related coronavirus	United Arab Emirates	Homo sapiens	2014-04-15
H	AIY60568	Middle East respiratory syndrome-related coronavirus	United Arab Emirates	Homo sapiens	2014-04-17
H	AIY60548	Middle East respiratory syndrome-related coronavirus	United Arab Emirates	Homo sapiens	2014-04-19
H	ASU45796	Middle East respiratory syndrome-related coronavirus	United Arab Emirates	Homo sapiens	2014-04-20
H	ALX27243	Middle East respiratory syndrome-related coronavirus	Jordan	Homo sapiens	2014-04-21
H	AID55071	Middle East respiratory syndrome-related coronavirus	Saudi Arabia	Homo sapiens	2014-04-21
H	AYV64549	Middle East respiratory syndrome-related coronavirus	Jordan	Homo sapiens	2014-04-21
H	AID55073	Middle East respiratory syndrome-related coronavirus	Saudi Arabia	Homo sapiens	2014-04-22
H	AKN24821	Middle East respiratory syndrome-related coronavirus	Saudi Arabia	Homo sapiens	2014-04-28
H	AHZ58501	Middle East respiratory syndrome-related coronavirus	USA	Homo sapiens	2014-04-30
H	AKN24812	Middle East respiratory syndrome-related coronavirus	Saudi Arabia	Homo sapiens	2014-04-30
H	AKN24803	Middle East respiratory syndrome-related coronavirus	Saudi Arabia	Homo sapiens	2014-05-01
H	AKN24830	Middle East respiratory syndrome-related coronavirus	Saudi Arabia	Homo sapiens	2014-05-03
H	AKN24767	Middle East respiratory syndrome-related coronavirus	Saudi Arabia	Homo sapiens	2014-05-07
H	AKN24758	Middle East respiratory syndrome-related coronavirus	Saudi Arabia	Homo sapiens	2014-05-09
H	AHZ64057	Middle East respiratory syndrome-related coronavirus	USA	Homo sapiens	2014-05-10
H	AKN24794	Middle East respiratory syndrome-related coronavirus	Saudi Arabia	Homo sapiens	2014-05-11
H	AKN24749	Middle East respiratory syndrome-related coronavirus	Saudi Arabia	Homo sapiens	2014-05-12
H	AKN24776	Middle East respiratory syndrome-related coronavirus	Saudi Arabia	Homo sapiens	2014-05-12
H	AKN24785	Middle East respiratory syndrome-related coronavirus	Saudi Arabia	Homo sapiens	2014-05-18
H	AYV64560	Middle East respiratory syndrome-related coronavirus	Jordan	Homo sapiens	2014-05-23
H	AYP10298	Middle East respiratory syndrome-related coronavirus	Jordan	Homo sapiens	2014-05-23
H	AIZ48760	Middle East respiratory syndrome-related coronavirus	USA	Homo sapiens	2014-06-01
H	AMQ48993	Middle East respiratory syndrome-related coronavirus	Saudi Arabia	Homo sapiens	2014-11-04
H	AVA26873	Human coronavirus NL63	South Korea	Homo sapiens	2014-11-25
H	AKI29284	Middle East respiratory syndrome-related coronavirus	Saudi Arabia	Homo sapiens	2015-01-06
H	AQZ41285	Middle East respiratory syndrome-related coronavirus	Oman	Homo sapiens	2015-01-06
H	APF29061	Human coronavirus NL63	Haiti	Homo sapiens	2015-01-21
H	AKI29255	Middle East respiratory syndrome-related coronavirus	Saudi Arabia	Homo sapiens	2015-01-21
H	AKI29265	Middle East respiratory syndrome-related coronavirus	Saudi Arabia	Homo sapiens	2015-01-21
H	APF29062	Human coronavirus NL63	Haiti	Homo sapiens	2015-01-22
H	AKI29275	Middle East respiratory syndrome-related coronavirus	Saudi Arabia	Homo sapiens	2015-01-26
H	APF29063	Human coronavirus NL63	Haiti	Homo sapiens	2015-01-27
H	ALW82720	Middle East respiratory syndrome-related coronavirus	Saudi Arabia	Homo sapiens	2015-02-02
H	ALW82731	Middle East respiratory syndrome-related coronavirus	Saudi Arabia	Homo sapiens	2015-02-02
H	ALW82709	Middle East respiratory syndrome-related coronavirus	Saudi Arabia	Homo sapiens	2015-02-05
H	AQZ41311	Middle East respiratory syndrome-related coronavirus	Saudi Arabia	Homo sapiens	2015-02-07
H	ALW82680	Middle East respiratory syndrome-related coronavirus	Saudi Arabia	Homo sapiens	2015-02-07
H	ALW82636	Middle East respiratory syndrome-related coronavirus	Saudi Arabia	Homo sapiens	2015-02-09
H	AKK52582	Middle East respiratory syndrome-related coronavirus	Saudi Arabia	Homo sapiens	2015-02-10
H	AKK52602	Middle East respiratory syndrome-related coronavirus	Saudi Arabia	Homo sapiens	2015-02-10
H	ALW82753	Middle East respiratory syndrome-related coronavirus	Saudi Arabia	Homo sapiens	2015-02-10
H	ALW82742	Middle East respiratory syndrome-related coronavirus	Saudi Arabia	Homo sapiens	2015-02-13
H	ALW82691	Middle East respiratory syndrome-related coronavirus	Saudi Arabia	Homo sapiens	2015-02-15
H	ALW82647	Middle East respiratory syndrome-related coronavirus	Saudi Arabia	Homo sapiens	2015-02-22
H	AKK52592	Middle East respiratory syndrome-related coronavirus	Saudi Arabia	Homo sapiens	2015-03-01
H	AKK52612	Middle East respiratory syndrome-related coronavirus	Saudi Arabia	Homo sapiens	2015-03-01
H	ALW82669	Middle East respiratory syndrome-related coronavirus	Saudi Arabia	Homo sapiens	2015-03-27
H	AQZ41322	Middle East respiratory syndrome-related coronavirus	Saudi Arabia	Homo sapiens	2015-05-01
H	AQZ41332	Middle East respiratory syndrome-related coronavirus	Saudi Arabia	Homo sapiens	2015-05-10
H	ALW82658	Middle East respiratory syndrome-related coronavirus	Saudi Arabia	Homo sapiens	2015-05-10
H	AQZ41365	Middle East respiratory syndrome-related coronavirus	Saudi Arabia	Homo sapiens	2015-05-13
H	AKL59401	Middle East respiratory syndrome-related coronavirus	South Korea	Homo sapiens	2015-05-20
H	AQZ41376	Middle East respiratory syndrome-related coronavirus	Saudi Arabia	Homo sapiens	2015-05-20
H	QCQ29075	Middle East respiratory syndrome-related coronavirus	South Korea	Homo sapiens	2015-05-20
H	AZU90731	Middle East respiratory syndrome-related coronavirus	Qatar	Homo sapiens	2015-05-21
H	AKS48062	Middle East respiratory syndrome-related coronavirus	South Korea	Homo sapiens	2015-05-22
H	AQZ41343	Middle East respiratory syndrome-related coronavirus	Saudi Arabia	Homo sapiens	2015-05-22
H	AKJ80137	Middle East respiratory syndrome-related coronavirus	China	Homo sapiens	2015-05-27
H	AQZ41354	Middle East respiratory syndrome-related coronavirus	Saudi Arabia	Homo sapiens	2015-05-27
H	ALB08267	Middle East respiratory syndrome-related coronavirus	South Korea	Homo sapiens	2015-05-31
H	ATY74381	Middle East respiratory syndrome-related coronavirus	Saudi Arabia	Homo sapiens	2015-06-02
H	ALB08289	Middle East respiratory syndrome-related coronavirus	South Korea	Homo sapiens	2015-06-03
H	ANC28656	Middle East respiratory syndrome-related coronavirus	South Korea	Homo sapiens	2015-06-04
H	ATY74403	Middle East respiratory syndrome-related coronavirus	Saudi Arabia	Homo sapiens	2015-06-07
H	ATY74392	Middle East respiratory syndrome-related coronavirus	Saudi Arabia	Homo sapiens	2015-06-07
H	AML60270	Middle East respiratory syndrome-related coronavirus	South Korea	Homo sapiens	2015-06-08
H	ANC28645	Middle East respiratory syndrome-related coronavirus	South Korea	Homo sapiens	2015-06-11
H	ALB08278	Middle East respiratory syndrome-related coronavirus	South Korea	Homo sapiens	2015-06-13
H	ATY74414	Middle East respiratory syndrome-related coronavirus	Saudi Arabia	Homo sapiens	2015-06-15
H	ANC28667	Middle East respiratory syndrome-related coronavirus	South Korea	Homo sapiens	2015-06-17
H	ANC28678	Middle East respiratory syndrome-related coronavirus	South Korea	Homo sapiens	2015-06-17
H	ALD51904	Middle East respiratory syndrome-related coronavirus	Thailand	Homo sapiens	2015-06-17
H	ALB08300	Middle East respiratory syndrome-related coronavirus	South Korea	Homo sapiens	2015-06-18
H	ALB08257	Middle East respiratory syndrome-related coronavirus	South Korea	Homo sapiens	2015-06-19
H	ALB08311	Middle East respiratory syndrome-related coronavirus	South Korea	Homo sapiens	2015-06-21
H	ANC28689	Middle East respiratory syndrome-related coronavirus	South Korea	Homo sapiens	2015-06-22
H	ALB08322	Middle East respiratory syndrome-related coronavirus	South Korea	Homo sapiens	2015-06-24
H	ANC28700	Middle East respiratory syndrome-related coronavirus	South Korea	Homo sapiens	2015-06-26
H	ALB08246	Middle East respiratory syndrome-related coronavirus	South Korea	Homo sapiens	2015-06-29
H	ANC28711	Middle East respiratory syndrome-related coronavirus	South Korea	Homo sapiens	2015-07-03
H	AMQ49015	Middle East respiratory syndrome-related coronavirus	Saudi Arabia	Homo sapiens	2015-07-12
H	AXN73393	Middle East respiratory syndrome-related coronavirus	Saudi Arabia	Homo sapiens	2015-08-22
H	AMQ49026	Middle East respiratory syndrome-related coronavirus	Saudi Arabia	Homo sapiens	2015-08-24
H	AMQ49037	Middle East respiratory syndrome-related coronavirus	Saudi Arabia	Homo sapiens	2015-08-24
H	AMQ49048	Middle East respiratory syndrome-related coronavirus	Saudi Arabia	Homo sapiens	2015-08-24
H	AMQ49070	Middle East respiratory syndrome-related coronavirus	Saudi Arabia	Homo sapiens	2015-08-24
H	AXN73426	Middle East respiratory syndrome-related coronavirus	Saudi Arabia	Homo sapiens	2015-08-24
H	AXN73437	Middle East respiratory syndrome-related coronavirus	Saudi Arabia	Homo sapiens	2015-08-24
H	AXN73415	Middle East respiratory syndrome-related coronavirus	Saudi Arabia	Homo sapiens	2015-08-24
H	AXN73404	Middle East respiratory syndrome-related coronavirus	Saudi Arabia	Homo sapiens	2015-08-24
H	ARQ84735	Middle East respiratory syndrome-related coronavirus	Jordan	Homo sapiens	2015-08-25
H	AXN73459	Middle East respiratory syndrome-related coronavirus	Saudi Arabia	Homo sapiens	2015-08-26
H	AYO86699	Middle East respiratory syndrome-related coronavirus	Saudi Arabia	Homo sapiens	2015-08-26
H	AXN73448	Middle East respiratory syndrome-related coronavirus	Saudi Arabia	Homo sapiens	2015-08-26
H	AMQ49059	Middle East respiratory syndrome-related coronavirus	Saudi Arabia	Homo sapiens	2015-08-27
H	ARQ84768	Middle East respiratory syndrome-related coronavirus	Jordan	Homo sapiens	2015-08-30
H	ANU06084	Human coronavirus NL63	USA	Homo sapiens	2015-09-01
H	APF29071	Human coronavirus NL63	USA	Homo sapiens	2015-09-01
H	AXN73481	Middle East respiratory syndrome-related coronavirus	Saudi Arabia	Homo sapiens	2015-09-01
H	AXN73470	Middle East respiratory syndrome-related coronavirus	Saudi Arabia	Homo sapiens	2015-09-01
H	AXN73492	Middle East respiratory syndrome-related coronavirus	Saudi Arabia	Homo sapiens	2015-09-01
H	ARQ84757	Middle East respiratory syndrome-related coronavirus	Jordan	Homo sapiens	2015-09-07
H	AXN73503	Middle East respiratory syndrome-related coronavirus	Saudi Arabia	Homo sapiens	2015-09-18
H	ARQ84746	Middle East respiratory syndrome-related coronavirus	Jordan	Homo sapiens	2015-09-19
H	AXN73370	Middle East respiratory syndrome-related coronavirus	Saudi Arabia	Homo sapiens	2015-10-13
H	AYJ71470	Middle East respiratory syndrome-related coronavirus	Saudi Arabia	Homo sapiens	2015-10-13
H	AVV61900	Middle East respiratory syndrome-related coronavirus	Saudi Arabia	Homo sapiens	2015-10-15
H	AXN73381	Middle East respiratory syndrome-related coronavirus	Saudi Arabia	Homo sapiens	2015-10-15
H	AYJ71481	Middle East respiratory syndrome-related coronavirus	Saudi Arabia	Homo sapiens	2015-10-15
H	ANF29217	Middle East respiratory syndrome-related coronavirus	Saudi Arabia	Homo sapiens	2016-01-01
H	ANF29228	Middle East respiratory syndrome-related coronavirus	Saudi Arabia	Homo sapiens	2016-01-01
H	AXN73514	Middle East respiratory syndrome-related coronavirus	Saudi Arabia	Homo sapiens	2016-01-31
H	ANF29173	Middle East respiratory syndrome-related coronavirus	Saudi Arabia	Homo sapiens	2016-02-01
H	ANF29184	Middle East respiratory syndrome-related coronavirus	Saudi Arabia	Homo sapiens	2016-02-01
H	ANF29195	Middle East respiratory syndrome-related coronavirus	Saudi Arabia	Homo sapiens	2016-02-01
H	ANF29206	Middle East respiratory syndrome-related coronavirus	Saudi Arabia	Homo sapiens	2016-02-01
H	ANF29162	Middle East respiratory syndrome-related coronavirus	Saudi Arabia	Homo sapiens	2016-02-01
H	AVR40342	Betacoronavirus 1	USA	Homo sapiens	2016-02-01
H	ANF29239	Middle East respiratory syndrome-related coronavirus	Saudi Arabia	Homo sapiens	2016-02-25
H	ANF29250	Middle East respiratory syndrome-related coronavirus	Saudi Arabia	Homo sapiens	2016-02-27
H	ANF29261	Middle East respiratory syndrome-related coronavirus	Saudi Arabia	Homo sapiens	2016-02-29
H	ANF29272	Middle East respiratory syndrome-related coronavirus	Saudi Arabia	Homo sapiens	2016-02-29
H	AST12964	Human coronavirus 229E	Haiti	Homo sapiens	2016-03-01
H	ATG84679	Middle East respiratory syndrome-related coronavirus	Saudi Arabia	Homo sapiens	2016-03-05
H	ATG84690	Middle East respiratory syndrome-related coronavirus	Saudi Arabia	Homo sapiens	2016-03-06
H	ATG84701	Middle East respiratory syndrome-related coronavirus	Saudi Arabia	Homo sapiens	2016-03-07
H	AVQ05264	Betacoronavirus 1	USA	Homo sapiens	2016-03-07
H	ATG84712	Middle East respiratory syndrome-related coronavirus	Saudi Arabia	Homo sapiens	2016-03-12
H	ATG84756	Middle East respiratory syndrome-related coronavirus	Saudi Arabia	Homo sapiens	2016-03-13
H	ATG84723	Middle East respiratory syndrome-related coronavirus	Saudi Arabia	Homo sapiens	2016-03-13
H	ATG84745	Middle East respiratory syndrome-related coronavirus	Saudi Arabia	Homo sapiens	2016-03-14
H	ATG84734	Middle East respiratory syndrome-related coronavirus	Saudi Arabia	Homo sapiens	2016-03-18
H	ATG84888	Middle East respiratory syndrome-related coronavirus	Saudi Arabia	Homo sapiens	2016-03-29
H	ATG84789	Middle East respiratory syndrome-related coronavirus	Saudi Arabia	Homo sapiens	2016-04-04
H	ATG84800	Middle East respiratory syndrome-related coronavirus	Saudi Arabia	Homo sapiens	2016-04-10
H	ATG84778	Middle East respiratory syndrome-related coronavirus	Saudi Arabia	Homo sapiens	2016-04-13
H	AXN73525	Middle East respiratory syndrome-related coronavirus	Saudi Arabia	Homo sapiens	2016-04-14
H	ATG84767	Middle East respiratory syndrome-related coronavirus	Saudi Arabia	Homo sapiens	2016-04-18
H	ATG84822	Middle East respiratory syndrome-related coronavirus	Saudi Arabia	Homo sapiens	2016-06-01
H	ATG84833	Middle East respiratory syndrome-related coronavirus	Saudi Arabia	Homo sapiens	2016-06-16
H	ATG84844	Middle East respiratory syndrome-related coronavirus	Saudi Arabia	Homo sapiens	2016-07-01
H	ATG84855	Middle East respiratory syndrome-related coronavirus	Saudi Arabia	Homo sapiens	2016-07-12
H	ATG84811	Middle East respiratory syndrome-related coronavirus	Saudi Arabia	Homo sapiens	2016-07-20
H	AWM99582	Middle East respiratory syndrome-related coronavirus	Saudi Arabia	Homo sapiens	2016-08-01
H	ATG84877	Middle East respiratory syndrome-related coronavirus	Saudi Arabia	Homo sapiens	2016-09-21
H	ATG84866	Middle East respiratory syndrome-related coronavirus	Saudi Arabia	Homo sapiens	2016-09-21
H	AXG21654	Middle East respiratory syndrome-related coronavirus	Saudi Arabia	Homo sapiens	2016-12-04
H	AWU59321	Middle East respiratory syndrome-related coronavirus	Saudi Arabia	Homo sapiens	2016-12-06
H	AWW13566	Betacoronavirus 1	Cote d'Ivoire	Homo sapiens	2016-12-10
H	AWW13575	Betacoronavirus 1	Cote d'Ivoire	Homo sapiens	2016-12-10
H	AZP73840	Betacoronavirus 1	USA	Homo sapiens	2016-12-19
H	ATG84921	Middle East respiratory syndrome-related coronavirus	Saudi Arabia	Homo sapiens	2016-12-25
H	ATN39872	Betacoronavirus 1	USA	Homo sapiens	2017-01-03
H	ATG84910	Middle East respiratory syndrome-related coronavirus	Saudi Arabia	Homo sapiens	2017-01-10
H	AVR40344	Betacoronavirus 1	USA	Homo sapiens	2017-01-17
H	ATG84899	Middle East respiratory syndrome-related coronavirus	Saudi Arabia	Homo sapiens	2017-01-23
H	AXG21665	Middle East respiratory syndrome-related coronavirus	Saudi Arabia	Homo sapiens	2017-02-28
H	AXN92228	Middle East respiratory syndrome-related coronavirus	Saudi Arabia	Homo sapiens	2017-05-05
H	AXN92260	Middle East respiratory syndrome-related coronavirus	Saudi Arabia	Homo sapiens	2017-05-15
H	AYV99747	Severe acute respiratory syndrome-related coronavirus	USA	Homo sapiens	2017-05-27
H	AYV99761	Severe acute respiratory syndrome-related coronavirus	USA	Homo sapiens	2017-05-28
H	AYV99775	Severe acute respiratory syndrome-related coronavirus	USA	Homo sapiens	2017-05-29
H	AYV99789	Severe acute respiratory syndrome-related coronavirus	USA	Homo sapiens	2017-05-30
H	AYV99803	Severe acute respiratory syndrome-related coronavirus	USA	Homo sapiens	2017-05-31
H	AVK87318	Middle East respiratory syndrome-related coronavirus	Saudi Arabia	Homo sapiens	2017-05-31
H	AYV99817	Severe acute respiratory syndrome-related coronavirus	USA	Homo sapiens	2017-06-01
H	AVK87329	Middle East respiratory syndrome-related coronavirus	Saudi Arabia	Homo sapiens	2017-06-02
H	AVK87340	Middle East respiratory syndrome-related coronavirus	Saudi Arabia	Homo sapiens	2017-06-02
H	AXN73359	Middle East respiratory syndrome-related coronavirus	Saudi Arabia	Homo sapiens	2017-06-02
H	AXN92238	Middle East respiratory syndrome-related coronavirus	Saudi Arabia	Homo sapiens	2017-06-03
H	AVK87351	Middle East respiratory syndrome-related coronavirus	Saudi Arabia	Homo sapiens	2017-06-03
H	AYN64561	Human coronavirus HKU1	Thailand	Homo sapiens	2017-06-04
H	AXN92249	Middle East respiratory syndrome-related coronavirus	Saudi Arabia	Homo sapiens	2017-06-06
H	AVK87362	Middle East respiratory syndrome-related coronavirus	Saudi Arabia	Homo sapiens	2017-06-07
H	AVK87373	Middle East respiratory syndrome-related coronavirus	Saudi Arabia	Homo sapiens	2017-06-08
H	AVK87384	Middle East respiratory syndrome-related coronavirus	Saudi Arabia	Homo sapiens	2017-06-10
H	AVK87450	Middle East respiratory syndrome-related coronavirus	Saudi Arabia	Homo sapiens	2017-06-11
H	AVK87406	Middle East respiratory syndrome-related coronavirus	Saudi Arabia	Homo sapiens	2017-06-12
H	AVK87395	Middle East respiratory syndrome-related coronavirus	Saudi Arabia	Homo sapiens	2017-06-12
H	AVK87461	Middle East respiratory syndrome-related coronavirus	Saudi Arabia	Homo sapiens	2017-06-14
H	AVK87439	Middle East respiratory syndrome-related coronavirus	Saudi Arabia	Homo sapiens	2017-06-14
H	AVK87417	Middle East respiratory syndrome-related coronavirus	Saudi Arabia	Homo sapiens	2017-06-15
H	AVK87428	Middle East respiratory syndrome-related coronavirus	Saudi Arabia	Homo sapiens	2017-06-17
H	QBF80455	Middle East respiratory syndrome-related coronavirus	Saudi Arabia	Homo sapiens	2017-08-01
H	QBF80466	Middle East respiratory syndrome-related coronavirus	Saudi Arabia	Homo sapiens	2017-08-07
H	QBF80477	Middle East respiratory syndrome-related coronavirus	Saudi Arabia	Homo sapiens	2017-08-15
H	QBF80488	Middle East respiratory syndrome-related coronavirus	Saudi Arabia	Homo sapiens	2017-08-17
H	QDH43719	Betacoronavirus 1	Kenya	Homo sapiens	2018-01-18
H	QBF80499	Middle East respiratory syndrome-related coronavirus	Saudi Arabia	Homo sapiens	2018-06-08
H	QBF80510	Middle East respiratory syndrome-related coronavirus	Saudi Arabia	Homo sapiens	2018-06-13
H	QBF80521	Middle East respiratory syndrome-related coronavirus	Saudi Arabia	Homo sapiens	2018-07-09
H	QBF80532	Middle East respiratory syndrome-related coronavirus	Saudi Arabia	Homo sapiens	2018-07-12
H	QED88019	Human coronavirus NL63	China	Homo sapiens	2018-07-13
H	QBF80543	Middle East respiratory syndrome-related coronavirus	Saudi Arabia	Homo sapiens	2018-07-18
H	QED88040	Human coronavirus NL63	China	Homo sapiens	2018-07-25
H	QBF80554	Middle East respiratory syndrome-related coronavirus	Saudi Arabia	Homo sapiens	2018-08-03
H	QED88026	Human coronavirus NL63	China	Homo sapiens	2018-08-14
H	QED88012	Human coronavirus NL63	China	Homo sapiens	2018-08-15
H	QBF80611	Middle East respiratory syndrome-related coronavirus	Saudi Arabia	Homo sapiens	2018-08-16
H	AYM48030	Middle East respiratory syndrome-related coronavirus	United Kingdom	Homo sapiens	2018-08-22
H	QBF80565	Middle East respiratory syndrome-related coronavirus	Saudi Arabia	Homo sapiens	2018-08-30
H	QBF80576	Middle East respiratory syndrome-related coronavirus	Saudi Arabia	Homo sapiens	2018-08-31
H	QED88033	Human coronavirus NL63	China	Homo sapiens	2018-09-01
H	QBF80598	Middle East respiratory syndrome-related coronavirus	Saudi Arabia	Homo sapiens	2018-09-15
H	QBF80587	Middle East respiratory syndrome-related coronavirus	Saudi Arabia	Homo sapiens	2018-09-15
H	AZK15900	Middle East respiratory syndrome-related coronavirus	South Korea	Homo sapiens	2018-10-20
H	QEJ82215	Middle East respiratory syndrome-related coronavirus	Saudi Arabia	Homo sapiens	2019-01-28
H	QEJ82226	Middle East respiratory syndrome-related coronavirus	Saudi Arabia	Homo sapiens	2019-02-15
H	QDP16195	Middle East respiratory syndrome-related coronavirus	Saudi Arabia	Homo sapiens	2019-03-27
H	QDP16206	Middle East respiratory syndrome-related coronavirus	Saudi Arabia	Homo sapiens	2019-03-28
H	YP_009724390	Wuhan seafood market pneumonia virus	China	Homo sapiens	2019-12-01
H	QHD43416	Wuhan seafood market pneumonia virus	China	Homo sapiens	2019-12-01
H	QHO62112	Wuhan seafood market pneumonia virus	China	Homo sapiens	2020-01-02
H	QHO62107	Wuhan seafood market pneumonia virus	China	Homo sapiens	2020-01-02
H	QHO62877	Wuhan seafood market pneumonia virus	USA	Homo sapiens	2020-01-21
H	QHQ71973	Wuhan seafood market pneumonia virus	USA	Homo sapiens	2020-01-22
H	QHQ82464	Wuhan seafood market pneumonia virus	USA	Homo sapiens	2020-01-22
H	QHQ71963	Wuhan seafood market pneumonia virus	USA	Homo sapiens	2020-01-23
H	YP_173238	Human coronavirus HKU1		Homo sapiens
H	AAT98580	Human coronavirus HKU1		Homo sapiens
H	AAP41037	Severe acute respiratory syndrome-related coronavirus	Canada	Homo sapiens
N	ADP06504	Avian coronavirus	USA	Gallus gallus	1941
N	ADP06515	Avian coronavirus	USA	Gallus gallus	1941
N	ABG89335	Alphacoronavirus 1	USA	Sus scrofa	1952
N	ADV71797	Avian coronavirus	USA	Gallus gallus	1954
N	ADV71810	Avian coronavirus	USA	Gallus gallus	1956
N	ADV71772	Avian coronavirus	USA	Gallus gallus	1960
N	ADV71785	Avian coronavirus	Netherlands	Gallus gallus	1960
N	ACQ55230	Avian coronavirus	Netherlands	Gallus gallus	1960
N	ADV71822	Avian coronavirus	USA	Gallus gallus	1964
N	ADA83537	Avian coronavirus	USA	Gallus gallus	1965
N	ADA83497	Avian coronavirus	USA	Gallus gallus	1966
N	ADV71760	Avian coronavirus	USA	Gallus gallus	1971
N	AFX81091	Alphacoronavirus 1	Germany	Canis lupus familiaris	1971
N	ADA83507	Avian coronavirus	USA	Gallus gallus	1972
N	ADA83547	Avian coronavirus	USA	Gallus gallus	1972
N	ACN71196	Alphacoronavirus 1	China	Sus scrofa	1973
N	AEQ61968	Alphacoronavirus 1	USA	Canis lupus familiaris	1976
N	AFX81098	Alphacoronavirus 1	USA	Canis lupus familiaris	1978
N	AFX81108	Alphacoronavirus 1	USA	Canis lupus familiaris	1978
N	ADA83557	Avian coronavirus	USA	Gallus gallus	1979
N	AXB38894	Avian coronavirus	Netherlands		1979
N	ADP06459	Avian coronavirus	USA	Gallus gallus	1981
N	ADP06471	Avian coronavirus	USA	Gallus gallus	1981
N	ABG89288	Betacoronavirus 1		Bos taurus	1983
N	ADA83517	Avian coronavirus	USA	Gallus gallus	1983
N	ALH21111	Avian coronavirus	Belgium	Gallus gallus	1984
N	ADA83567	Avian coronavirus	USA	Gallus gallus	1985
N	AGK85499	Avian coronavirus	China	Gallus gallus	1985
N	AEQ55004	Porcine epidemic diarrhea virus	China	Sus scrofa	1986
N	ABG89306	Alphacoronavirus 1	USA	Sus scrofa	1987
N	ASV64286	Alphacoronavirus 1	USA		1988
N	AFQ31010	Avian coronavirus	South Korea	Gallus gallus	1991
N	ADV71734	Avian coronavirus	USA	Gallus gallus	1991
N	ADA83527	Avian coronavirus	USA	Gallus gallus	1991
N	ADV71747	Avian coronavirus	USA	Gallus gallus	1992
N	ACV87265	Avian coronavirus	USA	Meleagris gallopavo	1994
N	QHB80054	Avian coronavirus	USA	Gallus gallus	1994
N	ADA83477	Avian coronavirus	USA	Gallus gallus	1995
N	AXR85432	Avian coronavirus	Italy	Gallus gallus	1996
N	ACH72794	Avian coronavirus	China	Gallus gallus	1997
N	AFQ94231	Avian coronavirus	China	Gallus gallus	1997
N	APY26728	Avian coronavirus	China	Gallus gallus	1998
N	ADP06481	Avian coronavirus	USA	Gallus gallus	1998
N	ADP06492	Avian coronavirus	USA	Gallus gallus	1998
N	ACV87276	Avian coronavirus	USA	Meleagris gallopavo	1998
N	ALS35469	Porcine epidemic diarrhea virus	China		1998
N	AQY55830	Avian coronavirus	China	Gallus gallus	1999
N	ACV87254	Avian coronavirus	USA	Meleagris gallopavo	2001
N	AFQ94240	Avian coronavirus	China	Gallus gallus	2001
N	ARS22410	Avian coronavirus	South Korea	Gallus gallus	2003
N	APY23479	Avian coronavirus	China	Gallus gallus	2003
N	ACV87236	Avian coronavirus	USA	Meleagris gallopavo	2003
N	ADA83490	Avian coronavirus	USA	Gallus gallus	2003
N	AKZ66476	Alphacoronavirus 1	Italy		2003
N	AKV63205	Avian coronavirus	India	Gallus gallus	2003
N	APY26745	Avian coronavirus	China	Gallus gallus	2003
N	ADI54955	Avian coronavirus	China	Gallus gallus	2004
N	APZ73706	Avian coronavirus	China	Gallus gallus	2004
N	ARS22420	Avian coronavirus	South Korea	Gallus gallus	2005
N	ARB66180	Avian coronavirus	China	Gallus gallus	2005
N	APY23533	Avian coronavirus	China	Gallus gallus	2005
N	AEJ80238	Avian coronavirus	China	Gallus gallus	2005
N	AKA65829	Alphacoronavirus 1	Italy	Canis lupus familiaris	2005
N	APU51838	Avian coronavirus	China	Gallus gallus	2005
N	ARS22460	Avian coronavirus	South Korea	Gallus gallus	2006
N	APY23542	Avian coronavirus	China	Gallus gallus	2006
N	ACU31032	Severe acute respiratory syndrome-related coronavirus	China	Rhinolophus sinicus	2006
N	ADA83467	Avian coronavirus	USA	Gallus gallus	2006
N	AFE48795	Rabbit coronavirus HKU14	China	Oryctolagus cuniculus	2006
N	YP_005454245	Rabbit coronavirus HKU14	China	Oryctolagus cuniculus	2006
N	QAT77248	Avian coronavirus	China	Gallus gallus	2006
N	ARB66117	Avian coronavirus	China	Gallus gallus	2007
N	ARB66135	Avian coronavirus	China	Gallus gallus	2007
N	AQY55803	Avian coronavirus	China	Gallus gallus	2007
N	APY23524	Avian coronavirus	China	Gallus gallus	2007
N	APY23569	Avian coronavirus	China	Gallus gallus	2007
N	ADI54945	Avian coronavirus	China	Gallus gallus	2007
N	AFE48805	Rabbit coronavirus HKU14	China	Oryctolagus cuniculus	2007
N	AFE48817	Rabbit coronavirus HKU14	China	Oryctolagus cuniculus	2007
N	AFE48827	Rabbit coronavirus HKU14	China	Oryctolagus cuniculus	2007
N	AFD29201	White-eye coronavirus HKU16	China	Zosteropidae	2007
N	AFD29209	Sparrow coronavirus HKU17	China	Passeridae	2007
N	AFD29217	Magpie-robin coronavirus HKU18	China	Muscicapidae	2007
N	AFD29226	Night heron coronavirus HKU19	China	Ardeidae	2007
N	AFD29244	Common moorhen coronavirus HKU21	China	Gallinula chloropus	2007
N	YP_005352863	Night heron coronavirus HKU19	China	Ardeidae	2007
N	YP_005352846	Sparrow coronavirus HKU17	China	Passeridae	2007
N	YP_005352854	Magpie-robin coronavirus HKU18	China	Muscicapidae	2007
N	YP_005352838	White-eye coronavirus HKU16	China	Zosteropidae	2007
N	YP_005352881	Common moorhen coronavirus HKU21	China	Gallinula chloropus	2007
N	ARS22400	Avian coronavirus	South Korea	Gallus gallus	2008
N	ARB66162	Avian coronavirus	China	Gallus gallus	2008
N	APY23623	Avian coronavirus	China	Gallus gallus	2008
N	APZ73843	Avian coronavirus	China	Gallus gallus	2008
N	ADK66841	Bat coronavirus BM48-31/BGR/2008	Bulgaria	Rhinolophus blasii	2008
N	AFW97360	Betacoronavirus 1	South Korea	Canis lupus familiaris	2008
N	AFQ31000	Avian coronavirus	South Korea	Gallus gallus	2008
N	AFI49431	Human coronavirus 229E	USA	Vicugna pacos	2008
N	AEK31974	Avian coronavirus	Brazil	Meleagris gallopavo	2008
N	AEK31975	Avian coronavirus	Brazil	Meleagris gallopavo	2008
N	AEK31976	Avian coronavirus	Brazil	Meleagris gallopavo	2008
N	AEK31977	Avian coronavirus	Brazil	Meleagris gallopavo	2008
N	AEK31978	Avian coronavirus	Brazil	Meleagris gallopavo	2008
N	AEK31979	Avian coronavirus	Brazil	Meleagris gallopavo	2008
N	AEK31980	Avian coronavirus	Brazil	Meleagris gallopavo	2008
N	AEK31981	Avian coronavirus	Brazil	Meleagris gallopavo	2008
N	AEK31982	Avian coronavirus	Brazil	Meleagris gallopavo	2008
N	AEK31983	Avian coronavirus	Brazil	Meleagris gallopavo	2008
N	AEK31984	Avian coronavirus	Brazil	Meleagris gallopavo	2008
N	AFD29234	Wigeon coronavirus HKU20	China	Mareca	2008
N	AGG55745	Porcine epidemic diarrhea virus	China	Sus scrofa	2008
N	ALQ43515	Avian coronavirus	France	Meleagris gallopavo	2008
N	YP_005352871	Wigeon coronavirus HKU20	China	Mareca	2008
N	APY26781	Avian coronavirus	China	Gallus gallus	2008
N	AOC59723	Avian coronavirus	Taiwan	Gallus gallus	2008
N	APZ73652	Avian coronavirus	China	Gallus gallus	2008
N	YP_003858584	Bat coronavirus BM48-31/BGR/2008	Bulgaria	Rhinolophus blasii	2008
N	AMO03292	Avian coronavirus	Poland	Gallus gallus	2009
N	ARS22430	Avian coronavirus	South Korea	Gallus gallus	2009
N	APY23551	Avian coronavirus	China	Gallus gallus	2009
N	APY23578	Avian coronavirus	China	Gallus gallus	2009
N	APY23587	Avian coronavirus	China	Gallus gallus	2009
N	APY26710	Avian coronavirus	China	Gallus gallus	2009
N	AGC01542	Avian coronavirus	China	Gallus gallus	2009
N	AFE85962	Porcine epidemic diarrhea virus	South Korea	Sus scrofa	2009
N	ADY62552	Avian coronavirus	China	Gallus gallus	2009
N	AHB78800	Avian coronavirus	China	Gallus gallus	2009
N	AFD29187	Coronavirus HKU15	China	Sus scrofa	2009
N	AJR29313	Avian coronavirus	China	Gallus gallus	2009
N	ASM61960	Avian coronavirus	Uruguay	Gallus gallus	2009
N	APY26843	Avian coronavirus	China	Gallus gallus	2009
N	AQD20683	Avian coronavirus	China	Gallus gallus	2009
N	AQD20728	Avian coronavirus	China	Gallus gallus	2009
N	ANO81443	Avian coronavirus	China	Gallus gallus	2010
N	ARS22450	Avian coronavirus	South Korea	Gallus gallus	2010
N	ARB66108	Avian coronavirus	China	Gallus gallus	2010
N	ARB66189	Avian coronavirus	China	Gallus gallus	2010
N	APY23596	Avian coronavirus	China	Gallus gallus	2010
N	AFA51944	Alphacoronavirus 1	China	Sus scrofa	2010
N	AFJ11176	Avian coronavirus	Sweden	Gallus gallus	2010
N	ADY62542	Avian coronavirus	China	Gallus gallus	2010
N	AEP84736	Avian coronavirus	China	Gallus gallus	2010
N	AEP84746	Avian coronavirus	China	Gallus gallus	2010
N	AFD29194	Coronavirus HKU15	China	Sus scrofa	2010
N	AKG92640	Ferret coronavirus	Netherlands	Mustela putorius	2010
N	APY26789	Avian coronavirus	China	Gallus gallus	2010
N	APY26798	Avian coronavirus	China	Gallus gallus	2010
N	AQD20674	Avian coronavirus	China	Gallus gallus	2010
N	AQD20692	Avian coronavirus	China	Gallus gallus	2010
N	AQD20701	Avian coronavirus	China	Gallus gallus	2010
N	APZ73760	Avian coronavirus	China	Gallus gallus	2010
N	YP_009513021	Coronavirus HKU15	China	Sus scrofa	2010
N	AZF86130	Alphacoronavirus Bat-CoV/P.kuhlii/Italy/206679-3/2010	Italy	Pipistrellus kuhlii	2010
N	YP_009256197	Ferret coronavirus	Netherlands	Mustela putorius	2010
N	ARS22440	Avian coronavirus	South Korea	Gallus gallus	2011
N	AQY55893	Avian coronavirus	China	Gallus gallus	2011
N	ARB66126	Avian coronavirus	China	Gallus gallus	2011
N	ARB66198	Avian coronavirus	China	Gallus gallus	2011
N	AQY55848	Avian coronavirus	China	Gallus gallus	2011
N	AQY55812	Avian coronavirus	China	Gallus gallus	2011
N	AQY55821	Avian coronavirus	China	Gallus gallus	2011
N	AQY55884	Avian coronavirus	China	Gallus gallus	2011
N	ANI87711	Avian coronavirus	China	Gallus gallus	2011
N	AUM60014	Middle East respiratory syndrome-related coronavirus	Italy	Hypsugo savii	2011
N	AFB74177	Porcine epidemic diarrhea virus	China	Sus scrofa	2011
N	AFB74178	Porcine epidemic diarrhea virus	China	Sus scrofa	2011
N	AFB74179	Porcine epidemic diarrhea virus	China	Sus scrofa	2011
N	AFB74180	Porcine epidemic diarrhea virus	China	Sus scrofa	2011
N	AFB74181	Porcine epidemic diarrhea virus	China	Sus scrofa	2011
N	AFB74182	Porcine epidemic diarrhea virus	China	Sus scrofa	2011
N	AIG54283	Avian coronavirus	Australia	Gallus gallus	2011
N	AHX37558	Severe acute respiratory syndrome-related coronavirus	China	Rhinolophus affinis	2011
N	AGY29650	Middle East respiratory syndrome-related coronavirus	South Africa	Neoromicia capensis	2011
N	AFU35747	Porcine epidemic diarrhea virus	China	Sus scrofa	2011
N	AFU35750	Porcine epidemic diarrhea virus	China	Sus scrofa	2011
N	AGC74176	Severe acute respiratory syndrome-related coronavirus	China	Chaerephon plicatus	2011
N	AGZ84516	Alphacoronavirus 1	USA	Felis catus	2011
N	AGZ84526	Alphacoronavirus 1	USA	Felis catus	2011
N	AGZ84536	Alphacoronavirus 1	USA	Felis catus	2011
N	AGE13891	Avian coronavirus	China	Gallus gallus	2011
N	AJT47878	Avian coronavirus	China	Gallus gallus	2011
N	AJT47887	Avian coronavirus	China	Gallus gallus	2011
N	AJT47896	Avian coronavirus	China	Gallus gallus	2011
N	AJT47941	Avian coronavirus	China	Gallus gallus	2011
N	AJT47959	Avian coronavirus	China	Gallus gallus	2011
N	AIA62200	Bat coronavirus 1A	China	Miniopterus fuliginosus	2011
N	AIA62246	Myotis ricketti alphacoronavirus Sax-2011	China	Myotis ricketti	2011
N	ALC78738	Avian coronavirus	China	Gallus gallus	2011
N	ASM61973	Avian coronavirus	Uruguay	Gallus gallus	2011
N	AUM60024	Middle East respiratory syndrome-related coronavirus	Italy	Pipistrellus kuhlii	2011
N	AZF86118	Alphacoronavirus Bat-CoV/P.kuhlii/Italy/206645-41/2011	Italy	Pipistrellus kuhlii	2011
N	APY26736	Avian coronavirus	China	Gallus gallus	2011
N	APY26754	Avian coronavirus	China	Gallus gallus	2011
N	APY26763	Avian coronavirus	China	Gallus gallus	2011
N	APW85767	Avian coronavirus	China	Gallus gallus	2011
N	AQD20710	Avian coronavirus	China	Gallus gallus	2011
N	QDA76273	Avian coronavirus	China	Gallus	2011
N	AZA07860	Avian coronavirus	China	Gallus	2011
N	QDA76282	Avian coronavirus	China	Gallus	2011
N	YP_009199609	Myotis ricketti alphacoronavirus Sax-2011	China	Myotis ricketti	2011
N	AMZ01557	Porcine epidemic diarrhea virus	China	Sus scrofa	2012
N	ARO76382	Severe acute respiratory syndrome-related coronavirus	China	Chiroptera	2012
N	AQY03959	Avian coronavirus	China	Gallus gallus	2012
N	AQY55839	Avian coronavirus	China	Gallus gallus	2012
N	AMB66488	Alphacoronavirus 1	China	Sus scrofa	2012
N	AFP36389	Porcine epidemic diarrhea virus	China	Sus scrofa	2012
N	AGZ20168	Avian coronavirus		Gallus gallus	2012
N	AGX27799	Hedgehog coronavirus 1	Germany	Erinaceus europaeus	2012
N	AGX27810	Hedgehog coronavirus 1	Germany	Erinaceus europaeus	2012
N	AFU35748	Porcine epidemic diarrhea virus	China	Sus scrofa	2012
N	AFU35749	Porcine epidemic diarrhea virus	China	Sus scrofa	2012
N	AFU35751	Porcine epidemic diarrhea virus	China	Sus scrofa	2012
N	AFU35752	Porcine epidemic diarrhea virus	China	Sus scrofa	2012
N	AFU35753	Porcine epidemic diarrhea virus	China	Sus scrofa	2012
N	AFU35754	Porcine epidemic diarrhea virus	China	Sus scrofa	2012
N	AGG55750	Porcine epidemic diarrhea virus	China	Sus scrofa	2012
N	AJT47869	Avian coronavirus	China	Gallus gallus	2012
N	AJP16721	Avian coronavirus	China	Gallus gallus	2012
N	AIA62206	Bat coronavirus 1A	China	Miniopterus fuliginosus	2012
N	AIA62212	Miniopterus bat coronavirus HKU8	China	Miniopterus fuliginosus	2012
N	AIA62227	Miniopterus bat coronavirus HKU8	China	Miniopterus fuliginosus	2012
N	AIA62259	BtRf-AlphaCoV/YN2012	China	Rhinolophus ferrumequinum	2012
N	AIA62277	Severe acute respiratory syndrome-related coronavirus	China	Rhinolophus ferrumequinum	2012
N	AIA62352	Tylonycteris bat coronavirus HKU4	China	Tylonycteris pachypus	2012
N	ALE71331	Avian coronavirus	India	Gallus gallus	2012
N	AKQ63083	Coronavirus HKU15	China	Sus scrofa	2012
N	ATJ01093	Avian coronavirus	China	Gallus gallus	2012
N	AVI69519	Avian coronavirus	China	Gallus gallus	2012
N	YP_009200735	BtRf-AlphaCoV/YN2012	China	Rhinolophus ferrumequinum	2012
N	ARI44809	Bat coronavirus	China	Rhinolophus ferrumequinum	2012
N	APY26852	Avian coronavirus	China	Gallus gallus	2012
N	APY26861	Avian coronavirus	China	Gallus gallus	2012
N	AQD20719	Avian coronavirus	China	Gallus gallus	2012
N	YP_009513010	Hedgehog coronavirus 1	Germany	Erinaceus europaeus	2012
N	AQK38168	Porcine epidemic diarrhea virus	China	Sus scrofa	2013
N	AQY03968	Avian coronavirus	China	Gallus gallus	2013
N	APX44047	Avian coronavirus	China	Gallus gallus	2013
N	APY23497	Avian coronavirus	China	Gallus gallus	2013
N	APY23506	Avian coronavirus	China	Gallus gallus	2013
N	APY23515	Avian coronavirus	China	Gallus gallus	2013
N	AQY55866	Avian coronavirus	China	Gallus gallus	2013
N	AVX27612	Avian coronavirus	India	Gallus gallus	2013
N	AMD11130	Alphacoronavirus 1	Belgium	Felis catus	2013
N	AMD11142	Alphacoronavirus 1	Belgium	Felis catus	2013
N	AMD11153	Alphacoronavirus 1	Belgium	Felis catus	2013
N	AMD11164	Alphacoronavirus 1	Belgium	Felis catus	2013
N	AMD11175	Alphacoronavirus 1	Belgium	Felis catus	2013
N	AMD11186	Alphacoronavirus 1	Belgium	Felis catus	2013
N	AMD11197	Alphacoronavirus 1	Belgium	Felis catus	2013
N	AMD11208	Alphacoronavirus 1	Belgium	Felis catus	2013
N	AMD11219	Alphacoronavirus 1	Belgium	Felis catus	2013
N	AMD11230	Alphacoronavirus 1	Belgium	Felis catus	2013
N	AIM47748	Porcine epidemic diarrhea virus	USA	Sus scrofa	2013
N	APU57645	Lucheng Rn rat coronavirus	China	Rattus norvegicus	2013
N	AGY31028	Porcine epidemic diarrhea virus	USA	Sus scrofa	2013
N	AGY31034	Porcine epidemic diarrhea virus	USA	Sus scrofa	2013
N	AJT47842	Avian coronavirus	China	Gallus gallus	2013
N	AJT47914	Avian coronavirus	China	Gallus gallus	2013
N	AJT47923	Avian coronavirus	China	Gallus gallus	2013
N	AJT47932	Avian coronavirus	China	Gallus gallus	2013
N	AJT47950	Avian coronavirus	China	Gallus gallus	2013
N	AJP16730	Avian coronavirus	China	Gallus gallus	2013
N	AJP16739	Avian coronavirus	China	Gallus gallus	2013
N	AJH76957	Porcine epidemic diarrhea virus	China	Sus scrofa	2013
N	AKJ66253	Avian coronavirus	China	Gallus gallus	2013
N	AIA62220	Miniopterus bat coronavirus HKU8	China	Miniopterus fuliginosus	2013
N	AIA62234	Miniopterus bat coronavirus HKU8	China	Miniopterus fuliginosus	2013
N	AIA62252	Rhinolophus ferrumequinum alphacoronavirus HuB-2013	China	Rhinolophus ferrumequinum	2013
N	AIA62265	Nyctalus velutinus alphacoronavirus SC-2013	China	Nyctalus velutinus	2013
N	AIA62271	Rhinolophus ferrumequinum alphacoronavirus HuB-2013	China	Myotis sp.	2013
N	AIA62290	Severe acute respiratory syndrome-related coronavirus	China	Rhinolophus ferrumequinum	2013
N	AIA62300	Severe acute respiratory syndrome-related coronavirus	China	Rhinolophus ferrumequinum	2013
N	AIA62310	Severe acute respiratory syndrome-related coronavirus	China	Rhinolophus sinicus	2013
N	AIA62320	Severe acute respiratory syndrome-related coronavirus	China	Rhinolophus sinicus	2013
N	AIA62330	Severe acute respiratory syndrome-related coronavirus	China	Rhinolophus sinicus	2013
N	AIA62343	Pipistrellus bat coronavirus HKU5	China	Pipistrellus abramus	2013
N	AHL18090	Middle East respiratory syndrome-related coronavirus	Egypt	Camelus dromedarius	2013
N	QDI73610	Middle East respiratory syndrome-related coronavirus	Egypt	Camelus dromedarius	2013
N	AIY51828	Avian coronavirus	China	Gallus gallus	2013
N	ALC78747	Avian coronavirus	China	Gallus gallus	2013
N	AIF73529	Porcine epidemic diarrhea virus	Viet Nam	Sus scrofa	2013
N	AIF73535	Porcine epidemic diarrhea virus	Viet Nam	Sus scrofa	2013
N	AIF73541	Porcine epidemic diarrhea virus	Viet Nam	Sus scrofa	2013
N	AXQ05191	Avian coronavirus	Brazil	Gallus gallus	2013
N	YP_009336484	Lucheng Rn rat coronavirus	China	Rattus norvegicus	2013
N	ATJ01103	Avian coronavirus	China	Gallus gallus	2013
N	YP_009199790	Rhinolophus ferrumequinum alphacoronavirus HuB-2013	China	Rhinolophus ferrumequinum	2013
N	ARI44804	Bat coronavirus	China	Rhinolophus sinicus	2013
N	ARI44789	Bat coronavirus	China	Myotis siligorensis	2013
N	ARI44794	Bat coronavirus	China	Myotis davidii	2013
N	ARI44799	Bat coronavirus	China	Rhinolophus sinicus	2013
N	APY26807	Avian coronavirus	China	Gallus gallus	2013
N	ANY59000	Avian coronavirus	Brazil	Gallus gallus	2013
N	APZ73661	Avian coronavirus	China	Gallus gallus	2013
N	APZ73697	Avian coronavirus	China	Gallus gallus	2013
N	APZ73724	Avian coronavirus	China	Gallus gallus	2013
N	APZ73742	Avian coronavirus	China	Gallus gallus	2013
N	APZ73751	Avian coronavirus	China	Gallus gallus	2013
N	APZ73778	Avian coronavirus	China	Gallus gallus	2013
N	AXQ05201	Avian coronavirus	Brazil	Gallus gallus	2013
N	QDA76327	Avian coronavirus	China	Gallus	2013
N	YP_009201730	Nyctalus velutinus alphacoronavirus SC-2013	China	Nyctalus velutinus	2013
N	ANO81454	Avian coronavirus	China	Gallus gallus	2014
N	ASY91956	Porcine epidemic diarrhea virus	USA	Sus scrofa	2014
N	ASY91957	Porcine epidemic diarrhea virus	USA	Sus scrofa	2014
N	ARB66144	Avian coronavirus	China	Gallus gallus	2014
N	APX44038	Avian coronavirus	China	Gallus gallus	2014
N	APX44056	Avian coronavirus	China	Gallus gallus	2014
N	AQY55875	Avian coronavirus	China	Gallus gallus	2014
N	AQT26498	Betacoronavirus 1	China	Canis lupus familiaris	2014
N	AQY55857	Avian coronavirus	China	Gallus gallus	2014
N	APZ73816	Avian coronavirus	China	Gallus gallus	2014
N	AKS25225	Avian coronavirus	China	Gallus gallus	2014
N	AKS25234	Avian coronavirus	China	Gallus gallus	2014
N	AKS25243	Avian coronavirus	China	Gallus gallus	2014
N	AKS25252	Avian coronavirus	China	Gallus gallus	2014
N	AJT47851	Avian coronavirus	China	Gallus gallus	2014
N	AJT47860	Avian coronavirus	China	Gallus gallus	2014
N	AJT47905	Avian coronavirus	China	Gallus gallus	2014
N	AJP16712	Avian coronavirus	China	Gallus gallus	2014
N	AKF17724	Avian coronavirus	China	Anatidae	2014
N	AHY04230	Porcine epidemic diarrhea virus	South Korea	Sus scrofa	2014
N	AOI28259	Human coronavirus 229E	Saudi Arabia	Camelus dromedarius	2014
N	AOI28267	Human coronavirus 229E	Saudi Arabia	Camelus dromedarius	2014
N	AOI28275	Human coronavirus 229E	Saudi Arabia	Camelus dromedarius	2014
N	AOI28283	Human coronavirus 229E	Saudi Arabia	Camelus dromedarius	2014
N	AOI28291	Human coronavirus 229E	Saudi Arabia	Camelus dromedarius	2014
N	AUG59156	Coronavirus HKU15	China	Sus scrofa	2014
N	AUG59164	Coronavirus HKU15	China	Sus scrofa	2014
N	ARS23152	Avian coronavirus	Egypt	Gallus gallus	2014
N	ARS23139	Avian coronavirus	Egypt	Gallus gallus	2014
N	AUV64572	Porcine epidemic diarrhea virus	USA		2014
N	AQY61323	Avian coronavirus	China	Gallus gallus	2014
N	AQY61305	Avian coronavirus	China	Gallus gallus	2014
N	AQY61314	Avian coronavirus	China	Gallus gallus	2014
N	ASR75145	Coronavirus HKU15	China	Sus scrofa	2014
N	QDA76336	Avian coronavirus	China	Gallus	2014
N	AVI15044	Betacoronavirus 1	France	Bos taurus	2014
N	AVI15033	Betacoronavirus 1	France	Bos taurus	2014
N	AVI15022	Betacoronavirus 1	France	Bos taurus	2014
N	APZ73769	Avian coronavirus	China	Gallus gallus	2014
N	QDY92469	Porcine epidemic diarrhea virus	South Korea	Sus scrofa	2014
N	QDY92475	Porcine epidemic diarrhea virus	South Korea	Sus scrofa	2014
N	AVI15000	Betacoronavirus 1	France	Bos taurus	2014
N	AVI15011	Betacoronavirus 1	France	Bos taurus	2014
N	AZN28593	Porcine epidemic diarrhea virus	China	Sus scrofa	2014
N	AYA44731	Avian coronavirus	USA	Gallus gallus	2014
N	AYA44691	Avian coronavirus	USA	Gallus gallus	2014
N	QAA92377	Avian coronavirus	Malaysia	Gallus gallus	2014
N	QCC20713	Hedgehog coronavirus 1	United Kingdom	Erinaceus europaeus	2014
N	QEH60463	Bat coronavirus	Singapore	Cynopterus brachyotis	2015
N	API61790	Avian coronavirus	China	Gallus gallus	2015
N	APQ31244	Alphacoronavirus 1	China	Sus scrofa	2015
N	ASR18938	Ferret coronavirus	USA	Mustela putorius furo	2015
N	ASR18946	Ferret coronavirus	USA	Mustela putorius furo	2015
N	AMD40263	Avian coronavirus	China	Gallus gallus	2015
N	AOG74789	Human coronavirus 229E	Kenya	Camelus dromedarius	2015
N	ATY72312	Porcine epidemic diarrhea virus	China	Sus scrofa	2015
N	ATY72306	Porcine epidemic diarrhea virus	China	Sus scrofa	2015
N	ASR75139	Coronavirus HKU15	China	Sus scrofa	2015
N	ATI09437	Human coronavirus 229E	United Arab Emirates	Camelus	2015
N	YP_009389425	Wencheng Sm shrew coronavirus	China	Suncus murinus	2015
N	APY26772	Avian coronavirus	China	Gallus gallus	2015
N	APZ73715	Avian coronavirus	China	Gallus gallus	2015
N	QAA92387	Avian coronavirus	Malaysia	Gallus gallus	2015
N	AYA44701	Avian coronavirus	USA	Gallus gallus	2015
N	AZF86124	Alphacoronavirus Bat-CoV/P.kuhlii/Italy/3398-19/2015	Italy	Pipistrellus kuhlii	2015
N	AYF53093	Feline alphacoronavirus 1	Brazil	Felis catus	2015
N	APG38198	Coronavirus HKU15	China	Sus scrofa	2016
N	APR64495	Porcine epidemic diarrhea virus	China	Sus scrofa	2016
N	AQS99154	Coronavirus HKU15	China		2016
N	QGR15739	Avian coronavirus	China	Gallus gallus	2016
N	AVR48519	Coronavirus HKU15	China	Sus scrofa	2016
N	AQY61369	Avian coronavirus	China	Gallus gallus	2016
N	AVY53336	Alphacoronavirus Mink/China/1/2016	China	Mustela lutreola	2016
N	QEI10561	Avian coronavirus	China	Gallus gallus	2016
N	AZP23930	Avian coronavirus	Canada	Gallus gallus	2016
N	AZA07514	Avian coronavirus	China	Gallus	2016
N	ARJ35791	Avian coronavirus	Brazil		2016
N	ARJ35789	Avian coronavirus	Brazil		2016
N	QCT24237	Porcine epidemic diarrhea virus	China	Sus scrofa	2016
N	QDA76291	Avian coronavirus	China	Gallus	2016
N	AZP23949	Avian coronavirus	Canada	Gallus gallus	2016
N	AYA44721	Avian coronavirus	USA	Gallus gallus	2016
N	AYA44711	Avian coronavirus	USA	Gallus gallus	2016
N	QDA76246	Avian coronavirus	China	Gallus	2016
N	QDA76237	Avian coronavirus	China	Gallus	2016
N	QCX41896	Avian coronavirus	China		2016
N	AYU65233	Coronavirus HKU15	China	Sus scrofa	2016
N	QGM12429	Avian coronavirus	Canada	Gallus gallus	2017
N	QGM12416	Avian coronavirus	Canada	Gallus gallus	2017
N	QGM12391	Avian coronavirus	Canada	Gallus gallus	2017
N	QGM12378	Avian coronavirus	Canada	Gallus gallus	2017
N	QGM12404	Avian coronavirus	Canada	Gallus gallus	2017
N	ATN23889	Rhinolophus bat coronavirus HKU2	China	Sus scrofa	2017
N	AVM80632	Swine acute diarrhea syndrome coronavirus	China	Sus scrofa	2017
N	AVM80596	Swine acute diarrhea syndrome coronavirus	China	Sus scrofa	2017
N	AVM80677	Swine acute diarrhea syndrome coronavirus	China	Sus scrofa	2017
N	AVM80650	Swine acute diarrhea syndrome coronavirus	China	Sus scrofa	2017
N	AVM80560	Swine acute diarrhea syndrome coronavirus	China	Sus scrofa	2017
N	AVM80713	Swine acute diarrhea syndrome coronavirus	China	Sus scrofa	2017
N	AVM80524	Swine acute diarrhea syndrome coronavirus	China	Sus scrofa	2017
N	AVM80722	Swine acute diarrhea syndrome coronavirus	China	Sus scrofa	2017
N	AVM80533	Swine acute diarrhea syndrome coronavirus	China	Sus scrofa	2017
N	AVM80749	Swine acute diarrhea syndrome coronavirus	China	Sus scrofa	2017
N	AVI69453	Avian coronavirus	China	Gallus gallus	2017
N	AVM80695	Swine acute diarrhea syndrome coronavirus	China	Sus scrofa	2017
N	AVM80614	Swine acute diarrhea syndrome coronavirus	China	Sus scrofa	2017
N	AVM80704	Swine acute diarrhea syndrome coronavirus	China	Sus scrofa	2017
N	AVM80668	Swine acute diarrhea syndrome coronavirus	China	Sus scrofa	2017
N	AVM80605	Swine acute diarrhea syndrome coronavirus	China	Sus scrofa	2017
N	AVM80659	Swine acute diarrhea syndrome coronavirus	China	Sus scrofa	2017
N	AVM80587	Swine acute diarrhea syndrome coronavirus	China	Sus scrofa	2017
N	AVM80641	Swine acute diarrhea syndrome coronavirus	China	Sus scrofa	2017
N	AVM80758	Swine acute diarrhea syndrome coronavirus	China	Sus scrofa	2017
N	AVM80551	Swine acute diarrhea syndrome coronavirus	China	Sus scrofa	2017
N	AVM80740	Swine acute diarrhea syndrome coronavirus	China	Sus scrofa	2017
N	AVM80569	Swine acute diarrhea syndrome coronavirus	China	Sus scrofa	2017
N	AVM80776	Swine acute diarrhea syndrome coronavirus	China	Sus scrofa	2017
N	AVM80731	Swine acute diarrhea syndrome coronavirus	China	Sus scrofa	2017
N	AVM80767	Swine acute diarrhea syndrome coronavirus	China	Sus scrofa	2017
N	AVM80623	Swine acute diarrhea syndrome coronavirus	China	Sus scrofa	2017
N	AVM80686	Swine acute diarrhea syndrome coronavirus	China	Sus scrofa	2017
N	AVM80578	Swine acute diarrhea syndrome coronavirus	China	Sus scrofa	2017
N	AVM80542	Swine acute diarrhea syndrome coronavirus	China	Sus scrofa	2017
N	AZA07833	Avian coronavirus	China	Gallus	2017
N	AVZ61082	Coronavirus HKU15	China	Sus scrofa	2017
N	QDA76255	Avian coronavirus	China	Phasianinae	2017
N	AWV67125	Sparrow deltacoronavirus	USA	Passeridae	2017
N	AWV67116	Sparrow deltacoronavirus	USA	Passeridae	2017
N	AWV67107	Sparrow deltacoronavirus	USA	Passeridae	2017
N	AWV67134	Sparrow deltacoronavirus	USA	Passeridae	2017
N	AZA07824	Avian coronavirus	China	Gallus	2017
N	QDA76300	Avian coronavirus	China	Gallus	2017
N	QDA76228	Avian coronavirus	China	Gallus	2017
N	QDA76219	Avian coronavirus	China	Gallus	2017
N	AZA07842	Avian coronavirus	China	Gallus	2017
N	AZU96327	Betacoronavirus 1	China	Bos grunniens	2017
N	AZA07856	Avian coronavirus	China	Gallus	2017
N	QDA76264	Avian coronavirus	China	Phasianinae	2017
N	QGX41969	Alphacoronavirus sp.	Australia		2018
N	QGX41945	Alphacoronavirus sp.	Australia		2018
N	QGX41957	Alphacoronavirus sp.	Australia		2018
N	QGX41963	Alphacoronavirus sp.	Australia		2018
N	QGX41951	Alphacoronavirus sp.	Australia		2018
N	QCC26602	Porcine epidemic diarrhea virus	China	Sus scrofa	2018
N	QEH62669	Swine enteric alphacoronavirus	China	Sus scrofa	2018
N	QCC26595	Porcine epidemic diarrhea virus	China	Sus scrofa	2018
N	QDY92481	Porcine epidemic diarrhea virus	South Korea	Sus scrofa	2018
N	QCC26581	Porcine epidemic diarrhea virus	China	Sus scrofa	2018
N	QCC26588	Porcine epidemic diarrhea virus	China	Sus scrofa	2018
N	AFO11507	Murine coronavirus	USA		1947-08-14
N	AFO11517	Murine coronavirus	USA		1947-08-14
N	ALJ77587	Avian coronavirus	Iran	Aves	1987-10-10
N	ALJ77588	Avian coronavirus	Iran	Aves	1987-10-10
N	QDQ69095	Avian coronavirus	Poland	Gallus gallus	1989-06-08
N	QDQ69121	Avian coronavirus	Poland	Gallus gallus	1989-06-08
N	QDQ69108	Avian coronavirus	Poland	Gallus gallus	1989-06-08
N	ACT10948	Alphacoronavirus 1	USA	Felis catus	1993-03-30
N	ACJ66946	Betacoronavirus 1	USA	Kobus ellipsiprymnus	1994-01-01
N	ACJ66961	Betacoronavirus 1	USA	Kobus ellipsiprymnus	1994-01-01
N	ACJ66971	Betacoronavirus 1	USA	Kobus ellipsiprymnus	1994-01-01
N	ACJ66977	Betacoronavirus 1	USA	Odocoileus virginianus	1994-01-01
N	ACJ66990	Betacoronavirus 1	USA	Rusa unicolor	1994-01-01
N	ACJ67000	Betacoronavirus 1	USA	Rusa unicolor	1994-01-01
N	ACJ67012	Betacoronavirus 1	USA	Rusa unicolor	1994-01-01
N	ACT11019	Betacoronavirus 1	USA	Bos taurus	1996-01-01
N	ACT10983	Betacoronavirus 1	USA	Bos taurus	1996-11-30
N	QDQ69134	Avian coronavirus	Poland	Gallus gallus	1997-07-01
N	QDQ69147	Avian coronavirus	Poland	Gallus gallus	1997-09-01
N	ADI80513	Mink coronavirus 1	USA	Neovison vison	1998-01-01
N	ADI80523	Alphacoronavirus 2	USA	Neovison vison	1998-01-01
N	YP_009019182	Mink coronavirus 1	USA	Neovison vison	1998-01-01
N	AML22777	Alphacoronavirus 1	China	Sus scrofa	1998-02-10
N	ACT10959	Alphacoronavirus 1	USA	Felis catus	1998-03-10
N	ACT11007	Betacoronavirus 1	USA	Bos taurus	2000-01-01
N	ACT10995	Betacoronavirus 1	USA	Bos taurus	2000-01-01
N	ASW30994	Porcine epidemic diarrhea virus	South Korea	Sus scrofa	2001-07-01
N	APV46148	Avian coronavirus	China	Gallus gallus	2002-01-01
N	ACT10854	Alphacoronavirus 1	USA	Felis catus	2002-01-28
N	ACH72804	Avian coronavirus	China	Gallus gallus	2002-11-01
N	AFD56973	Severe acute respiratory syndrome-related coronavirus	United Kingdom		2003-04-16
N	AFK10254	Severe acute respiratory syndrome-related coronavirus	United Kingdom		2003-04-16
N	ABA02260	Severe acute respiratory syndrome-related coronavirus	China		2003-04-21
N	AEO86768	Avian coronavirus	China	Anatidae	2004-05-01
N	AEO88934	Avian coronavirus	China	Anatidae	2004-05-01
N	AKC54428	Coronavirus HKU15	China	Sus scrofa	2004-05-24
N	QDQ69160	Avian coronavirus	Poland	Gallus gallus	2004-09-23
N	AEB00706	Avian coronavirus	China	Gallus gallus	2005-08-15
N	AFU92104	Bat coronavirus HKU10	China	Chiroptera	2005-10-01
N	AFU92113	Bat coronavirus HKU10	China	Chiroptera	2005-10-01
N	YP_006908642	Bat coronavirus HKU10	China	Chiroptera	2005-10-01
N	AFU92095	Bat coronavirus HKU10	Hong Kong	Chiroptera	2005-12-01
N	ADM33558	Rousettus bat coronavirus HKU9	China	Chiroptera	2005-12-11
N	ADM33566	Rousettus bat coronavirus HKU9	China	Chiroptera	2005-12-11
N	ACN89689	Murine coronavirus	USA	Mus musculus	2006-01-01
N	ADM33574	Rousettus bat coronavirus HKU9	China	Chiroptera	2006-04-10
N	ADM33582	Rousettus bat coronavirus HKU9	China	Chiroptera	2006-04-10
N	APV46102	Avian coronavirus	China	Gallus gallus	2006-05-01
N	AGT21333	Bat coronavirus CDPHE15	USA	Myotis lucifugus	2006-08-07
N	YP_008439202	Bat coronavirus CDPHE15	USA	Myotis lucifugus	2006-08-07
N	AFU92086	Bat coronavirus HKU10	Hong Kong	Chiroptera	2006-10-01
N	ASV64295	Alphacoronavirus 1	USA		2006-11-08
N	ASV64304	Alphacoronavirus 1	USA		2006-11-17
N	AFU92070	Bat coronavirus HKU10	Hong Kong	Chiroptera	2006-12-01
N	AFU92078	Bat coronavirus HKU10	Hong Kong	Chiroptera	2006-12-01
N	ASV64277	Alphacoronavirus 1	USA		2006-12-08
N	ACJ12035	Bulbul coronavirus HKU11	Hong Kong	Pycnonotus jocosus	2007-01-01
N	ACJ12044	Bulbul coronavirus HKU11	Hong Kong	Pycnonotus sinensis	2007-01-01
N	ACJ12053	Thrush coronavirus HKU12	Hong Kong	Turdus hortulorum	2007-01-01
N	YP_002308497	Thrush coronavirus HKU12	Hong Kong	Turdus hortulorum	2007-01-01
N	YP_002308479	Bulbul coronavirus HKU11	Hong Kong	Pycnonotus jocosus	2007-01-01
N	APV46094	Avian coronavirus	China	Gallus gallus	2007-02-01
N	ACT10887	Alphacoronavirus 1	Netherlands	Felis catus	2007-02-02
N	ASV64313	Alphacoronavirus 1	USA		2007-02-08
N	ASV64322	Alphacoronavirus 1	USA		2007-02-08
N	ASV64331	Alphacoronavirus 1	USA		2007-02-16
N	ACT10906	Alphacoronavirus 1	Netherlands	Felis catus	2007-03-07
N	ACJ12062	Munia coronavirus HKU13	Hong Kong	Lonchura striata	2007-04-01
N	YP_002308506	Munia coronavirus HKU13	Hong Kong	Lonchura striata	2007-04-01
N	ACT10876	Alphacoronavirus 1	Netherlands	Felis catus	2007-04-25
N	AEL12221	Avian coronavirus	China	Gallus gallus	2007-05-07
N	ACT10896	Alphacoronavirus 1	Netherlands	Felis catus	2007-05-24
N	ACT10970	Alphacoronavirus 1	Netherlands	Felis catus	2007-05-24
N	ACT10865	Alphacoronavirus 1	Netherlands	Felis catus	2007-06-05
N	ACT10937	Alphacoronavirus 1	Netherlands	Felis catus	2007-06-05
N	ACT10927	Alphacoronavirus 1	Netherlands	Felis catus	2007-06-07
N	ACT10916	Alphacoronavirus 1	Netherlands	Felis catus	2007-07-13
N	ADL71446	Alphacoronavirus 1	Netherlands	Feliformia	2007-07-17
N	ADL71455	Alphacoronavirus 1	Netherlands	Feliformia	2007-07-24
N	APO40579	Severe acute respiratory syndrome-related coronavirus	Kenya	Rhinolophus	2007-08-01
N	ADO39828	Alphacoronavirus 1	Netherlands	Feliformia	2007-08-23
N	ADO39839	Alphacoronavirus 1	Netherlands	Feliformia	2007-08-23
N	AEB00715	Avian coronavirus	China	Gallus gallus	2007-08-25
N	ACZ71782	Severe acute respiratory syndrome-related coronavirus	USA		2007-08-28
N	ACS44218	Alphacoronavirus 1	Taiwan	Felis catus	2007-09-01
N	ADL71466	Alphacoronavirus 1	Netherlands	Feliformia	2007-09-11
N	ADL71497	Alphacoronavirus 1	Netherlands	Felis catus	2007-09-11
N	ADC35461	Alphacoronavirus 1	Netherlands	Feliformia	2007-09-13
N	ADC35472	Alphacoronavirus 1	Netherlands	Feliformia	2007-09-13
N	ACZ71752	Severe acute respiratory syndrome-related coronavirus	USA		2007-09-22
N	ACZ71811	Severe acute respiratory syndrome-related coronavirus	USA		2007-09-22
N	ACZ71931	Severe acute respiratory syndrome-related coronavirus	USA		2007-09-22
N	ACZ71767	Severe acute respiratory syndrome-related coronavirus	USA		2007-09-26
N	AHB73999	Avian coronavirus	China	Gallus gallus	2007-11-01
N	ADC35511	Severe acute respiratory syndrome-related coronavirus	USA	Chlorocebus aethiops	2007-12-05
N	ADL71476	Alphacoronavirus 1	Netherlands	Feliformia	2008-01-03
N	ADO39817	Alphacoronavirus 1	Netherlands	Felis catus	2008-01-22
N	ADO39850	Alphacoronavirus 1	Netherlands	Feliformia	2008-01-22
N	ADL71486	Alphacoronavirus 1	Netherlands	Feliformia	2008-01-25
N	ASV64340	Alphacoronavirus 1	USA		2008-03-06
N	ACZ71797	Severe acute respiratory syndrome-related coronavirus	USA		2008-03-28
N	ACZ71826	Severe acute respiratory syndrome-related coronavirus	USA		2008-03-28
N	ACZ71841	Severe acute respiratory syndrome-related coronavirus	USA		2008-03-28
N	ACZ71856	Severe acute respiratory syndrome-related coronavirus	USA		2008-03-28
N	ACZ71871	Severe acute respiratory syndrome-related coronavirus	USA		2008-03-28
N	ACZ71886	Severe acute respiratory syndrome-related coronavirus	USA		2008-03-28
N	ACZ71901	Severe acute respiratory syndrome-related coronavirus	USA		2008-03-28
N	ACZ71916	Severe acute respiratory syndrome-related coronavirus	USA		2008-03-28
N	ACZ71946	Severe acute respiratory syndrome-related coronavirus	USA		2008-03-28
N	ACZ71976	Severe acute respiratory syndrome-related coronavirus	USA		2008-03-28
N	ACZ72020	Severe acute respiratory syndrome-related coronavirus	USA		2008-03-28
N	ACZ72050	Severe acute respiratory syndrome-related coronavirus	USA		2008-03-28
N	ACZ72065	Severe acute respiratory syndrome-related coronavirus	USA		2008-03-28
N	ACZ72093	Severe acute respiratory syndrome-related coronavirus	USA		2008-03-28
N	ACZ72180	Severe acute respiratory syndrome-related coronavirus	USA		2008-03-28
N	ASV64367	Alphacoronavirus 1	USA		2008-04-09
N	ASV64349	Alphacoronavirus 1	USA		2008-04-15
N	ASV64358	Alphacoronavirus 1	Mexico		2008-04-17
N	AHI85760	Avian coronavirus	China	Gallus gallus	2008-07-11
N	AKN20490	Avian coronavirus	China	Gallus gallus	2008-08-01
N	APD51491	NL63-related bat coronavirus strain BtKYNL63-9b	Kenya	Triaenops afer	2008-08-06
N	ACZ71961	Severe acute respiratory syndrome-related coronavirus	USA		2008-08-06
N	ACZ72108	Severe acute respiratory syndrome-related coronavirus	USA		2008-08-06
N	ACZ72166	Severe acute respiratory syndrome-related coronavirus	USA		2008-08-06
N	ACZ72195	Severe acute respiratory syndrome-related coronavirus	USA		2008-08-06
N	ACZ72254	Severe acute respiratory syndrome-related coronavirus	USA		2008-08-06
N	AEA10788	Severe acute respiratory syndrome-related coronavirus	USA	Mus musculus	2008-08-10
N	AEA10803	Severe acute respiratory syndrome-related coronavirus	USA	Mus musculus	2008-08-10
N	AEA10818	Severe acute respiratory syndrome-related coronavirus	USA	Mus musculus	2008-08-10
N	AEA10833	Severe acute respiratory syndrome-related coronavirus	USA	Mus musculus	2008-08-10
N	AUF40275	Betacoronavirus 1	China	Sus scrofa	2008-08-21
N	AEA10518	Severe acute respiratory syndrome-related coronavirus	USA	Mus musculus	2008-09-17
N	AEA10533	Severe acute respiratory syndrome-related coronavirus	USA	Mus musculus	2008-09-17
N	AEA10548	Severe acute respiratory syndrome-related coronavirus	USA	Mus musculus	2008-09-17
N	AEA10563	Severe acute respiratory syndrome-related coronavirus	USA	Mus musculus	2008-09-17
N	AEA10578	Severe acute respiratory syndrome-related coronavirus	USA	Mus musculus	2008-09-17
N	AEA10638	Severe acute respiratory syndrome-related coronavirus	USA	Mus musculus	2008-09-17
N	AEA10653	Severe acute respiratory syndrome-related coronavirus	USA	Mus musculus	2008-09-17
N	AEA10668	Severe acute respiratory syndrome-related coronavirus	USA	Mus musculus	2008-09-17
N	AEA10683	Severe acute respiratory syndrome-related coronavirus	USA	Mus musculus	2008-09-17
N	AEA10698	Severe acute respiratory syndrome-related coronavirus	USA	Mus musculus	2008-09-17
N	AEA10743	Severe acute respiratory syndrome-related coronavirus	USA	Mus musculus	2008-09-18
N	AEA10758	Severe acute respiratory syndrome-related coronavirus	USA	Mus musculus	2008-09-18
N	AEA10773	Severe acute respiratory syndrome-related coronavirus	USA	Mus musculus	2008-09-18
N	AEA10593	Severe acute respiratory syndrome-related coronavirus	USA	Mus musculus	2008-09-18
N	AEA10608	Severe acute respiratory syndrome-related coronavirus	USA	Mus musculus	2008-09-18
N	AEA10923	Severe acute respiratory syndrome-related coronavirus	USA	Mus musculus	2008-09-19
N	AEA10938	Severe acute respiratory syndrome-related coronavirus	USA	Mus musculus	2008-09-19
N	AEA10953	Severe acute respiratory syndrome-related coronavirus	USA	Mus musculus	2008-09-19
N	AEA10968	Severe acute respiratory syndrome-related coronavirus	USA	Mus musculus	2008-09-19
N	AEA10983	Severe acute respiratory syndrome-related coronavirus	USA	Mus musculus	2008-09-19
N	AEA10398	Severe acute respiratory syndrome-related coronavirus	USA	Mus musculus	2008-10-08
N	AEA10413	Severe acute respiratory syndrome-related coronavirus	USA	Mus musculus	2008-10-08
N	AEA10428	Severe acute respiratory syndrome-related coronavirus	USA	Mus musculus	2008-10-08
N	AEA10443	Severe acute respiratory syndrome-related coronavirus	USA	Mus musculus	2008-10-08
N	AEA10458	Severe acute respiratory syndrome-related coronavirus	USA	Mus musculus	2008-10-08
N	AEA10623	Severe acute respiratory syndrome-related coronavirus	USA	Mus musculus	2008-10-08
N	AEA10713	Severe acute respiratory syndrome-related coronavirus	USA	Mus musculus	2008-10-10
N	AEA10728	Severe acute respiratory syndrome-related coronavirus	USA	Mus musculus	2008-10-10
N	AEA10848	Severe acute respiratory syndrome-related coronavirus	USA	Mus musculus	2008-10-10
N	AEA10863	Severe acute respiratory syndrome-related coronavirus	USA	Mus musculus	2008-10-10
N	AEA10878	Severe acute respiratory syndrome-related coronavirus	USA	Mus musculus	2008-10-10
N	AEA10893	Severe acute respiratory syndrome-related coronavirus	USA	Mus musculus	2008-10-10
N	AEA10908	Severe acute respiratory syndrome-related coronavirus	USA	Mus musculus	2008-10-10
N	AEA10473	Severe acute respiratory syndrome-related coronavirus	USA	Mus musculus	2008-10-10
N	AEA10488	Severe acute respiratory syndrome-related coronavirus	USA	Mus musculus	2008-10-10
N	AEA10503	Severe acute respiratory syndrome-related coronavirus	USA	Mus musculus	2008-10-10
N	ADB28907	Alphacoronavirus 1	Taiwan	Canis lupus familiaris	2008-11-01
N	ACZ72005	Severe acute respiratory syndrome-related coronavirus	USA		2008-11-21
N	ACZ72035	Severe acute respiratory syndrome-related coronavirus	USA		2008-11-25
N	ACZ72078	Severe acute respiratory syndrome-related coronavirus	USA		2008-11-25
N	ACZ72136	Severe acute respiratory syndrome-related coronavirus	USA		2008-11-25
N	ACZ72210	Severe acute respiratory syndrome-related coronavirus	USA		2008-11-25
N	ACZ72225	Severe acute respiratory syndrome-related coronavirus	USA		2008-11-25
N	ACZ72269	Severe acute respiratory syndrome-related coronavirus	USA		2008-11-25
N	ACZ71991	Severe acute respiratory syndrome-related coronavirus	USA		2008-11-26
N	ACZ72122	Severe acute respiratory syndrome-related coronavirus	USA		2008-11-26
N	ACZ72151	Severe acute respiratory syndrome-related coronavirus	USA		2008-11-26
N	ACZ72240	Severe acute respiratory syndrome-related coronavirus	USA		2008-11-26
N	AYG86347	Avian coronavirus	South Korea	Gallus gallus	2008-12-11
N	ACZ72284	Severe acute respiratory syndrome-related coronavirus	USA		2008-12-18
N	AFM43867	Severe acute respiratory syndrome-related coronavirus	USA		2009-01-01
N	ALR84908	Porcine epidemic diarrhea virus	Italy	Sus scrofa	2009-01-14
N	APZ73679	Avian coronavirus	China	Gallus gallus	2009-03-01
N	AEA10998	Severe acute respiratory syndrome-related coronavirus	USA		2009-03-18
N	AEA11013	Severe acute respiratory syndrome-related coronavirus	USA		2009-03-18
N	AGT20898	Severe acute respiratory syndrome-related coronavirus	USA		2009-03-18
N	AGT21063	Severe acute respiratory syndrome-related coronavirus	USA		2009-03-18
N	AGT21093	Severe acute respiratory syndrome-related coronavirus	USA		2009-03-18
N	AGT21243	Severe acute respiratory syndrome-related coronavirus	USA		2009-03-18
N	ADD62481	Avian coronavirus	China	Gallus gallus	2009-04-01
N	APY26726	Avian coronavirus	China	Gallus gallus	2009-05-01
N	AGT20808	Severe acute respiratory syndrome-related coronavirus	USA		2009-05-19
N	AGT20913	Severe acute respiratory syndrome-related coronavirus	USA		2009-05-19
N	AGT20928	Severe acute respiratory syndrome-related coronavirus	USA		2009-05-19
N	AGT21138	Severe acute respiratory syndrome-related coronavirus	USA		2009-05-19
N	AGT21258	Severe acute respiratory syndrome-related coronavirus	USA		2009-05-19
N	AGT21273	Severe acute respiratory syndrome-related coronavirus	USA		2009-05-19
N	APD51499	Human coronavirus 229E	Kenya	Hipposideros	2009-06-20
N	AGT20883	Severe acute respiratory syndrome-related coronavirus	USA		2009-07-08
N	AGT21108	Severe acute respiratory syndrome-related coronavirus	USA		2009-07-08
N	AGT21123	Severe acute respiratory syndrome-related coronavirus	USA		2009-07-08
N	AGT21153	Severe acute respiratory syndrome-related coronavirus	USA		2009-07-08
N	AGT21183	Severe acute respiratory syndrome-related coronavirus	USA		2009-07-08
N	AGT21318	Severe acute respiratory syndrome-related coronavirus	USA		2009-07-08
N	APZ73733	Avian coronavirus	China	Gallus gallus	2009-08-01
N	APY26879	Avian coronavirus	China	Gallus gallus	2009-09-01
N	APZ73688	Avian coronavirus	China	Gallus gallus	2009-09-01
N	ALR84915	Alphacoronavirus 1	Italy	Sus scrofa	2009-09-04
N	YP_009199242	Alphacoronavirus 1	Italy	Sus scrofa	2009-09-04
N	AHX26055	Avian coronavirus	China	Gallus gallus	2009-09-08
N	AHX26100	Avian coronavirus	China	Gallus gallus	2009-09-09
N	APZ73825	Avian coronavirus	China	Gallus gallus	2009-11-01
N	AVP25406	Rousettus bat coronavirus HKU9	China	Rousettus sp.	2009-11-01
N	AGZ89681	Avian coronavirus	China	Gallus gallus	2009-11-10
N	APY26834	Avian coronavirus	China	Gallus gallus	2009-12-01
N	AHX26064	Avian coronavirus	China	Gallus gallus	2009-12-05
N	QBM00061	Porcine epidemic diarrhea virus	China	Sus scrofa	2010-02-01
N	AFR58686	Severe acute respiratory syndrome-related coronavirus	USA		2010-02-05
N	AFR58700	Severe acute respiratory syndrome-related coronavirus	USA		2010-02-05
N	AFR58728	Severe acute respiratory syndrome-related coronavirus	USA		2010-02-05
N	AFR58742	Severe acute respiratory syndrome-related coronavirus	USA		2010-02-05
N	AFR58672	Severe acute respiratory syndrome-related coronavirus	USA		2010-02-10
N	AFR58714	Severe acute respiratory syndrome-related coronavirus	USA		2010-02-10
N	AEK25521	Alphacoronavirus 1	Netherlands	Felis catus	2010-03-12
N	APY26825	Avian coronavirus	China	Gallus gallus	2010-04-01
N	APZ73787	Avian coronavirus	China	Gallus gallus	2010-05-01
N	APD51507	Human coronavirus 229E	Kenya	Hipposideros vittatus	2010-06-01
N	APD51475	NL63-related bat coronavirus strain BtKYNL63-9b	Kenya	Triaenops afer	2010-06-21
N	APD51483	NL63-related bat coronavirus strain BtKYNL63-9b	Kenya	Triaenops afer	2010-06-21
N	YP_009328935	NL63-related bat coronavirus strain BtKYNL63-9b	Kenya	Triaenops afer	2010-06-21
N	AEK25511	Alphacoronavirus 1	Netherlands	Felis catus	2010-07-14
N	AFU92122	Bat coronavirus HKU10	Hong Kong	Chiroptera	2010-08-01
N	AFU92131	Bat coronavirus HKU10	Hong Kong	Chiroptera	2010-08-01
N	AGT52080	Alphacoronavirus 1	Netherlands	Felis catus	2010-08-17
N	AFX59327	Avian coronavirus	China	Gallus gallus	2010-10-01
N	AGT20793	Severe acute respiratory syndrome-related coronavirus	USA		2010-10-01
N	AGT20823	Severe acute respiratory syndrome-related coronavirus	USA		2010-10-01
N	AGT20838	Severe acute respiratory syndrome-related coronavirus	USA		2010-10-01
N	AGT20853	Severe acute respiratory syndrome-related coronavirus	USA		2010-10-01
N	AGT20868	Severe acute respiratory syndrome-related coronavirus	USA		2010-10-01
N	AGT20943	Severe acute respiratory syndrome-related coronavirus	USA		2010-10-01
N	AGT20958	Severe acute respiratory syndrome-related coronavirus	USA		2010-10-01
N	AGT20973	Severe acute respiratory syndrome-related coronavirus	USA		2010-10-01
N	AGT20988	Severe acute respiratory syndrome-related coronavirus	USA		2010-10-01
N	AGT21003	Severe acute respiratory syndrome-related coronavirus	USA		2010-10-01
N	AGT21018	Severe acute respiratory syndrome-related coronavirus	USA		2010-10-01
N	AGT21033	Severe acute respiratory syndrome-related coronavirus	USA		2010-10-01
N	AGT21048	Severe acute respiratory syndrome-related coronavirus	USA		2010-10-01
N	AGT21078	Severe acute respiratory syndrome-related coronavirus	USA		2010-10-01
N	AGT21168	Severe acute respiratory syndrome-related coronavirus	USA		2010-10-01
N	AGT21198	Severe acute respiratory syndrome-related coronavirus	USA		2010-10-01
N	AGT21213	Severe acute respiratory syndrome-related coronavirus	USA		2010-10-01
N	AGT21228	Severe acute respiratory syndrome-related coronavirus	USA		2010-10-01
N	AGT21288	Severe acute respiratory syndrome-related coronavirus	USA		2010-10-01
N	AGT21303	Severe acute respiratory syndrome-related coronavirus	USA		2010-10-01
N	ASL24654	Bat coronavirus CDPHE15	Canada	Myotis lucifugus	2010-11-01
N	APV46121	Avian coronavirus	China	Gallus gallus	2010-11-01
N	APZ73670	Avian coronavirus	China	Gallus gallus	2010-11-01
N	AYL64492	Porcine epidemic diarrhea virus	China	Sus scrofa	2011-01-18
N	AFV09314	Porcine epidemic diarrhea virus	China	Sus scrofa	2011-02-01
N	AFP23843	Porcine epidemic diarrhea virus	China	Sus scrofa	2011-02-01
N	QCQ19966	Porcine epidemic diarrhea virus	China	Sus scrofa	2011-02-10
N	AFR54326	Porcine epidemic diarrhea virus	China	Sus scrofa	2011-02-10
N	QCQ19930	Porcine epidemic diarrhea virus	China	Sus scrofa	2011-02-10
N	QCQ19936	Porcine epidemic diarrhea virus	China	Sus scrofa	2011-02-10
N	QCQ19960	Porcine epidemic diarrhea virus	China	Sus scrofa	2011-02-10
N	QCQ19954	Porcine epidemic diarrhea virus	China	Sus scrofa	2011-02-10
N	QCQ19948	Porcine epidemic diarrhea virus	China	Sus scrofa	2011-02-10
N	AHX26073	Avian coronavirus	China	Gallus gallus	2011-03-10
N	QCQ19984	Porcine epidemic diarrhea virus	China	Sus scrofa	2011-03-10
N	AHB74007	Avian coronavirus	China	Gallus gallus	2011-04-01
N	AJP67420	Porcine epidemic diarrhea virus	China	Sus scrofa	2011-04-01
N	AFV46344	Porcine epidemic diarrhea virus	China	Sus scrofa	2011-04-10
N	AGZ48806	Severe acute respiratory syndrome-related coronavirus	China	Rhinolophus sinicus	2011-04-17
N	AFC98504	Porcine epidemic diarrhea virus	China	Sus scrofa	2011-04-25
N	QCQ20026	Porcine epidemic diarrhea virus	China	Sus scrofa	2011-04-26
N	AFQ37598	Porcine epidemic diarrhea virus	China	Sus scrofa	2011-05-01
N	AGA94620	Porcine epidemic diarrhea virus	China	Sus scrofa	2011-05-01
N	QGZ28404	Porcine epidemic diarrhea virus	China	Sus scrofa	2011-05-01
N	AFB77234	Porcine epidemic diarrhea virus	China	Sus scrofa	2011-05-03
N	AHX26118	Avian coronavirus	China	Gallus gallus	2011-05-05
N	QAR17949	Porcine epidemic diarrhea virus	China		2011-05-22
N	QCQ19942	Porcine epidemic diarrhea virus	China	Sus scrofa	2011-05-25
N	QCQ20014	Porcine epidemic diarrhea virus	China	Sus scrofa	2011-05-25
N	AHX25911	Avian coronavirus	China	Gallus gallus	2011-05-26
N	AHX26127	Avian coronavirus	China	Gallus gallus	2011-05-29
N	AJP67402	Porcine epidemic diarrhea virus	China	Sus scrofa	2011-06-01
N	AKC34133	Avian coronavirus	South Africa	Gallus gallus	2011-06-01
N	AHX26136	Avian coronavirus	China	Gallus gallus	2011-07-26
N	AHX25920	Avian coronavirus	China	Gallus gallus	2011-08-25
N	AGC74165	Severe acute respiratory syndrome-related coronavirus	China	Rhinolophus pusillus	2011-09-01
N	AHX25893	Avian coronavirus	China	Gallus gallus	2011-09-17
N	QCQ20020	Porcine epidemic diarrhea virus	China	Sus scrofa	2011-09-25
N	AQW43023	Coronavirus AcCoV-JC34	China	Apodemus chevrieri	2011-10-01
N	AHN54764	Avian coronavirus	Ukraine	Gallus gallus	2011-10-01
N	YP_009380521	Coronavirus AcCoV-JC34	China	Apodemus chevrieri	2011-10-01
N	AGJ98437	Avian coronavirus	China	Gallus gallus	2011-10-10
N	AHG97559	Porcine epidemic diarrhea virus	China		2011-10-20
N	AHX26082	Avian coronavirus	China	Gallus gallus	2011-10-22
N	APD70934	Porcine epidemic diarrhea virus	China	Sus scrofa	2011-11-01
N	APV46112	Avian coronavirus	China	Gallus gallus	2011-11-01
N	AQD20737	Avian coronavirus	China	Gallus gallus	2011-11-01
N	AFQ94222	Avian coronavirus	China	Gallus gallus	2011-11-03
N	AHX25929	Avian coronavirus	China	Gallus gallus	2011-11-18
N	AGZ89672	Avian coronavirus	China	Gallus gallus	2011-11-22
N	QCQ20032	Porcine epidemic diarrhea virus	China	Sus scrofa	2011-11-27
N	AFW98998	Porcine epidemic diarrhea virus	China	Sus scrofa	2011-12-01
N	APV46139	Avian coronavirus	China	Gallus gallus	2011-12-01
N	AHX25947	Avian coronavirus	China	Gallus gallus	2011-12-18
N	AHX26145	Avian coronavirus	China	Gallus gallus	2011-12-19
N	AHX25938	Avian coronavirus	China	Gallus gallus	2011-12-21
N	AHX26154	Avian coronavirus	China	Gallus gallus	2011-12-23
N	AHX26172	Avian coronavirus	China	Gallus gallus	2011-12-27
N	AJP67414	Porcine epidemic diarrhea virus	China	Sus scrofa	2012-01-01
N	QCE31533	Avian coronavirus	United Kingdom	Gallus gallus	2012-02-01
N	AFX98013	Porcine epidemic diarrhea virus	China	Sus scrofa	2012-02-01
N	AIJ01335	Porcine epidemic diarrhea virus	China	Sus scrofa	2012-02-01
N	AIJ01341	Porcine epidemic diarrhea virus	China		2012-02-01
N	QCQ19798	Porcine epidemic diarrhea virus	China	Sus scrofa	2012-02-08
N	AFP81695	Porcine epidemic diarrhea virus	China	Sus scrofa	2012-02-11
N	AVK78141	Porcine epidemic diarrhea virus	China	Sus scrofa	2012-02-21
N	AGR51642	Porcine epidemic diarrhea virus	China		2012-03-01
N	AJP67396	Porcine epidemic diarrhea virus	China	Sus scrofa	2012-03-01
N	AJP67426	Porcine epidemic diarrhea virus	China	Sus scrofa	2012-03-01
N	AIE15935	Porcine epidemic diarrhea virus	China	Sus scrofa	2012-03-04
N	AGG55737	Porcine epidemic diarrhea virus	China	Sus scrofa	2012-03-15
N	AGZ48818	Severe acute respiratory syndrome-related coronavirus	China	Rhinolophus sinicus	2012-03-19
N	APV46184	Avian coronavirus	China	Gallus gallus	2012-04-01
N	APW85794	Avian coronavirus	China	Gallus gallus	2012-04-01
N	AHX25956	Avian coronavirus	China	Gallus gallus	2012-04-03
N	AQD20746	Avian coronavirus	China	Gallus gallus	2012-05-01
N	AGM75126	Alphacoronavirus 1	China	Sus scrofa	2012-05-05
N	AJA91196	China Rattus coronavirus HKU24	China	Rattus norvegicus	2012-05-17
N	AJA91207	China Rattus coronavirus HKU24	China	Rattus norvegicus	2012-05-17
N	AJA91217	China Rattus coronavirus HKU24	China	Rattus norvegicus	2012-05-17
N	YP_009113025	China Rattus coronavirus HKU24	China	Rattus norvegicus	2012-05-17
N	QBP43256	Bat coronavirus	China		2012-05-19
N	AHX25902	Avian coronavirus	China	Gallus gallus	2012-05-23
N	APY23605	Avian coronavirus	China	Gallus gallus	2012-06-01
N	AHB73989	Avian coronavirus	China	Gallus gallus	2012-06-01
N	QCQ19876	Porcine epidemic diarrhea virus	China	Sus scrofa	2012-06-04
N	QCQ19822	Porcine epidemic diarrhea virus	China	Sus scrofa	2012-06-04
N	QCQ19864	Porcine epidemic diarrhea virus	China	Sus scrofa	2012-06-15
N	QCQ19804	Porcine epidemic diarrhea virus	China	Sus scrofa	2012-06-22
N	AXE71621	Alphacoronavirus 1	Germany	Felis catus	2012-07-01
N	APU51865	Avian coronavirus	China	Gallus gallus	2012-07-01
N	AFY11698	Avian coronavirus	China	Gallus gallus	2012-07-12
N	QCQ19972	Porcine epidemic diarrhea virus	China	Sus scrofa	2012-07-15
N	AFY11707	Avian coronavirus	China	Gallus gallus	2012-07-20
N	AHX25965	Avian coronavirus	China	Gallus gallus	2012-07-21
N	AQD20755	Avian coronavirus	China	Gallus gallus	2012-08-01
N	AIG54295	Avian coronavirus	Australia	Gallus gallus	2012-08-06
N	AGK89914	Porcine epidemic diarrhea virus	China	Sus scrofa	2012-08-20
N	AGZ48831	Severe acute respiratory syndrome-related coronavirus	China	Rhinolophus sinicus	2012-09-01
N	APV46157	Avian coronavirus	China	Gallus gallus	2012-09-01
N	APU51847	Avian coronavirus	China	Gallus gallus	2012-09-01
N	QBP43268	Bat coronavirus	China		2012-09-16
N	QCQ19828	Porcine epidemic diarrhea virus	China	Sus scrofa	2012-09-17
N	ATO98132	Severe acute respiratory syndrome-related coronavirus	China	Rhinolophus sinicus	2012-09-18
N	ATO98145	Severe acute respiratory syndrome-related coronavirus	China	Rhinolophus ferrumequinum	2012-09-18
N	ATO98120	Severe acute respiratory syndrome-related coronavirus	China	Rhinolophus sinicus	2012-09-18
N	QCQ19834	Porcine epidemic diarrhea virus	China	Sus scrofa	2012-09-23
N	QCQ20008	Porcine epidemic diarrhea virus	China	Sus scrofa	2012-10-20
N	AHX26109	Avian coronavirus	China	Gallus gallus	2012-10-23
N	AHX25974	Avian coronavirus	China	Gallus gallus	2012-10-24
N	AGT17716	Murine coronavirus	USA	Mus musculus	2012-10-25
N	AGT17727	Murine coronavirus	USA	Mus musculus	2012-10-25
N	AGT17738	Murine coronavirus	USA	Mus musculus	2012-10-25
N	AGT17749	Murine coronavirus	USA	Mus musculus	2012-10-25
N	AHX25983	Avian coronavirus	China	Gallus gallus	2012-10-26
N	AWV57054	Porcine epidemic diarrhea virus	China	Sus scrofa	2012-11-05
N	AKE53205	Porcine epidemic diarrhea virus	China	Sus scrofa	2012-11-10
N	ASV64375	Alphacoronavirus 1	USA		2012-11-29
N	ANA96039	Bat coronavirus	China	Myotis daubentonii	2012-12-01
N	QCQ19858	Porcine epidemic diarrhea virus	China	Sus scrofa	2012-12-13
N	QCQ19810	Porcine epidemic diarrhea virus	China	Sus scrofa	2012-12-13
N	QDQ69173	Avian coronavirus	Poland	Gallus gallus	2012-12-14
N	AHN49809	Avian coronavirus	China	Gallus gallus	2012-12-20
N	AHX26163	Avian coronavirus	China	Gallus gallus	2012-12-28
N	AJO26973	Alphacoronavirus 1	United Kingdom	Felis catus	2013-01-01
N	AJO26983	Alphacoronavirus 1	United Kingdom	Felis catus	2013-01-01
N	AJO26993	Alphacoronavirus 1	United Kingdom	Felis catus	2013-01-01
N	AJO27003	Alphacoronavirus 1	United Kingdom	Felis catus	2013-01-01
N	AJO27013	Alphacoronavirus 1	United Kingdom	Felis catus	2013-01-01
N	AJO27023	Alphacoronavirus 1	United Kingdom	Felis catus	2013-01-01
N	AWR92745	Avian coronavirus	China	Gallus gallus	2013-01-01
N	APY26816	Avian coronavirus	China	Gallus gallus	2013-01-01
N	ASV64384	Alphacoronavirus 1	USA		2013-01-04
N	QCQ19816	Porcine epidemic diarrhea virus	China	Sus scrofa	2013-01-15
N	AWV57048	Porcine epidemic diarrhea virus	China	Sus scrofa	2013-01-16
N	ALL27302	Porcine epidemic diarrhea virus	China	Sus scrofa	2013-02-01
N	APV46166	Avian coronavirus	China	Gallus gallus	2013-02-01
N	AHW40030	Porcine epidemic diarrhea virus	China	Sus scrofa	2013-02-05
N	QCQ19996	Porcine epidemic diarrhea virus	China	Sus scrofa	2013-02-06
N	ARJ34226	Bat coronavirus	Uganda	Pipistrellus	2013-02-20
N	YP_009361857	Bat coronavirus	Uganda	Pipistrellus	2013-02-20
N	ASV64393	Alphacoronavirus 1	USA		2013-02-28
N	ASV64402	Alphacoronavirus 1	USA		2013-03-01
N	AHF20045	Porcine epidemic diarrhea virus	China	Sus scrofa	2013-03-01
N	AHM88217	Porcine epidemic diarrhea virus	China	Sus scrofa	2013-03-01
N	AJP67432	Porcine epidemic diarrhea virus	China	Sus scrofa	2013-03-01
N	APW85785	Avian coronavirus	China	Gallus gallus	2013-03-01
N	AKA60054	Alphacoronavirus 1	China	Sus scrofa	2013-03-07
N	AVU05452	Porcine epidemic diarrhea virus	Mexico	Sus scrofa	2013-03-13
N	AJD07366	Porcine epidemic diarrhea virus	China	Sus scrofa	2013-04-01
N	AHN64774	Betacoronavirus 1	United Arab Emirates	Camelus bactrianus	2013-04-03
N	ATO98157	Severe acute respiratory syndrome-related coronavirus	China	Rhinolophus sinicus	2013-04-17
N	ATO98193	Severe acute respiratory syndrome-related coronavirus	China	Rhinolophus sinicus	2013-04-17
N	ATO98169	Severe acute respiratory syndrome-related coronavirus	China	Rhinolophus sinicus	2013-04-17
N	ATO98181	Severe acute respiratory syndrome-related coronavirus	China	Rhinolophus sinicus	2013-04-17
N	QBP43279	Bat coronavirus	China		2013-04-17
N	AHC03502	Porcine epidemic diarrhea virus	USA	Sus scrofa	2013-04-29
N	AIL94216	Bat Hp-betacoronavirus Zhejiang2013	China	Hipposideros pratti	2013-04-29
N	YP_009072440	Bat Hp-betacoronavirus Zhejiang2013	China	Hipposideros pratti	2013-04-29
N	AST13215	Porcine epidemic diarrhea virus	China	Sus scrofa	2013-05-01
N	APW85776	Avian coronavirus	China	Gallus gallus	2013-05-01
N	AHC03508	Porcine epidemic diarrhea virus	USA	Sus scrofa	2013-05-07
N	AGO58924	Porcine epidemic diarrhea virus	USA	Sus scrofa	2013-05-10
N	AKV60429	Avian coronavirus	Italy	Gallus gallus	2013-05-13
N	AHN64783	Betacoronavirus 1	United Arab Emirates	Camelus bactrianus	2013-05-15
N	AIK69675	Porcine epidemic diarrhea virus	USA	Sus scrofa	2013-05-15
N	AHA38118	Porcine epidemic diarrhea virus	USA	Sus scrofa	2013-05-16
N	AHA38160	Porcine epidemic diarrhea virus	USA	Sus scrofa	2013-05-16
N	AKP80610	Porcine epidemic diarrhea virus	USA	Sus scrofa	2013-05-16
N	AHZ94881	Porcine epidemic diarrhea virus	USA	Sus scrofa	2013-05-20
N	AHZ94887	Porcine epidemic diarrhea virus	USA	Sus scrofa	2013-05-20
N	AHN64792	Betacoronavirus 1	United Arab Emirates	Camelus bactrianus	2013-05-21
N	AKZ19076	Severe acute respiratory syndrome-related coronavirus	China	Rhinolophus ferrumequinum	2013-05-23
N	AKZ19087	Severe acute respiratory syndrome-related coronavirus	China	Rhinolophus ferrumequinum	2013-05-23
N	AHX26001	Avian coronavirus	China	Gallus gallus	2013-05-24
N	AHX25992	Avian coronavirus	China	Gallus gallus	2013-05-25
N	ANY27037	Porcine epidemic diarrhea virus	USA	Sus scrofa	2013-05-29
N	AGS12449	Porcine epidemic diarrhea virus	USA	Sus scrofa	2013-05-29
N	AKP80617	Porcine epidemic diarrhea virus	USA	Sus scrofa	2013-05-29
N	ARM65485	Porcine epidemic diarrhea virus			2013-06-01
N	APX42107	Porcine epidemic diarrhea virus	USA	Sus scrofa	2013-06-01
N	AIN52094	Porcine epidemic diarrhea virus	USA	Sus scrofa	2013-06-01
N	AIN52088	Porcine epidemic diarrhea virus	USA	Sus scrofa	2013-06-01
N	AKR05178	Porcine epidemic diarrhea virus	USA	Sus scrofa	2013-06-01
N	APV46175	Avian coronavirus	China	Gallus gallus	2013-06-01
N	QBP43290	Bat coronavirus	China		2013-06-01
N	AHA38139	Porcine epidemic diarrhea virus	USA	Sus scrofa	2013-06-06
N	AID56667	Porcine epidemic diarrhea virus	USA	Sus scrofa	2013-06-08
N	AIA61014	Porcine epidemic diarrhea virus	USA	Sus scrofa	2013-06-14
N	AHX26010	Avian coronavirus	China	Gallus gallus	2013-06-18
N	AGY31022	Porcine epidemic diarrhea virus	USA	Sus scrofa	2013-06-19
N	AID57081	Porcine epidemic diarrhea virus	USA	Sus scrofa	2013-06-26
N	APZ73834	Avian coronavirus	China	Gallus gallus	2013-07-01
N	AKO90055	Porcine epidemic diarrhea virus	China	Sus scrofa	2013-07-01
N	QCQ19978	Porcine epidemic diarrhea virus	China	Sus scrofa	2013-07-02
N	AID56673	Porcine epidemic diarrhea virus	USA	Sus scrofa	2013-07-14
N	AID56679	Porcine epidemic diarrhea virus	USA	Sus scrofa	2013-07-15
N	AVV62526	Middle East respiratory syndrome-related coronavirus	China		2013-07-17
N	ALK02457	SARS-like coronavirus WIV16	China	Rhinolophus sinicus	2013-07-21
N	ATO98205	Severe acute respiratory syndrome-related coronavirus	China	Rhinolophus sinicus	2013-07-21
N	AID56685	Porcine epidemic diarrhea virus	USA	Sus scrofa	2013-07-22
N	AID56691	Porcine epidemic diarrhea virus	USA	Sus scrofa	2013-07-22
N	AID56697	Porcine epidemic diarrhea virus	USA	Sus scrofa	2013-07-24
N	AVU05410	Porcine epidemic diarrhea virus	Mexico	Sus scrofa	2013-07-24
N	AVU05466	Porcine epidemic diarrhea virus	Mexico	Sus scrofa	2013-07-24
N	ANA96027	Bat coronavirus	China	Rhinolophus ferrumequinum	2013-08-01
N	AHB79523	Avian coronavirus	China		2013-08-01
N	ALM09359	Porcine epidemic diarrhea virus	China	Sus scrofa	2013-08-02
N	AID56703	Porcine epidemic diarrhea virus	USA	Sus scrofa	2013-08-21
N	AID56709	Porcine epidemic diarrhea virus	USA	Sus scrofa	2013-08-26
N	AID56715	Porcine epidemic diarrhea virus	USA	Sus scrofa	2013-09-01
N	AID56721	Porcine epidemic diarrhea virus	USA	Sus scrofa	2013-09-07
N	AKP80589	Porcine epidemic diarrhea virus	USA	Sus scrofa	2013-09-12
N	ASL68941	Hypsugo bat coronavirus HKU25	China	Hypsugo pulveratus	2013-09-14
N	AHG97485	Porcine epidemic diarrhea virus	China		2013-09-20
N	AID56727	Porcine epidemic diarrhea virus	USA	Sus scrofa	2013-09-28
N	AVU05424	Porcine epidemic diarrhea virus	Mexico	Sus scrofa	2013-09-30
N	AVU05417	Porcine epidemic diarrhea virus	Mexico	Sus scrofa	2013-09-30
N	ARB66171	Avian coronavirus	China	Gallus gallus	2013-10-01
N	APY23614	Avian coronavirus	China	Gallus gallus	2013-10-01
N	ALM09364	Porcine epidemic diarrhea virus	China	Sus scrofa	2013-10-05
N	AID56733	Porcine epidemic diarrhea virus	USA	Sus scrofa	2013-10-05
N	AML40818	Coronavirus HKU15	USA	Sus scrofa	2013-10-14
N	AID56739	Porcine epidemic diarrhea virus	USA	Sus scrofa	2013-10-14
N	AID56745	Porcine epidemic diarrhea virus	USA	Sus scrofa	2013-10-20
N	AID56751	Porcine epidemic diarrhea virus	USA	Sus scrofa	2013-10-20
N	AID56757	Porcine epidemic diarrhea virus	USA	Sus scrofa	2013-10-23
N	AID56763	Porcine epidemic diarrhea virus	USA	Sus scrofa	2013-10-23
N	AHY22525	Middle East respiratory syndrome-related coronavirus	Saudi Arabia	Camelus dromedarius	2013-11-01
N	AHY22535	Middle East respiratory syndrome-related coronavirus	Saudi Arabia	Camelus dromedarius	2013-11-01
N	AHY22545	Middle East respiratory syndrome-related coronavirus	Saudi Arabia	Camelus dromedarius	2013-11-01
N	AHY22555	Middle East respiratory syndrome-related coronavirus	Saudi Arabia	Camelus dromedarius	2013-11-01
N	AHY22565	Middle East respiratory syndrome-related coronavirus	Saudi Arabia	Camelus dromedarius	2013-11-01
N	AIN52100	Porcine epidemic diarrhea virus	USA	Sus scrofa	2013-11-01
N	AIN52106	Porcine epidemic diarrhea virus	USA	Sus scrofa	2013-11-01
N	AID56769	Porcine epidemic diarrhea virus	USA	Sus scrofa	2013-11-02
N	AID56775	Porcine epidemic diarrhea virus	USA	Sus scrofa	2013-11-03
N	AID57105	Porcine epidemic diarrhea virus	Mexico	Sus scrofa	2013-11-03
N	AID56781	Porcine epidemic diarrhea virus	USA	Sus scrofa	2013-11-04
N	AID56787	Porcine epidemic diarrhea virus	USA	Sus scrofa	2013-11-05
N	ALM09370	Porcine epidemic diarrhea virus	China	Sus scrofa	2013-11-08
N	AHE78097	Middle East respiratory syndrome-related coronavirus	Saudi Arabia	Camelus	2013-11-08
N	AID56793	Porcine epidemic diarrhea virus	USA	Sus scrofa	2013-11-11
N	AID56799	Porcine epidemic diarrhea virus	USA	Sus scrofa	2013-11-12
N	AID57039	Porcine epidemic diarrhea virus	USA	Sus scrofa	2013-11-12
N	ANY27031	Porcine epidemic diarrhea virus	China	Sus scrofa	2013-11-14
N	AOC38021	Porcine epidemic diarrhea virus	China	Sus scrofa	2013-11-14
N	AHX26019	Avian coronavirus	China	Gallus gallus	2013-11-18
N	AID56805	Porcine epidemic diarrhea virus	USA	Sus scrofa	2013-11-18
N	AID57087	Porcine epidemic diarrhea virus	USA	Sus scrofa	2013-11-18
N	AID56811	Porcine epidemic diarrhea virus	USA	Sus scrofa	2013-11-19
N	AID56817	Porcine epidemic diarrhea virus	USA	Sus scrofa	2013-11-19
N	AID56823	Porcine epidemic diarrhea virus	USA	Sus scrofa	2013-11-20
N	AHX26028	Avian coronavirus	China	Gallus gallus	2013-11-21
N	AID56829	Porcine epidemic diarrhea virus	USA	Sus scrofa	2013-11-23
N	AID56835	Porcine epidemic diarrhea virus	USA	Sus scrofa	2013-11-23
N	AID56841	Porcine epidemic diarrhea virus	USA	Sus scrofa	2013-11-24
N	AID56847	Porcine epidemic diarrhea virus	USA	Sus scrofa	2013-11-24
N	AID56853	Porcine epidemic diarrhea virus	USA	Sus scrofa	2013-11-24
N	AID56865	Porcine epidemic diarrhea virus	USA	Sus scrofa	2013-11-25
N	AID57093	Porcine epidemic diarrhea virus	USA	Sus scrofa	2013-11-25
N	AHX26037	Avian coronavirus	China	Gallus gallus	2013-11-26
N	AHX26046	Avian coronavirus	China	Gallus gallus	2013-11-26
N	AID56871	Porcine epidemic diarrhea virus	USA	Sus scrofa	2013-11-27
N	AID56877	Porcine epidemic diarrhea virus	USA	Sus scrofa	2013-11-27
N	AID56859	Porcine epidemic diarrhea virus	USA	Sus scrofa	2013-11-28
N	AID56889	Porcine epidemic diarrhea virus	USA	Sus scrofa	2013-11-28
N	AID56895	Porcine epidemic diarrhea virus	USA	Sus scrofa	2013-11-28
N	AHX00731	Middle East respiratory syndrome-related coronavirus	Saudi Arabia	Camelus dromedarius	2013-11-30
N	AID56883	Porcine epidemic diarrhea virus	USA	Sus scrofa	2013-11-30
N	AID56901	Porcine epidemic diarrhea virus	USA	Sus scrofa	2013-11-30
N	AIN52112	Porcine epidemic diarrhea virus	USA	Sus scrofa	2013-12-01
N	AIN52118	Porcine epidemic diarrhea virus	USA	Sus scrofa	2013-12-01
N	AIN52124	Porcine epidemic diarrhea virus	USA	Sus scrofa	2013-12-01
N	AIN52130	Porcine epidemic diarrhea virus	USA	Sus scrofa	2013-12-01
N	AIN52136	Porcine epidemic diarrhea virus	USA	Sus scrofa	2013-12-01
N	AKR05184	Porcine epidemic diarrhea virus	USA	Sus scrofa	2013-12-01
N	AID66720	Porcine epidemic diarrhea virus	South Korea	Sus scrofa	2013-12-01
N	AID56913	Porcine epidemic diarrhea virus	USA	Sus scrofa	2013-12-02
N	AID56919	Porcine epidemic diarrhea virus	USA	Sus scrofa	2013-12-02
N	AID56907	Porcine epidemic diarrhea virus	USA	Sus scrofa	2013-12-03
N	AID57099	Porcine epidemic diarrhea virus	USA	Sus scrofa	2013-12-03
N	AID56925	Porcine epidemic diarrhea virus	USA	Sus scrofa	2013-12-04
N	AID56937	Porcine epidemic diarrhea virus	USA	Sus scrofa	2013-12-04
N	AID56943	Porcine epidemic diarrhea virus	USA	Sus scrofa	2013-12-04
N	AID56949	Porcine epidemic diarrhea virus	USA	Sus scrofa	2013-12-04
N	AID56931	Porcine epidemic diarrhea virus	USA	Sus scrofa	2013-12-07
N	QCQ20002	Porcine epidemic diarrhea virus	China	Sus scrofa	2013-12-07
N	AID56955	Porcine epidemic diarrhea virus	USA	Sus scrofa	2013-12-08
N	AKP80596	Porcine epidemic diarrhea virus	USA	Sus scrofa	2013-12-09
N	AKP80603	Porcine epidemic diarrhea virus	USA	Sus scrofa	2013-12-10
N	AID56973	Porcine epidemic diarrhea virus	USA	Sus scrofa	2013-12-10
N	AID56979	Porcine epidemic diarrhea virus	USA	Sus scrofa	2013-12-10
N	AID56961	Porcine epidemic diarrhea virus	USA	Sus scrofa	2013-12-11
N	AID56967	Porcine epidemic diarrhea virus	USA	Sus scrofa	2013-12-11
N	AID56985	Porcine epidemic diarrhea virus	USA	Sus scrofa	2013-12-11
N	AID56991	Porcine epidemic diarrhea virus	USA	Sus scrofa	2013-12-11
N	AID56997	Porcine epidemic diarrhea virus	USA	Sus scrofa	2013-12-11
N	AID57003	Porcine epidemic diarrhea virus	USA	Sus scrofa	2013-12-14
N	AID57009	Porcine epidemic diarrhea virus	USA	Sus scrofa	2013-12-15
N	AID57015	Porcine epidemic diarrhea virus	USA	Sus scrofa	2013-12-15
N	AID57021	Porcine epidemic diarrhea virus	USA	Sus scrofa	2013-12-15
N	AID57051	Porcine epidemic diarrhea virus	USA	Sus scrofa	2013-12-15
N	AHX26091	Avian coronavirus	China	Gallus gallus	2013-12-16
N	AID57027	Porcine epidemic diarrhea virus	USA	Sus scrofa	2013-12-29
N	AID57033	Porcine epidemic diarrhea virus	USA	Sus scrofa	2013-12-29
N	AHX00711	Middle East respiratory syndrome-related coronavirus	Saudi Arabia	Camelus dromedarius	2013-12-30
N	AHX00721	Middle East respiratory syndrome-related coronavirus	Saudi Arabia	Camelus dromedarius	2013-12-30
N	AMD11124	Porcine epidemic diarrhea virus	USA	Sus scrofa	2013-12-31
N	AMD11118	Porcine epidemic diarrhea virus	USA	Sus scrofa	2013-12-31
N	AKP80624	Porcine epidemic diarrhea virus	USA	Sus scrofa	2013-12-31
N	AMR60480	Avian coronavirus	China	Gallus gallus	2014-01-01
N	AJP67438	Porcine epidemic diarrhea virus	China	Sus scrofa	2014-01-01
N	AJP67444	Porcine epidemic diarrhea virus	China	Sus scrofa	2014-01-01
N	AID57045	Porcine epidemic diarrhea virus	USA	Sus scrofa	2014-01-01
N	AMS37100	Porcine epidemic diarrhea virus	China	Sus scrofa	2014-01-01
N	AKJ21725	Porcine epidemic diarrhea virus	USA	Sus scrofa	2014-01-03
N	ARJ54146	Porcine epidemic diarrhea virus	China	Sus scrofa	2014-01-04
N	AHL45007	Coronavirus HKU15	USA	Sus scrofa	2014-01-04
N	AMS37110	Porcine epidemic diarrhea virus	China	Sus scrofa	2014-01-04
N	AKJ21779	Porcine epidemic diarrhea virus	USA	Sus scrofa	2014-01-07
N	AIB07785	Coronavirus HKU15	USA	Sus scrofa	2014-01-08
N	AIB07793	Coronavirus HKU15	USA	Sus scrofa	2014-01-08
N	AKJ21797	Porcine epidemic diarrhea virus	USA	Sus scrofa	2014-01-09
N	QCQ19852	Porcine epidemic diarrhea virus	China	Sus scrofa	2014-01-09
N	AIB07800	Coronavirus HKU15	USA	Sus scrofa	2014-01-11
N	AKJ21701	Porcine epidemic diarrhea virus	USA	Sus scrofa	2014-01-14
N	AKJ21821	Porcine epidemic diarrhea virus	USA	Sus scrofa	2014-01-14
N	AHL38184	Porcine epidemic diarrhea virus	USA	Sus scrofa	2014-01-15
N	ATN37896	Murine coronavirus	USA	Mus musculus	2014-01-16
N	ATN37888	Murine coronavirus	USA	Mus musculus	2014-01-16
N	ASV64411	Alphacoronavirus 1	USA		2014-01-17
N	AKJ21827	Porcine epidemic diarrhea virus	USA	Sus scrofa	2014-01-17
N	AKP80631	Porcine epidemic diarrhea virus	USA	Sus scrofa	2014-01-20
N	AIK28708	Porcine epidemic diarrhea virus	USA		2014-01-22
N	AKJ22175	Porcine epidemic diarrhea virus	USA	Sus scrofa	2014-01-22
N	AID57057	Porcine epidemic diarrhea virus	Mexico	Sus scrofa	2014-01-22
N	AHN60052	Porcine epidemic diarrhea virus	USA	Sus scrofa	2014-01-23
N	AIB07807	Coronavirus HKU15	USA	Sus scrofa	2014-01-26
N	AID57063	Porcine epidemic diarrhea virus	USA	Sus scrofa	2014-01-27
N	AKJ21893	Porcine epidemic diarrhea virus	USA	Sus scrofa	2014-01-29
N	AID57069	Porcine epidemic diarrhea virus	USA	Sus scrofa	2014-01-29
N	ASV64420	Alphacoronavirus 1	USA		2014-01-31
N	AHN16220	Coronavirus HKU15	USA	Sus scrofa	2014-01-31
N	AHX58670	Porcine epidemic diarrhea virus	South Korea	Sus scrofa	2014-02-01
N	AHX58676	Porcine epidemic diarrhea virus	South Korea	Sus scrofa	2014-02-01
N	AHX58682	Porcine epidemic diarrhea virus	South Korea	Sus scrofa	2014-02-01
N	AID57075	Porcine epidemic diarrhea virus	USA	Sus scrofa	2014-02-02
N	AKJ21803	Porcine epidemic diarrhea virus	USA	Sus scrofa	2014-02-03
N	ASV64429	Alphacoronavirus 1	USA		2014-02-04
N	AIJ19445	Porcine epidemic diarrhea virus	Canada	Sus scrofa	2014-02-04
N	ASV64438	Alphacoronavirus 1	USA		2014-02-05
N	AML40867	Coronavirus HKU15	USA	Sus scrofa	2014-02-05
N	AML40874	Coronavirus HKU15	USA	Sus scrofa	2014-02-05
N	ALM09375	Porcine epidemic diarrhea virus	China	Sus scrofa	2014-02-05
N	AML40860	Coronavirus HKU15	USA	Sus scrofa	2014-02-11
N	AKJ21755	Porcine epidemic diarrhea virus	USA	Sus scrofa	2014-02-11
N	AKJ21941	Porcine epidemic diarrhea virus	USA	Sus scrofa	2014-02-12
N	AKJ21707	Porcine epidemic diarrhea virus	USA	Sus scrofa	2014-02-12
N	AIA60973	Coronavirus HKU15	USA	Sus scrofa	2014-02-12
N	AKJ21905	Porcine epidemic diarrhea virus	USA	Sus scrofa	2014-02-13
N	AHN16227	Coronavirus HKU15	USA	Sus scrofa	2014-02-13
N	AKJ21845	Porcine epidemic diarrhea virus	USA	Sus scrofa	2014-02-14
N	AHX71946	Middle East respiratory syndrome-related coronavirus	Qatar	Camelus dromedarius	2014-02-16
N	AKJ21977	Porcine epidemic diarrhea virus	USA	Sus scrofa	2014-02-17
N	AKJ21989	Porcine epidemic diarrhea virus	USA	Sus scrofa	2014-02-17
N	AKJ21995	Porcine epidemic diarrhea virus	USA	Sus scrofa	2014-02-17
N	AKJ22211	Porcine epidemic diarrhea virus	USA	Sus scrofa	2014-02-18
N	AKJ21731	Porcine epidemic diarrhea virus	USA	Sus scrofa	2014-02-18
N	AIA60994	Coronavirus HKU15	USA	Sus scrofa	2014-02-18
N	ASU45840	Middle East respiratory syndrome-related coronavirus	United Arab Emirates	Camelus	2014-02-18
N	ASU45873	Middle East respiratory syndrome-related coronavirus	United Arab Emirates	Camelus	2014-02-18
N	AKJ22025	Porcine epidemic diarrhea virus	USA	Sus scrofa	2014-02-20
N	AIA60980	Coronavirus HKU15	USA	Sus scrofa	2014-02-20
N	AHM88400	Coronavirus HKU15	USA	Sus scrofa	2014-02-20
N	AIA61001	Coronavirus HKU15	USA	Sus scrofa	2014-02-21
N	AYS76105	Avian coronavirus	Peru	Gallus gallus	2014-02-22
N	AML40839	Coronavirus HKU15	USA	Sus scrofa	2014-02-23
N	AML40846	Coronavirus HKU15	USA	Sus scrofa	2014-02-23
N	AKJ21833	Porcine epidemic diarrhea virus	USA	Sus scrofa	2014-02-25
N	AKJ21851	Porcine epidemic diarrhea virus	USA	Sus scrofa	2014-02-25
N	AKJ22073	Porcine epidemic diarrhea virus	USA	Sus scrofa	2014-02-26
N	AKJ22031	Porcine epidemic diarrhea virus	USA	Sus scrofa	2014-02-28
N	AVV64341	Betacoronavirus 1	China	Sus scrofa	2014-03-01
N	AJP67450	Porcine epidemic diarrhea virus	China	Sus scrofa	2014-03-01
N	AJP67456	Porcine epidemic diarrhea virus	China	Sus scrofa	2014-03-01
N	AIH06857	Coronavirus HKU15	USA	Sus scrofa	2014-03-01
N	AIS82613	Porcine epidemic diarrhea virus	China		2014-03-01
N	AIR95864	Porcine epidemic diarrhea virus	South Korea	Sus scrofa	2014-03-01
N	AKJ22037	Porcine epidemic diarrhea virus	USA	Sus scrofa	2014-03-03
N	ARD05999	Betacoronavirus 1	France	Bos taurus	2014-03-04
N	ALT66880	Middle East respiratory syndrome-related coronavirus	United Arab Emirates	Camelus dromedarius	2014-03-04
N	AKJ21911	Porcine epidemic diarrhea virus	USA	Sus scrofa	2014-03-04
N	AKJ21947	Porcine epidemic diarrhea virus	USA	Sus scrofa	2014-03-04
N	AKJ22079	Porcine epidemic diarrhea virus	USA	Sus scrofa	2014-03-04
N	AKJ21761	Porcine epidemic diarrhea virus	USA	Sus scrofa	2014-03-04
N	AKP99781	Porcine epidemic diarrhea virus	China	Sus scrofa	2014-03-05
N	AKJ22097	Porcine epidemic diarrhea virus	USA	Sus scrofa	2014-03-05
N	AML40776	Coronavirus HKU15	USA	Sus scrofa	2014-03-06
N	AKJ21917	Porcine epidemic diarrhea virus	USA	Sus scrofa	2014-03-07
N	AIA60987	Coronavirus HKU15	USA	Sus scrofa	2014-03-07
N	QGQ60228	Porcine epidemic diarrhea virus	Colombia	Sus scrofa	2014-03-07
N	AKJ22043	Porcine epidemic diarrhea virus	USA	Sus scrofa	2014-03-10
N	AKJ22049	Porcine epidemic diarrhea virus	USA	Sus scrofa	2014-03-11
N	AKJ22085	Porcine epidemic diarrhea virus	USA	Sus scrofa	2014-03-11
N	AKJ21767	Porcine epidemic diarrhea virus	USA	Sus scrofa	2014-03-11
N	ALT66870	Middle East respiratory syndrome-related coronavirus	United Arab Emirates	Camelus dromedarius	2014-03-12
N	AKJ21953	Porcine epidemic diarrhea virus	USA	Sus scrofa	2014-03-12
N	ASU45829	Middle East respiratory syndrome-related coronavirus	United Arab Emirates	Camelus	2014-03-12
N	QCQ19846	Porcine epidemic diarrhea virus	China	Sus scrofa	2014-03-12
N	AKJ21857	Porcine epidemic diarrhea virus	USA	Sus scrofa	2014-03-13
N	AKJ22103	Porcine epidemic diarrhea virus	USA	Sus scrofa	2014-03-13
N	AKJ21809	Porcine epidemic diarrhea virus	USA	Sus scrofa	2014-03-13
N	AKJ21863	Porcine epidemic diarrhea virus	USA	Sus scrofa	2014-03-14
N	AKJ21959	Porcine epidemic diarrhea virus	USA	Sus scrofa	2014-03-14
N	AML40783	Coronavirus HKU15	USA	Sus scrofa	2014-03-14
N	AML40895	Coronavirus HKU15	USA	Sus scrofa	2014-03-14
N	AKJ21815	Porcine epidemic diarrhea virus	USA	Sus scrofa	2014-03-14
N	AJW67223	Porcine epidemic diarrhea virus	China	Sus scrofa	2014-03-15
N	QGQ60240	Porcine epidemic diarrhea virus	Colombia	Sus scrofa	2014-03-16
N	AIP90486	Coronavirus HKU15	USA	Sus scrofa	2014-03-17
N	QGQ60234	Porcine epidemic diarrhea virus	Colombia	Sus scrofa	2014-03-17
N	AIA99518	Coronavirus HKU15	USA	Sus scrofa	2014-03-18
N	AKJ21923	Porcine epidemic diarrhea virus	USA	Sus scrofa	2014-03-19
N	QGQ60246	Porcine epidemic diarrhea virus	Colombia	Sus scrofa	2014-03-21
N	QCQ19882	Porcine epidemic diarrhea virus	China	Sus scrofa	2014-03-24
N	AKJ22115	Porcine epidemic diarrhea virus	USA	Sus scrofa	2014-03-24
N	AKJ22001	Porcine epidemic diarrhea virus	USA	Sus scrofa	2014-03-25
N	AML40881	Coronavirus HKU15	USA	Sus scrofa	2014-03-26
N	AKJ21929	Porcine epidemic diarrhea virus	USA	Sus scrofa	2014-03-27
N	AML40888	Coronavirus HKU15	USA	Sus scrofa	2014-03-27
N	AKJ21785	Porcine epidemic diarrhea virus	USA	Sus scrofa	2014-03-27
N	AIT11900	Coronavirus HKU15	South Korea	Sus scrofa	2014-04-01
N	AKJ21869	Porcine epidemic diarrhea virus	USA	Sus scrofa	2014-04-02
N	AKJ21935	Porcine epidemic diarrhea virus	USA	Sus scrofa	2014-04-02
N	AKJ21965	Porcine epidemic diarrhea virus	USA	Sus scrofa	2014-04-02
N	AML40790	Coronavirus HKU15	USA	Sus scrofa	2014-04-02
N	AML40797	Coronavirus HKU15	USA	Sus scrofa	2014-04-02
N	AKJ21737	Porcine epidemic diarrhea virus	USA	Sus scrofa	2014-04-02
N	AKJ22055	Porcine epidemic diarrhea virus	USA	Sus scrofa	2014-04-03
N	AKJ22127	Porcine epidemic diarrhea virus	USA	Sus scrofa	2014-04-03
N	AKJ21983	Porcine epidemic diarrhea virus	USA	Sus scrofa	2014-04-07
N	AKJ22109	Porcine epidemic diarrhea virus	USA	Sus scrofa	2014-04-07
N	AKJ21875	Porcine epidemic diarrhea virus	USA	Sus scrofa	2014-04-08
N	AKJ21881	Porcine epidemic diarrhea virus	USA	Sus scrofa	2014-04-16
N	AKJ21839	Porcine epidemic diarrhea virus	USA	Sus scrofa	2014-04-16
N	AKJ22121	Porcine epidemic diarrhea virus	USA	Sus scrofa	2014-04-17
N	AML40811	Coronavirus HKU15	USA	Sus scrofa	2014-04-21
N	ALM31932	Porcine epidemic diarrhea virus	USA	Sus scrofa	2014-04-22
N	AKJ22007	Porcine epidemic diarrhea virus	USA	Sus scrofa	2014-04-24
N	AKJ21743	Porcine epidemic diarrhea virus	Mexico	Sus scrofa	2014-04-24
N	AKJ22013	Porcine epidemic diarrhea virus	USA	Sus scrofa	2014-04-30
N	ARB66153	Avian coronavirus	China	Gallus gallus	2014-05-01
N	APY23488	Avian coronavirus	China	Gallus gallus	2014-05-01
N	ALA49341	Middle East respiratory syndrome-related coronavirus	Saudi Arabia	Camelus	2014-05-01
N	APU51856	Avian coronavirus	China	Gallus gallus	2014-05-01
N	AMC39584	Porcine epidemic diarrhea virus	Colombia	Sus scrofa	2014-05-02
N	AML40853	Coronavirus HKU15	USA	Sus scrofa	2014-05-06
N	ALJ32185	Coronavirus HKU15	USA	Sus scrofa	2014-05-07
N	AKJ22067	Porcine epidemic diarrhea virus	USA	Sus scrofa	2014-05-07
N	ASL68953	Hypsugo bat coronavirus HKU25	China	Hypsugo pulveratus	2014-05-08
N	ANC68207	Porcine epidemic diarrhea virus	China	Sus scrofa	2014-05-08
N	AVV62537	Middle East respiratory syndrome-related coronavirus	China		2014-05-08
N	ALM09382	Porcine epidemic diarrhea virus	China	Sus scrofa	2014-05-10
N	AQX36342	Porcine epidemic diarrhea virus	China	Sus scrofa	2014-05-12
N	ATO98108	Severe acute respiratory syndrome-related coronavirus	China	Aselliscus stoliczkanus	2014-05-12
N	AML40804	Coronavirus HKU15	USA	Sus scrofa	2014-05-13
N	AKJ21971	Porcine epidemic diarrhea virus	USA	Sus scrofa	2014-05-14
N	AKJ22133	Porcine epidemic diarrhea virus	Canada	Sus scrofa	2014-05-14
N	AKJ21791	Porcine epidemic diarrhea virus	USA	Sus scrofa	2014-05-16
N	AML40825	Coronavirus HKU15	USA	Sus scrofa	2014-05-21
N	AML40832	Coronavirus HKU15	USA	Sus scrofa	2014-05-21
N	AKJ22193	Porcine epidemic diarrhea virus	USA	Sus scrofa	2014-05-23
N	AOG30822	Rousettus bat coronavirus GCCDC1	China	Rousettus leschenaultii	2014-05-28
N	YP_009273005	Rousettus bat coronavirus GCCDC1	China	Rousettus leschenaultii	2014-05-28
N	AKJ22199	Porcine epidemic diarrhea virus	USA	Sus scrofa	2014-05-30
N	ASU45851	Middle East respiratory syndrome-related coronavirus	United Arab Emirates	Camelus	2014-06-01
N	AJG44058	Middle East respiratory syndrome-related coronavirus	United Arab Emirates	Camelus dromedarius	2014-06-01
N	AJG44069	Middle East respiratory syndrome-related coronavirus	United Arab Emirates	Camelus dromedarius	2014-06-01
N	AJG44080	Middle East respiratory syndrome-related coronavirus	United Arab Emirates	Camelus dromedarius	2014-06-01
N	AJG44091	Middle East respiratory syndrome-related coronavirus	United Arab Emirates	Camelus dromedarius	2014-06-01
N	AJG44102	Middle East respiratory syndrome-related coronavirus	United Arab Emirates	Camelus dromedarius	2014-06-01
N	AJG44113	Middle East respiratory syndrome-related coronavirus	United Arab Emirates	Camelus dromedarius	2014-06-01
N	ALA50088	Human coronavirus 229E	Saudi Arabia	Camelus	2014-06-01
N	ALA50095	Human coronavirus 229E	Saudi Arabia	Camelus	2014-06-01
N	ALA50102	Human coronavirus 229E	Saudi Arabia	Camelus	2014-06-01
N	ASU45862	Middle East respiratory syndrome-related coronavirus	United Arab Emirates	Camelus	2014-06-01
N	ASU45818	Middle East respiratory syndrome-related coronavirus	United Arab Emirates	Camelus	2014-06-01
N	ANI69824	Middle East respiratory syndrome-related coronavirus	United Arab Emirates	Camelus dromedarius	2014-06-02
N	AML40902	Coronavirus HKU15	USA	Sus scrofa	2014-06-05
N	QCQ19906	Porcine epidemic diarrhea virus	China	Sus scrofa	2014-06-06
N	QCQ19870	Porcine epidemic diarrhea virus	China	Sus scrofa	2014-06-07
N	AKJ22139	Porcine epidemic diarrhea virus	USA	Sus scrofa	2014-06-10
N	AYR18505	Alphacoronavirus sp.	Viet Nam	Scotophilus kuhlii	2014-06-10
N	AYR18455	Alphacoronavirus sp.	Viet Nam	Scotophilus kuhlii	2014-06-10
N	AYR18493	Alphacoronavirus sp.	Viet Nam	Scotophilus kuhlii	2014-06-10
N	AYR18461	Alphacoronavirus sp.	Viet Nam	Scotophilus kuhlii	2014-06-10
N	AYR18436	Alphacoronavirus sp.	Viet Nam	Scotophilus kuhlii	2014-06-10
N	AYR18473	Alphacoronavirus sp.	Viet Nam	Scotophilus kuhlii	2014-06-10
N	AYR18487	Alphacoronavirus sp.	Viet Nam	Scotophilus kuhlii	2014-06-10
N	AYR18511	Alphacoronavirus sp.	Viet Nam	Scotophilus kuhlii	2014-06-11
N	AYR18400	Alphacoronavirus sp.	Viet Nam	Scotophilus kuhlii	2014-06-11
N	AYR18481	Alphacoronavirus sp.	Viet Nam	Scotophilus kuhlii	2014-06-11
N	AYR18499	Alphacoronavirus sp.	Viet Nam	Scotophilus kuhlii	2014-06-11
N	AYR18412	Alphacoronavirus sp.	Viet Nam	Scotophilus kuhlii	2014-06-17
N	AYR18442	Alphacoronavirus sp.	Viet Nam	Scotophilus kuhlii	2014-06-17
N	AYR18418	Alphacoronavirus sp.	Viet Nam	Scotophilus kuhlii	2014-06-17
N	AYR18406	Alphacoronavirus sp.	Viet Nam	Scotophilus kuhlii	2014-06-17
N	AYR18430	Alphacoronavirus sp.	Viet Nam	Scotophilus kuhlii	2014-06-17
N	AYR18424	Alphacoronavirus sp.	Viet Nam	Scotophilus kuhlii	2014-06-17
N	AYR18448	Alphacoronavirus sp.	Viet Nam	Scotophilus kuhlii	2014-06-17
N	AYR18479	Alphacoronavirus sp.	Viet Nam	Scotophilus kuhlii	2014-06-17
N	AML83916	Coronavirus HKU15	China		2014-06-26
N	ALA49352	Middle East respiratory syndrome-related coronavirus	Saudi Arabia	Camelus	2014-07-01
N	ALA49363	Middle East respiratory syndrome-related coronavirus	Saudi Arabia	Camelus	2014-07-01
N	ARJ31774	Coronavirus HKU15	South Korea	Sus scrofa	2014-07-01
N	APY26870	Avian coronavirus	China	Gallus gallus	2014-07-01
N	QCQ19888	Porcine epidemic diarrhea virus	China	Sus scrofa	2014-07-11
N	AKH45338	Porcine epidemic diarrhea virus	Thailand	Sus scrofa	2014-07-15
N	AKH45344	Porcine epidemic diarrhea virus	Thailand	Sus scrofa	2014-07-15
N	QCI31469	Middle East respiratory syndrome-related coronavirus	Saudi Arabia	Camelus dromedarius	2014-07-15
N	QCI31480	Middle East respiratory syndrome-related coronavirus	Saudi Arabia	Camelus dromedarius	2014-07-15
N	AVU05438	Porcine epidemic diarrhea virus	Mexico	Sus scrofa	2014-07-19
N	AVU05459	Porcine epidemic diarrhea virus	Mexico	Sus scrofa	2014-07-19
N	AVU05361	Porcine epidemic diarrhea virus	Mexico	Sus scrofa	2014-07-19
N	AKV62755	Alphacoronavirus 1	USA	Sus scrofa	2014-07-24
N	QCQ19900	Porcine epidemic diarrhea virus	China	Sus scrofa	2014-07-28
N	QCQ19894	Porcine epidemic diarrhea virus	China	Sus scrofa	2014-07-28
N	QGA70702	Erinaceus hedgehog coronavirus HKU31	China	Erinaceus amurensis	2014-08-01
N	ANA67905	Porcine epidemic diarrhea virus	China	Sus scrofa	2014-08-01
N	QGA70692	Erinaceus hedgehog coronavirus HKU31	China	Erinaceus amurensis	2014-08-01
N	QCQ20074	Porcine epidemic diarrhea virus	China	Sus scrofa	2014-08-01
N	ALM09388	Porcine epidemic diarrhea virus	China	Sus scrofa	2014-08-08
N	AKJ21773	Porcine epidemic diarrhea virus	USA	Sus scrofa	2014-08-18
N	QCQ19840	Porcine epidemic diarrhea virus	China	Sus scrofa	2014-08-21
N	AKJ22181	Porcine epidemic diarrhea virus	USA	Sus scrofa	2014-08-28
N	AKJ22187	Porcine epidemic diarrhea virus	USA	Sus scrofa	2014-08-28
N	ANI21149	Avian coronavirus	China	Gallus gallus	2014-09-01
N	ANA67916	Porcine epidemic diarrhea virus	China	Sus scrofa	2014-09-01
N	ANA67917	Porcine epidemic diarrhea virus	China	Sus scrofa	2014-09-01
N	ANA67918	Porcine epidemic diarrhea virus	China	Sus scrofa	2014-09-01
N	ALA49374	Middle East respiratory syndrome-related coronavirus	Saudi Arabia	Camelus	2014-09-01
N	ALA49660	Middle East respiratory syndrome-related coronavirus	Saudi Arabia	Camelus	2014-09-01
N	ALA49671	Middle East respiratory syndrome-related coronavirus	Saudi Arabia	Camelus	2014-09-01
N	ALA49682	Middle East respiratory syndrome-related coronavirus	Saudi Arabia	Camelus	2014-09-01
N	ALA49693	Middle East respiratory syndrome-related coronavirus	Saudi Arabia	Camelus	2014-09-01
N	ALA49704	Middle East respiratory syndrome-related coronavirus	Saudi Arabia	Camelus	2014-09-01
N	ALL26396	Middle East respiratory syndrome-related coronavirus	Saudi Arabia	Camelus dromedarius	2014-09-01
N	ALL26409	Middle East respiratory syndrome-related coronavirus	Saudi Arabia	Camelus dromedarius	2014-09-01
N	ALS35474	Porcine epidemic diarrhea virus	China		2014-09-11
N	AYR18467	Alphacoronavirus sp.	Viet Nam	Scotophilus kuhlii	2014-09-16
N	AYR18525	Alphacoronavirus sp.	Viet Nam	Scotophilus kuhlii	2014-09-16
N	AYR18519	Alphacoronavirus sp.	Viet Nam	Scotophilus kuhlii	2014-09-17
N	AYR18513	Alphacoronavirus sp.	Viet Nam	Scotophilus kuhlii	2014-09-18
N	AYR18537	Alphacoronavirus sp.	Viet Nam	Scotophilus kuhlii	2014-09-18
N	AYR18531	Alphacoronavirus sp.	Viet Nam	Scotophilus kuhlii	2014-09-18
N	AKJ21899	Porcine epidemic diarrhea virus	USA	Sus scrofa	2014-09-26
N	AKJ22019	Porcine epidemic diarrhea virus	USA	Sus scrofa	2014-09-30
N	ANJ04717	Betacoronavirus 1	Bangladesh	Bubalus bubalis	2014-10-01
N	ANJ04728	Betacoronavirus 1	Bangladesh	Bubalus bubalis	2014-10-01
N	ANA67913	Porcine epidemic diarrhea virus	China	Sus scrofa	2014-10-01
N	ALA49616	Middle East respiratory syndrome-related coronavirus	Saudi Arabia	Camelus	2014-10-01
N	ALA49627	Middle East respiratory syndrome-related coronavirus	Saudi Arabia	Camelus	2014-10-01
N	ALA49638	Middle East respiratory syndrome-related coronavirus	Saudi Arabia	Camelus	2014-10-01
N	ALA49649	Middle East respiratory syndrome-related coronavirus	Saudi Arabia	Camelus	2014-10-01
N	ALA50109	Human coronavirus 229E	Saudi Arabia	Camelus	2014-10-01
N	ALA50116	Human coronavirus 229E	Saudi Arabia	Camelus	2014-10-01
N	ALA50123	Human coronavirus 229E	Saudi Arabia	Camelus	2014-10-01
N	AKH45326	Porcine epidemic diarrhea virus	Thailand	Sus scrofa	2014-10-10
N	AKH45332	Porcine epidemic diarrhea virus	Thailand	Sus scrofa	2014-10-10
N	ALM31938	Porcine epidemic diarrhea virus	USA	Sus scrofa	2014-10-14
N	AKJ21887	Porcine epidemic diarrhea virus	USA	Sus scrofa	2014-10-14
N	ALR74757	Porcine epidemic diarrhea virus	Viet Nam	Sus scrofa	2014-10-15
N	ALM31944	Porcine epidemic diarrhea virus	USA	Sus scrofa	2014-10-19
N	AND76936	Porcine epidemic diarrhea virus	China	Sus scrofa	2014-10-20
N	AUZ98436	Porcine epidemic diarrhea virus	South Korea	Sus scrofa	2014-10-23
N	ATO98218	Severe acute respiratory syndrome-related coronavirus	China	Rhinolophus sinicus	2014-10-24
N	AKJ22061	Porcine epidemic diarrhea virus	USA	Sus scrofa	2014-10-30
N	AKJ21749	Porcine epidemic diarrhea virus	USA	Sus scrofa	2014-10-31
N	AMR60833	Porcine epidemic diarrhea virus	China	Sus scrofa	2014-11-01
N	APZ73807	Avian coronavirus	China	Gallus gallus	2014-11-01
N	ALA49583	Middle East respiratory syndrome-related coronavirus	Saudi Arabia	Camelus	2014-11-01
N	ALA49594	Middle East respiratory syndrome-related coronavirus	Saudi Arabia	Camelus	2014-11-01
N	ALA49605	Middle East respiratory syndrome-related coronavirus	Saudi Arabia	Camelus	2014-11-01
N	ALA50130	Human coronavirus 229E	Saudi Arabia	Camelus	2014-11-01
N	ALA50137	Human coronavirus 229E	Saudi Arabia	Camelus	2014-11-01
N	ALA50144	Human coronavirus 229E	Saudi Arabia	Camelus	2014-11-01
N	ALA50151	Human coronavirus 229E	Saudi Arabia	Camelus	2014-11-01
N	AKS50222	Porcine epidemic diarrhea virus	South Korea	Sus scrofa	2014-11-01
N	AKS50238	Porcine epidemic diarrhea virus	South Korea	Sus scrofa	2014-11-01
N	AKS50244	Porcine epidemic diarrhea virus	South Korea	Sus scrofa	2014-11-01
N	AVU05431	Porcine epidemic diarrhea virus	Mexico	Sus scrofa	2014-11-08
N	ALM09394	Porcine epidemic diarrhea virus	China	Sus scrofa	2014-11-11
N	AYR18634	Betacoronavirus sp.	Viet Nam	Rattus argentiventer	2014-11-12
N	AYR18616	Betacoronavirus sp.	Viet Nam	Rattus argentiventer	2014-11-12
N	AYR18543	Alphacoronavirus sp.	Viet Nam	Scotophilus kuhlii	2014-11-12
N	AYR18652	Betacoronavirus sp.	Viet Nam	Rattus argentiventer	2014-11-12
N	AYR18607	Betacoronavirus sp.	Viet Nam	Rattus argentiventer	2014-11-12
N	AYR18625	Betacoronavirus sp.	Viet Nam	Rattus argentiventer	2014-11-12
N	AYR18643	Betacoronavirus sp.	Viet Nam	Rattus argentiventer	2014-11-12
N	AKO63237	Porcine epidemic diarrhea virus	USA	Sus scrofa	2014-11-13
N	AKJ21713	Porcine epidemic diarrhea virus	USA	Sus scrofa	2014-11-13
N	AYR18549	Alphacoronavirus sp.	Viet Nam	Scotophilus kuhlii	2014-11-13
N	AYR18561	Alphacoronavirus sp.	Viet Nam	Scotophilus kuhlii	2014-11-13
N	AYR18555	Alphacoronavirus sp.	Viet Nam	Scotophilus kuhlii	2014-11-13
N	AYR18599	Betacoronavirus sp.	Viet Nam	Rattus argentiventer	2014-11-14
N	AKJ22151	Porcine epidemic diarrhea virus	USA	Sus scrofa	2014-11-18
N	ALJ52504	Porcine epidemic diarrhea virus	Ukraine	Sus scrofa	2014-11-22
N	ALS54086	Coronavirus HKU15	China	Sus scrofa	2014-11-24
N	AMR69050	Coronavirus HKU15	China		2014-11-29
N	APY20694	Avian coronavirus	Sudan	Gallus gallus	2014-12-01
N	ANA67920	Porcine epidemic diarrhea virus	China	Sus scrofa	2014-12-01
N	ANA67921	Porcine epidemic diarrhea virus	China	Sus scrofa	2014-12-01
N	ALA49385	Middle East respiratory syndrome-related coronavirus	Saudi Arabia	Camelus	2014-12-01
N	ALA49396	Middle East respiratory syndrome-related coronavirus	Saudi Arabia	Camelus	2014-12-01
N	ALA49407	Middle East respiratory syndrome-related coronavirus	Saudi Arabia	Camelus	2014-12-01
N	ALA49418	Middle East respiratory syndrome-related coronavirus	Saudi Arabia	Camelus	2014-12-01
N	ALA49429	Middle East respiratory syndrome-related coronavirus	Saudi Arabia	Camelus	2014-12-01
N	ALA49440	Middle East respiratory syndrome-related coronavirus	Saudi Arabia	Camelus	2014-12-01
N	ALA49451	Middle East respiratory syndrome-related coronavirus	Saudi Arabia	Camelus	2014-12-01
N	ALA49462	Middle East respiratory syndrome-related coronavirus	Saudi Arabia	Camelus	2014-12-01
N	ALA49473	Middle East respiratory syndrome-related coronavirus	Saudi Arabia	Camelus	2014-12-01
N	ALA49484	Middle East respiratory syndrome-related coronavirus	Saudi Arabia	Camelus	2014-12-01
N	ALA49495	Middle East respiratory syndrome-related coronavirus	Saudi Arabia	Camelus	2014-12-01
N	ALA49506	Middle East respiratory syndrome-related coronavirus	Saudi Arabia	Camelus	2014-12-01
N	ALA49517	Middle East respiratory syndrome-related coronavirus	Saudi Arabia	Camelus	2014-12-01
N	ALA49528	Middle East respiratory syndrome-related coronavirus	Saudi Arabia	Camelus	2014-12-01
N	ALA49539	Middle East respiratory syndrome-related coronavirus	Saudi Arabia	Camelus	2014-12-01
N	ALA49550	Middle East respiratory syndrome-related coronavirus	Saudi Arabia	Camelus	2014-12-01
N	ALA49561	Middle East respiratory syndrome-related coronavirus	Saudi Arabia	Camelus	2014-12-01
N	ALA49572	Middle East respiratory syndrome-related coronavirus	Saudi Arabia	Camelus	2014-12-01
N	ALA50158	Human coronavirus 229E	Saudi Arabia	Camelus	2014-12-01
N	ALA50165	Human coronavirus 229E	Saudi Arabia	Camelus	2014-12-01
N	ALA50172	Human coronavirus 229E	Saudi Arabia	Camelus	2014-12-01
N	ALA50179	Human coronavirus 229E	Saudi Arabia	Camelus	2014-12-01
N	ALA50186	Human coronavirus 229E	Saudi Arabia	Camelus	2014-12-01
N	ALB08472	Porcine epidemic diarrhea virus	China	Sus scrofa	2014-12-01
N	AKE47378	Porcine epidemic diarrhea virus	France	Sus scrofa	2014-12-01
N	AKJ22091	Porcine epidemic diarrhea virus	USA	Sus scrofa	2014-12-04
N	AKJ22205	Porcine epidemic diarrhea virus	USA	Sus scrofa	2014-12-04
N	AKJ22145	Porcine epidemic diarrhea virus	USA	Sus scrofa	2014-12-12
N	AKJ21719	Porcine epidemic diarrhea virus	USA	Sus scrofa	2014-12-12
N	ANI69835	Middle East respiratory syndrome-related coronavirus	United Arab Emirates	Camelus dromedarius	2014-12-13
N	AKC54442	Coronavirus HKU15	China	Sus scrofa	2014-12-20
N	AKC54435	Coronavirus HKU15	China	Sus scrofa	2014-12-26
N	ASU62488	Alphacoronavirus 1	Belgium	Felis catus	2015-01-01
N	AKC34872	Porcine epidemic diarrhea virus	Belgium	Sus scrofa	2015-01-01
N	ALA49715	Middle East respiratory syndrome-related coronavirus	Saudi Arabia	Camelus	2015-01-01
N	ALA49726	Middle East respiratory syndrome-related coronavirus	Saudi Arabia	Camelus	2015-01-01
N	ALA49737	Middle East respiratory syndrome-related coronavirus	Saudi Arabia	Camelus	2015-01-01
N	ALA49748	Middle East respiratory syndrome-related coronavirus	Saudi Arabia	Camelus	2015-01-01
N	ALA49759	Middle East respiratory syndrome-related coronavirus	Saudi Arabia	Camelus	2015-01-01
N	ALA49770	Middle East respiratory syndrome-related coronavirus	Saudi Arabia	Camelus	2015-01-01
N	ALA49781	Middle East respiratory syndrome-related coronavirus	Saudi Arabia	Camelus	2015-01-01
N	ALA49792	Middle East respiratory syndrome-related coronavirus	Saudi Arabia	Camelus	2015-01-01
N	ALA50207	Human coronavirus 229E	Saudi Arabia	Camelus	2015-01-01
N	ALA50214	Human coronavirus 229E	Saudi Arabia	Camelus	2015-01-01
N	ALA50221	Human coronavirus 229E	Saudi Arabia	Camelus	2015-01-01
N	ALA50228	Human coronavirus 229E	Saudi Arabia	Camelus	2015-01-01
N	AQZ41296	Middle East respiratory syndrome-related coronavirus	Oman	Camelus	2015-01-01
N	AOM53015	Porcine epidemic diarrhea virus	China	Sus scrofa	2015-01-05
N	QGQ60288	Porcine epidemic diarrhea virus	Colombia	Sus scrofa	2015-01-06
N	ANI85758	Porcine epidemic diarrhea virus	USA	Sus scrofa	2015-01-09
N	QGQ60216	Porcine epidemic diarrhea virus	Colombia	Sus scrofa	2015-01-09
N	AVN89354	Middle East respiratory syndrome-related coronavirus	Nigeria	Camelus dromedarius	2015-01-13
N	AQT33894	Porcine epidemic diarrhea virus	China	Sus scrofa	2015-01-16
N	ALL74066	Porcine epidemic diarrhea virus	South Korea	Sus scrofa	2015-01-16
N	AOM53008	Porcine epidemic diarrhea virus	China	Sus scrofa	2015-01-25
N	ALF39589	Porcine epidemic diarrhea virus	China	Sus scrofa	2015-01-27
N	QGQ60222	Porcine epidemic diarrhea virus	Colombia	Sus scrofa	2015-01-29
N	ANI69846	Middle East respiratory syndrome-related coronavirus	United Arab Emirates	Camelus dromedarius	2015-01-30
N	ASU62499	Alphacoronavirus 1	Denmark	Felis catus	2015-02-01
N	ANA67908	Porcine epidemic diarrhea virus	China	Sus scrofa	2015-02-01
N	ANA67910	Porcine epidemic diarrhea virus	China	Sus scrofa	2015-02-01
N	ANA67911	Porcine epidemic diarrhea virus	China	Sus scrofa	2015-02-01
N	ALA49803	Middle East respiratory syndrome-related coronavirus	Saudi Arabia	Camelus	2015-02-01
N	ALA49814	Middle East respiratory syndrome-related coronavirus	Saudi Arabia	Camelus	2015-02-01
N	AYR18679	Betacoronavirus sp.	Viet Nam	Rattus argentiventer	2015-02-04
N	AYR18688	Betacoronavirus sp.	Viet Nam	Rattus argentiventer	2015-02-04
N	AYR18670	Betacoronavirus sp.	Viet Nam	Rattus argentiventer	2015-02-04
N	AYR18585	Alphacoronavirus sp.	Viet Nam	Scotophilus kuhlii	2015-02-06
N	AYR18567	Alphacoronavirus sp.	Viet Nam	Scotophilus kuhlii	2015-02-06
N	AYR18573	Alphacoronavirus sp.	Viet Nam	Scotophilus kuhlii	2015-02-06
N	AYR18591	Alphacoronavirus sp.	Viet Nam	Scotophilus kuhlii	2015-02-06
N	ANI69857	Middle East respiratory syndrome-related coronavirus	United Arab Emirates	Camelus dromedarius	2015-02-12
N	AYR18579	Alphacoronavirus sp.	Viet Nam	Scotophilus kuhlii	2015-02-13
N	ANI69868	Middle East respiratory syndrome-related coronavirus	United Arab Emirates	Camelus dromedarius	2015-02-14
N	ARQ03269	Porcine epidemic diarrhea virus	China	Sus scrofa	2015-02-14
N	ANI69878	Middle East respiratory syndrome-related coronavirus	United Arab Emirates	Camelus dromedarius	2015-02-15
N	ANA78443	Coronavirus HKU15	China	Sus scrofa	2015-02-16
N	QEY10625	Betacoronavirus 1	Ethiopia	Camelus dromedarius	2015-02-21
N	AVN89334	Middle East respiratory syndrome-related coronavirus	Burkina Faso	Camelus dromedarius	2015-02-23
N	ASU90241	Middle East respiratory syndrome-related coronavirus	United Arab Emirates	Camelus dromedarius	2015-03-01
N	ANA67909	Porcine epidemic diarrhea virus	China	Sus scrofa	2015-03-01
N	ANA67912	Porcine epidemic diarrhea virus	China	Sus scrofa	2015-03-01
N	ANA67914	Porcine epidemic diarrhea virus	China	Sus scrofa	2015-03-01
N	ALA49825	Middle East respiratory syndrome-related coronavirus	Saudi Arabia	Camelus	2015-03-01
N	ALA49836	Middle East respiratory syndrome-related coronavirus	Saudi Arabia	Camelus	2015-03-01
N	ALA49847	Middle East respiratory syndrome-related coronavirus	Saudi Arabia	Camelus	2015-03-01
N	ALA49858	Middle East respiratory syndrome-related coronavirus	Saudi Arabia	Camelus	2015-03-01
N	ALA49869	Middle East respiratory syndrome-related coronavirus	Saudi Arabia	Camelus	2015-03-01
N	ALA49880	Middle East respiratory syndrome-related coronavirus	Saudi Arabia	Camelus	2015-03-01
N	ALA49891	Middle East respiratory syndrome-related coronavirus	Saudi Arabia	Camelus	2015-03-01
N	ALA49902	Middle East respiratory syndrome-related coronavirus	Saudi Arabia	Camelus	2015-03-01
N	ALA49913	Middle East respiratory syndrome-related coronavirus	Saudi Arabia	Camelus	2015-03-01
N	ALA49924	Middle East respiratory syndrome-related coronavirus	Saudi Arabia	Camelus	2015-03-01
N	ALA49935	Middle East respiratory syndrome-related coronavirus	Saudi Arabia	Camelus	2015-03-01
N	ALA49946	Middle East respiratory syndrome-related coronavirus	Saudi Arabia	Camelus	2015-03-01
N	ALA50056	Middle East respiratory syndrome-related coronavirus	Saudi Arabia	Camelus	2015-03-01
N	ALA50067	Middle East respiratory syndrome-related coronavirus	Saudi Arabia	Camelus	2015-03-01
N	ALA50080	Camel coronavirus HKU23	Saudi Arabia	Camelus	2015-03-01
N	ALA50193	Human coronavirus 229E	Saudi Arabia	Camelus	2015-03-01
N	ALA50200	Human coronavirus 229E	Saudi Arabia	Camelus	2015-03-01
N	ALA50249	Human coronavirus 229E	Saudi Arabia	Camelus	2015-03-01
N	ALA50256	Human coronavirus 229E	Saudi Arabia	Camelus	2015-03-01
N	ALA13745	Coronavirus HKU15	China	Sus scrofa	2015-03-01
N	ASU90208	Middle East respiratory syndrome-related coronavirus	United Arab Emirates	Camelus dromedarius	2015-03-01
N	ASU90197	Middle East respiratory syndrome-related coronavirus	United Arab Emirates	Camelus dromedarius	2015-03-01
N	ASU90901	Middle East respiratory syndrome-related coronavirus	United Arab Emirates	Camelus dromedarius	2015-03-01
N	ASU90681	Middle East respiratory syndrome-related coronavirus	United Arab Emirates	Camelus dromedarius	2015-03-01
N	ASU90747	Middle East respiratory syndrome-related coronavirus	United Arab Emirates	Camelus dromedarius	2015-03-01
N	ASU90186	Middle East respiratory syndrome-related coronavirus	United Arab Emirates	Camelus dromedarius	2015-03-01
N	ASU90252	Middle East respiratory syndrome-related coronavirus	United Arab Emirates	Camelus dromedarius	2015-03-01
N	ASU90384	Middle East respiratory syndrome-related coronavirus	United Arab Emirates	Camelus dromedarius	2015-03-01
N	ASU90758	Middle East respiratory syndrome-related coronavirus	United Arab Emirates	Camelus dromedarius	2015-03-01
N	ASU90373	Middle East respiratory syndrome-related coronavirus	United Arab Emirates	Camelus dromedarius	2015-03-01
N	ASU89933	Middle East respiratory syndrome-related coronavirus	United Arab Emirates	Camelus dromedarius	2015-03-01
N	ASU90593	Middle East respiratory syndrome-related coronavirus	United Arab Emirates	Camelus dromedarius	2015-03-01
N	ASU90032	Middle East respiratory syndrome-related coronavirus	United Arab Emirates	Camelus dromedarius	2015-03-01
N	ASU90692	Middle East respiratory syndrome-related coronavirus	United Arab Emirates	Camelus dromedarius	2015-03-01
N	ASU90494	Middle East respiratory syndrome-related coronavirus	United Arab Emirates	Camelus dromedarius	2015-03-01
N	ASU90340	Middle East respiratory syndrome-related coronavirus	United Arab Emirates	Camelus dromedarius	2015-03-01
N	ASU90846	Middle East respiratory syndrome-related coronavirus	United Arab Emirates	Camelus dromedarius	2015-03-01
N	ASU91032	Middle East respiratory syndrome-related coronavirus	United Arab Emirates	Camelus dromedarius	2015-03-01
N	ASU90879	Middle East respiratory syndrome-related coronavirus	United Arab Emirates	Camelus dromedarius	2015-03-01
N	ASU90010	Middle East respiratory syndrome-related coronavirus	United Arab Emirates	Camelus dromedarius	2015-03-01
N	ASU90670	Middle East respiratory syndrome-related coronavirus	United Arab Emirates	Camelus dromedarius	2015-03-01
N	ASU90054	Middle East respiratory syndrome-related coronavirus	United Arab Emirates	Camelus dromedarius	2015-03-01
N	ASU90615	Middle East respiratory syndrome-related coronavirus	United Arab Emirates	Camelus dromedarius	2015-03-01
N	ASU90076	Middle East respiratory syndrome-related coronavirus	United Arab Emirates	Camelus dromedarius	2015-03-01
N	ASU89955	Middle East respiratory syndrome-related coronavirus	United Arab Emirates	Camelus dromedarius	2015-03-01
N	ASU90560	Middle East respiratory syndrome-related coronavirus	United Arab Emirates	Camelus dromedarius	2015-03-01
N	ASU90043	Middle East respiratory syndrome-related coronavirus	United Arab Emirates	Camelus dromedarius	2015-03-01
N	ASU90109	Middle East respiratory syndrome-related coronavirus	United Arab Emirates	Camelus dromedarius	2015-03-01
N	ASU90098	Middle East respiratory syndrome-related coronavirus	United Arab Emirates	Camelus dromedarius	2015-03-01
N	ASU90164	Middle East respiratory syndrome-related coronavirus	United Arab Emirates	Camelus dromedarius	2015-03-01
N	ASU90648	Middle East respiratory syndrome-related coronavirus	United Arab Emirates	Camelus dromedarius	2015-03-01
N	ASU90604	Middle East respiratory syndrome-related coronavirus	United Arab Emirates	Camelus dromedarius	2015-03-01
N	ASU89966	Middle East respiratory syndrome-related coronavirus	United Arab Emirates	Camelus dromedarius	2015-03-01
N	ASU90714	Middle East respiratory syndrome-related coronavirus	United Arab Emirates	Camelus dromedarius	2015-03-01
N	ASU90626	Middle East respiratory syndrome-related coronavirus	United Arab Emirates	Camelus dromedarius	2015-03-01
N	ASU90725	Middle East respiratory syndrome-related coronavirus	United Arab Emirates	Camelus dromedarius	2015-03-01
N	ASU90780	Middle East respiratory syndrome-related coronavirus	United Arab Emirates	Camelus dromedarius	2015-03-01
N	ASU90659	Middle East respiratory syndrome-related coronavirus	United Arab Emirates	Camelus dromedarius	2015-03-01
N	ASU90571	Middle East respiratory syndrome-related coronavirus	United Arab Emirates	Camelus dromedarius	2015-03-01
N	ASU90065	Middle East respiratory syndrome-related coronavirus	United Arab Emirates	Camelus dromedarius	2015-03-01
N	ASU90120	Middle East respiratory syndrome-related coronavirus	United Arab Emirates	Camelus dromedarius	2015-03-01
N	ASU90142	Middle East respiratory syndrome-related coronavirus	United Arab Emirates	Camelus dromedarius	2015-03-01
N	ASU90549	Middle East respiratory syndrome-related coronavirus	United Arab Emirates	Camelus dromedarius	2015-03-01
N	ASU90021	Middle East respiratory syndrome-related coronavirus	United Arab Emirates	Camelus dromedarius	2015-03-01
N	ASU90637	Middle East respiratory syndrome-related coronavirus	United Arab Emirates	Camelus dromedarius	2015-03-01
N	ASU89988	Middle East respiratory syndrome-related coronavirus	United Arab Emirates	Camelus dromedarius	2015-03-01
N	ASU90131	Middle East respiratory syndrome-related coronavirus	United Arab Emirates	Camelus dromedarius	2015-03-01
N	ASU90219	Middle East respiratory syndrome-related coronavirus	United Arab Emirates	Camelus dromedarius	2015-03-01
N	ASU90263	Middle East respiratory syndrome-related coronavirus	United Arab Emirates	Camelus dromedarius	2015-03-01
N	ASU90923	Middle East respiratory syndrome-related coronavirus	United Arab Emirates	Camelus dromedarius	2015-03-01
N	ASU90824	Middle East respiratory syndrome-related coronavirus	United Arab Emirates	Camelus dromedarius	2015-03-01
N	ASU90505	Middle East respiratory syndrome-related coronavirus	United Arab Emirates	Camelus dromedarius	2015-03-01
N	ASU90395	Middle East respiratory syndrome-related coronavirus	United Arab Emirates	Camelus dromedarius	2015-03-01
N	ASU90966	Middle East respiratory syndrome-related coronavirus	United Arab Emirates	Camelus dromedarius	2015-03-01
N	ASU90956	Middle East respiratory syndrome-related coronavirus	United Arab Emirates	Camelus dromedarius	2015-03-01
N	ASU90582	Middle East respiratory syndrome-related coronavirus	United Arab Emirates	Camelus dromedarius	2015-03-01
N	ASU90912	Middle East respiratory syndrome-related coronavirus	United Arab Emirates	Camelus dromedarius	2015-03-01
N	ASU89921	Middle East respiratory syndrome-related coronavirus	United Arab Emirates	Camelus dromedarius	2015-03-01
N	ASU90978	Middle East respiratory syndrome-related coronavirus	United Arab Emirates	Camelus dromedarius	2015-03-01
N	ASU90483	Middle East respiratory syndrome-related coronavirus	United Arab Emirates	Camelus dromedarius	2015-03-01
N	ASU90406	Middle East respiratory syndrome-related coronavirus	United Arab Emirates	Camelus dromedarius	2015-03-01
N	ASU90857	Middle East respiratory syndrome-related coronavirus	United Arab Emirates	Camelus dromedarius	2015-03-01
N	ASU90945	Middle East respiratory syndrome-related coronavirus	United Arab Emirates	Camelus dromedarius	2015-03-01
N	ASU91065	Middle East respiratory syndrome-related coronavirus	United Arab Emirates	Camelus dromedarius	2015-03-01
N	ASU89977	Middle East respiratory syndrome-related coronavirus	United Arab Emirates	Camelus dromedarius	2015-03-01
N	ASU90791	Middle East respiratory syndrome-related coronavirus	United Arab Emirates	Camelus dromedarius	2015-03-01
N	ASU90175	Middle East respiratory syndrome-related coronavirus	United Arab Emirates	Camelus dromedarius	2015-03-01
N	ASU90087	Middle East respiratory syndrome-related coronavirus	United Arab Emirates	Camelus dromedarius	2015-03-01
N	ASU90988	Middle East respiratory syndrome-related coronavirus	United Arab Emirates	Camelus dromedarius	2015-03-01
[truncated: 667 more rows]
