# Supplementary material for: Using the spike protein feature to predict infection risk and monitor the evolutionary dynamic of coronavirus
Source: Infect Dis Poverty. 2020 Mar 25;9:33. doi: 10.1186/s40249-020-00649-8 (PMC7093988; doi:10.1186/s40249-020-00649-8)
Supplement: Supplementary file 2 — Additional file 2. [file 40249_2020_649_MOESM2_ESM.xlsx]

## Sheet: Sheet1
ID	X1	X2	Nomenclature
AIZ74417	-0.0158765	-0.00202066	Middle East respiratory syndrome-related coronavirus
ANF29195	-0.0158605	-0.0017817	Middle East respiratory syndrome-related coronavirus
ATG84833	-0.0158197	-0.00178106	Middle East respiratory syndrome-related coronavirus
AVV61900	-0.0158188	-0.00217622	Middle East respiratory syndrome-related coronavirus
AIY60578	-0.0157825	-0.00225048	Middle East respiratory syndrome-related coronavirus
ASU45730	-0.0157825	-0.0022505	Middle East respiratory syndrome-related coronavirus
AKM76229	-0.0157667	-0.00224015	Middle East respiratory syndrome-related coronavirus
ATG84701	-0.0157655	-0.00170663	Middle East respiratory syndrome-related coronavirus
AKN24803	-0.0157646	-0.00184146	Middle East respiratory syndrome-related coronavirus
ANC28656	-0.0157595	-0.00206346	Middle East respiratory syndrome-related coronavirus
ANC28645	-0.0157466	-0.00205529	Middle East respiratory syndrome-related coronavirus
ALD51904	-0.0157454	-0.00203918	Middle East respiratory syndrome-related coronavirus
AYM48030	-0.0157454	-0.00211107	Middle East respiratory syndrome-related coronavirus
ATG84690	-0.0157317	-0.00210445	Middle East respiratory syndrome-related coronavirus
ASU45807	-0.0157202	-0.00200875	Middle East respiratory syndrome-related coronavirus
QBF80532	-0.0157193	-0.00211713	Middle East respiratory syndrome-related coronavirus
AKI29284	-0.0157155	-0.00209104	Middle East respiratory syndrome-related coronavirus
AKI29275	-0.0157155	-0.00209104	Middle East respiratory syndrome-related coronavirus
AKI29265	-0.0157155	-0.00209103	Middle East respiratory syndrome-related coronavirus
AKM76239	-0.0157133	-0.00232164	Middle East respiratory syndrome-related coronavirus
AXG21654	-0.0157108	-0.00217738	Middle East respiratory syndrome-related coronavirus
QBF80455	-0.01571	-0.00212913	Middle East respiratory syndrome-related coronavirus
QBF80477	-0.01571	-0.00212907	Middle East respiratory syndrome-related coronavirus
QBF80466	-0.0157099	-0.00212911	Middle East respiratory syndrome-related coronavirus
QBF80611	-0.0157092	-0.00204167	Middle East respiratory syndrome-related coronavirus
AHC74098	-0.0157091	-0.00217541	Middle East respiratory syndrome-related coronavirus
AHC74088	-0.015709	-0.00217529	Middle East respiratory syndrome-related coronavirus
AIY60528	-0.0157074	-0.00199597	Middle East respiratory syndrome-related coronavirus
AHI48550	-0.0157029	-0.00204957	Middle East respiratory syndrome-related coronavirus
ALB08322	-0.0157025	-0.00194848	Middle East respiratory syndrome-related coronavirus
AKI29255	-0.0156986	-0.00207981	Middle East respiratory syndrome-related coronavirus
YP_009047204	-0.0156927	-0.00203775	Middle East respiratory syndrome-related coronavirus
ANC28667	-0.0156907	-0.00205908	Middle East respiratory syndrome-related coronavirus
ALB08300	-0.0156907	-0.00205908	Middle East respiratory syndrome-related coronavirus
ANC28700	-0.0156907	-0.00205908	Middle East respiratory syndrome-related coronavirus
ALB08278	-0.0156907	-0.00205908	Middle East respiratory syndrome-related coronavirus
ALB08289	-0.0156907	-0.00205907	Middle East respiratory syndrome-related coronavirus
ANC28689	-0.0156906	-0.00205904	Middle East respiratory syndrome-related coronavirus
ALB08267	-0.0156906	-0.00205903	Middle East respiratory syndrome-related coronavirus
AIY60588	-0.0156878	-0.00205837	Middle East respiratory syndrome-related coronavirus
ASU45785	-0.0156878	-0.00205837	Middle East respiratory syndrome-related coronavirus
AIY60538	-0.0156878	-0.00205818	Middle East respiratory syndrome-related coronavirus
AIY60548	-0.0156878	-0.00205822	Middle East respiratory syndrome-related coronavirus
ASU45774	-0.0156878	-0.00205822	Middle East respiratory syndrome-related coronavirus
AIY60558	-0.0156878	-0.00205822	Middle East respiratory syndrome-related coronavirus
AIY60568	-0.0156878	-0.00205822	Middle East respiratory syndrome-related coronavirus
ASU45763	-0.0156878	-0.00205822	Middle East respiratory syndrome-related coronavirus
ASU45752	-0.0156878	-0.00205822	Middle East respiratory syndrome-related coronavirus
ASU45719	-0.0156877	-0.00205828	Middle East respiratory syndrome-related coronavirus
ASU45741	-0.0156877	-0.00205827	Middle East respiratory syndrome-related coronavirus
AFS88936	-0.0156859	-0.00202394	Middle East respiratory syndrome-related coronavirus
AYJ71470	-0.015685	-0.00196984	Middle East respiratory syndrome-related coronavirus
ALB08311	-0.0156847	-0.00205764	Middle East respiratory syndrome-related coronavirus
AHB33326	-0.015681	-0.0020956	Middle East respiratory syndrome-related coronavirus
QDP16206	-0.0156785	-0.00207813	Middle East respiratory syndrome-related coronavirus
ANC28711	-0.0156753	-0.00205137	Middle East respiratory syndrome-related coronavirus
AKS48062	-0.0156746	-0.00204926	Middle East respiratory syndrome-related coronavirus
AML60270	-0.0156735	-0.00204918	Middle East respiratory syndrome-related coronavirus
AIY60518	-0.0156717	-0.00204839	Middle East respiratory syndrome-related coronavirus
AKN24749	-0.0156712	-0.00200683	Middle East respiratory syndrome-related coronavirus
AKN24758	-0.0156712	-0.0020066	Middle East respiratory syndrome-related coronavirus
AKN24767	-0.0156712	-0.0020066	Middle East respiratory syndrome-related coronavirus
AKN24776	-0.0156712	-0.0020066	Middle East respiratory syndrome-related coronavirus
AKN24785	-0.0156712	-0.0020066	Middle East respiratory syndrome-related coronavirus
AKN24794	-0.0156712	-0.0020066	Middle East respiratory syndrome-related coronavirus
AID55073	-0.0156712	-0.00200666	Middle East respiratory syndrome-related coronavirus
AKN24821	-0.0156711	-0.0020065	Middle East respiratory syndrome-related coronavirus
AQZ41343	-0.0156667	-0.00205279	Middle East respiratory syndrome-related coronavirus
AQZ41311	-0.0156666	-0.00205302	Middle East respiratory syndrome-related coronavirus
AXG21665	-0.0156666	-0.00205308	Middle East respiratory syndrome-related coronavirus
AQZ41354	-0.0156666	-0.00205299	Middle East respiratory syndrome-related coronavirus
AMQ49059	-0.0156666	-0.00205299	Middle East respiratory syndrome-related coronavirus
AKK52612	-0.0156666	-0.00205299	Middle East respiratory syndrome-related coronavirus
ALW82680	-0.0156666	-0.00205299	Middle East respiratory syndrome-related coronavirus
AMQ49070	-0.0156666	-0.00205299	Middle East respiratory syndrome-related coronavirus
AKK52602	-0.0156666	-0.00205299	Middle East respiratory syndrome-related coronavirus
AMQ49048	-0.0156666	-0.00205299	Middle East respiratory syndrome-related coronavirus
ALW82669	-0.0156666	-0.00205299	Middle East respiratory syndrome-related coronavirus
AXN73481	-0.0156666	-0.00205299	Middle East respiratory syndrome-related coronavirus
ALW82731	-0.0156666	-0.00205299	Middle East respiratory syndrome-related coronavirus
AKK52592	-0.0156666	-0.00205299	Middle East respiratory syndrome-related coronavirus
AMQ49037	-0.0156666	-0.00205299	Middle East respiratory syndrome-related coronavirus
ALW82658	-0.0156666	-0.00205299	Middle East respiratory syndrome-related coronavirus
AXN73470	-0.0156666	-0.00205299	Middle East respiratory syndrome-related coronavirus
AXN73503	-0.0156666	-0.00205299	Middle East respiratory syndrome-related coronavirus
ALW82720	-0.0156666	-0.00205299	Middle East respiratory syndrome-related coronavirus
ATG84811	-0.0156666	-0.00205299	Middle East respiratory syndrome-related coronavirus
ATG84712	-0.0156666	-0.00205288	Middle East respiratory syndrome-related coronavirus
AKK52582	-0.0156666	-0.00205297	Middle East respiratory syndrome-related coronavirus
AQZ41365	-0.0156666	-0.00205298	Middle East respiratory syndrome-related coronavirus
AMQ49026	-0.0156666	-0.00205298	Middle East respiratory syndrome-related coronavirus
ALW82647	-0.0156665	-0.00205299	Middle East respiratory syndrome-related coronavirus
AXN73415	-0.0156665	-0.00205299	Middle East respiratory syndrome-related coronavirus
ARQ84757	-0.0156665	-0.00205302	Middle East respiratory syndrome-related coronavirus
QBF80510	-0.0156665	-0.00205295	Middle East respiratory syndrome-related coronavirus
AXN73492	-0.0156665	-0.00205296	Middle East respiratory syndrome-related coronavirus
ALW82709	-0.0156665	-0.00205295	Middle East respiratory syndrome-related coronavirus
ATG84844	-0.0156664	-0.0020527	Middle East respiratory syndrome-related coronavirus
AJD81451	-0.0156664	-0.00205287	Middle East respiratory syndrome-related coronavirus
ATY74381	-0.0156664	-0.00205274	Middle East respiratory syndrome-related coronavirus
ANF29239	-0.0156662	-0.00170633	Middle East respiratory syndrome-related coronavirus
AZK15900	-0.0156662	-0.00205289	Middle East respiratory syndrome-related coronavirus
ATG84756	-0.015664	-0.00191079	Middle East respiratory syndrome-related coronavirus
AKN24830	-0.0156634	-0.00203378	Middle East respiratory syndrome-related coronavirus
AXN73370	-0.0156621	-0.00197165	Middle East respiratory syndrome-related coronavirus
AXN73381	-0.015662	-0.00197154	Middle East respiratory syndrome-related coronavirus
QBF80554	-0.0156609	-0.00188879	Middle East respiratory syndrome-related coronavirus
AYO86699	-0.0156562	-0.00205137	Middle East respiratory syndrome-related coronavirus
AHZ58501	-0.0156549	-0.00199686	Middle East respiratory syndrome-related coronavirus
ARQ84735	-0.0156527	-0.00204478	Middle East respiratory syndrome-related coronavirus
AVK87461	-0.0156518	-0.00204578	Middle East respiratory syndrome-related coronavirus
ARQ84746	-0.015651	-0.00204556	Middle East respiratory syndrome-related coronavirus
AID50418	-0.0156509	-0.00204275	Middle East respiratory syndrome-related coronavirus
AKJ80137	-0.0156508	-0.00204285	Middle East respiratory syndrome-related coronavirus
ATG84822	-0.0156508	-0.00204897	Middle East respiratory syndrome-related coronavirus
AXN73459	-0.0156507	-0.00204301	Middle East respiratory syndrome-related coronavirus
ANF29162	-0.0156506	-0.00204366	Middle East respiratory syndrome-related coronavirus
AXN73448	-0.0156506	-0.00204589	Middle East respiratory syndrome-related coronavirus
AQZ41376	-0.0156504	-0.00204299	Middle East respiratory syndrome-related coronavirus
AWM99582	-0.0156502	-0.00204278	Middle East respiratory syndrome-related coronavirus
AHI48572	-0.0156501	-0.00204361	Middle East respiratory syndrome-related coronavirus
AXN73393	-0.0156499	-0.00204332	Middle East respiratory syndrome-related coronavirus
AMQ49015	-0.0156498	-0.00204311	Middle East respiratory syndrome-related coronavirus
AXN73404	-0.0156489	-0.00204362	Middle East respiratory syndrome-related coronavirus
ARQ84768	-0.0156481	-0.00204528	Middle East respiratory syndrome-related coronavirus
AHI48561	-0.015648	-0.00192103	Middle East respiratory syndrome-related coronavirus
AGV08455	-0.015648	-0.00192104	Middle East respiratory syndrome-related coronavirus
AHI48539	-0.0156479	-0.00192092	Middle East respiratory syndrome-related coronavirus
ASU45796	-0.0156476	-0.00209469	Middle East respiratory syndrome-related coronavirus
AID55071	-0.0156476	-0.00209472	Middle East respiratory syndrome-related coronavirus
AID55070	-0.0156476	-0.00209472	Middle East respiratory syndrome-related coronavirus
AID55072	-0.0156476	-0.00209472	Middle East respiratory syndrome-related coronavirus
AID55069	-0.0156476	-0.00209472	Middle East respiratory syndrome-related coronavirus
AID55068	-0.0156476	-0.00209472	Middle East respiratory syndrome-related coronavirus
AID55067	-0.0156476	-0.00209472	Middle East respiratory syndrome-related coronavirus
AID55066	-0.0156475	-0.00209485	Middle East respiratory syndrome-related coronavirus
ALX27243	-0.0156475	-0.0020946	Middle East respiratory syndrome-related coronavirus
ALW82636	-0.0156464	-0.00204842	Middle East respiratory syndrome-related coronavirus
AXN73426	-0.0156462	-0.00204945	Middle East respiratory syndrome-related coronavirus
AYJ71481	-0.0156461	-0.00196226	Middle East respiratory syndrome-related coronavirus
AQZ41322	-0.0156454	-0.0018772	Middle East respiratory syndrome-related coronavirus
AQZ41332	-0.0156442	-0.00205332	Middle East respiratory syndrome-related coronavirus
ASU45708	-0.0156424	-0.00213202	Middle East respiratory syndrome-related coronavirus
ASU45696	-0.0156414	-0.00213147	Middle East respiratory syndrome-related coronavirus
AYP10298	-0.0156329	-0.00208976	Middle East respiratory syndrome-related coronavirus
AYV64560	-0.0156328	-0.00208721	Middle East respiratory syndrome-related coronavirus
AYV64549	-0.0156323	-0.00208502	Middle East respiratory syndrome-related coronavirus
AGV08573	-0.0156271	-0.00206542	Middle East respiratory syndrome-related coronavirus
AGN70962	-0.0156271	-0.00206542	Middle East respiratory syndrome-related coronavirus
AGV08558	-0.0156271	-0.00206542	Middle East respiratory syndrome-related coronavirus
AGN70951	-0.0156271	-0.00206542	Middle East respiratory syndrome-related coronavirus
AGV08546	-0.0156271	-0.00206542	Middle East respiratory syndrome-related coronavirus
AGV08480	-0.0156271	-0.00206555	Middle East respiratory syndrome-related coronavirus
AGN70973	-0.0156271	-0.00206542	Middle East respiratory syndrome-related coronavirus
AGV08444	-0.015627	-0.00206541	Middle East respiratory syndrome-related coronavirus
AGV08535	-0.015627	-0.00206545	Middle East respiratory syndrome-related coronavirus
AXN92228	-0.0156261	-0.00166968	Middle East respiratory syndrome-related coronavirus
AIZ74433	-0.0156239	-0.0020069	Middle East respiratory syndrome-related coronavirus
AGV08467	-0.0156226	-0.0022385	Middle East respiratory syndrome-related coronavirus
AHI48605	-0.0156217	-0.00203162	Middle East respiratory syndrome-related coronavirus
AHI48594	-0.0156217	-0.00203167	Middle East respiratory syndrome-related coronavirus
AIZ74450	-0.0156212	-0.0019894	Middle East respiratory syndrome-related coronavirus
ANC28678	-0.0156152	-0.00200249	Middle East respiratory syndrome-related coronavirus
AHI48517	-0.015611	-0.00205558	Middle East respiratory syndrome-related coronavirus
QBF80587	-0.0156102	-0.00210272	Middle East respiratory syndrome-related coronavirus
QBF80576	-0.0156102	-0.00210257	Middle East respiratory syndrome-related coronavirus
AHE78108	-0.0156082	-0.00202371	Middle East respiratory syndrome-related coronavirus
AHN10812	-0.0156073	-0.00202346	Middle East respiratory syndrome-related coronavirus
AGN70929	-0.015607	-0.00206526	Middle East respiratory syndrome-related coronavirus
ATG84921	-0.015604	-0.00207262	Middle East respiratory syndrome-related coronavirus
ATG84910	-0.015604	-0.00207244	Middle East respiratory syndrome-related coronavirus
QBF80565	-0.0155939	-0.00209271	Middle East respiratory syndrome-related coronavirus
AGV08584	-0.0155932	-0.00237847	Middle East respiratory syndrome-related coronavirus
ATG84789	-0.0155926	-0.00194073	Middle East respiratory syndrome-related coronavirus
ATG84767	-0.0155925	-0.00194085	Middle East respiratory syndrome-related coronavirus
QEJ82226	-0.0155903	-0.00233704	Middle East respiratory syndrome-related coronavirus
QEJ82215	-0.0155902	-0.00233661	Middle East respiratory syndrome-related coronavirus
QBF80521	-0.0155852	-0.00199404	Middle East respiratory syndrome-related coronavirus
ANF29250	-0.015584	-0.00205782	Middle East respiratory syndrome-related coronavirus
ANF29184	-0.0155839	-0.00205795	Middle East respiratory syndrome-related coronavirus
AKL59401	-0.0155768	-0.00213571	Middle East respiratory syndrome-related coronavirus
ATG84778	-0.0155766	-0.00193396	Middle East respiratory syndrome-related coronavirus
ALB08257	-0.015576	-0.00199831	Middle East respiratory syndrome-related coronavirus
AHI48528	-0.0155756	-0.00190303	Middle East respiratory syndrome-related coronavirus
AZU90731	-0.015574	-0.00210175	Middle East respiratory syndrome-related coronavirus
AQZ41285	-0.0155725	-0.00217411	Middle East respiratory syndrome-related coronavirus
QBF80488	-0.0155704	-0.00219291	Middle East respiratory syndrome-related coronavirus
AGV08492	-0.0155696	-0.00183217	Middle East respiratory syndrome-related coronavirus
QDP16195	-0.0155694	-0.00224097	Middle East respiratory syndrome-related coronavirus
ALW82742	-0.0155615	-0.00195542	Middle East respiratory syndrome-related coronavirus
AXN73514	-0.0155583	-0.00201211	Middle East respiratory syndrome-related coronavirus
ANF29217	-0.0155582	-0.002012	Middle East respiratory syndrome-related coronavirus
ALB08246	-0.0155576	-0.00198117	Middle East respiratory syndrome-related coronavirus
AHI48583	-0.0155559	-0.00210547	Middle East respiratory syndrome-related coronavirus
QBF80499	-0.0155541	-0.00199838	Middle East respiratory syndrome-related coronavirus
ATG84734	-0.0155523	-0.00193347	Middle East respiratory syndrome-related coronavirus
ANF29228	-0.0155522	-0.00193344	Middle East respiratory syndrome-related coronavirus
AGV08408	-0.0155488	-0.00205471	Middle East respiratory syndrome-related coronavirus
ALW82691	-0.0155474	-0.00199999	Middle East respiratory syndrome-related coronavirus
AWU59321	-0.0155441	-0.00211231	Middle East respiratory syndrome-related coronavirus
ALX27232	-0.0155411	-0.00192822	Middle East respiratory syndrome-related coronavirus
ANF29206	-0.0155362	-0.00189234	Middle East respiratory syndrome-related coronavirus
ATG84745	-0.015536	-0.00189253	Middle East respiratory syndrome-related coronavirus
ATG84800	-0.0155358	-0.00192352	Middle East respiratory syndrome-related coronavirus
AFY13307	-0.0155355	-0.00208774	Middle East respiratory syndrome-related coronavirus
AGG22542	-0.0155344	-0.00208972	Middle East respiratory syndrome-related coronavirus
YP_007188579	-0.0155337	-0.00208844	Middle East respiratory syndrome-related coronavirus
AGV08379	-0.0155291	-0.00205055	Middle East respiratory syndrome-related coronavirus
AGV08390	-0.0155281	-0.00205365	Middle East respiratory syndrome-related coronavirus
AVK87450	-0.0155276	-0.00205696	Middle East respiratory syndrome-related coronavirus
ANF29173	-0.0155225	-0.00188526	Middle East respiratory syndrome-related coronavirus
ALW82753	-0.0155111	-0.00201655	Middle East respiratory syndrome-related coronavirus
AKN24812	-0.0155062	-0.0018811	Middle East respiratory syndrome-related coronavirus
ATG84877	-0.0155017	-0.00166515	Middle East respiratory syndrome-related coronavirus
AXN92260	-0.0154919	-0.00222961	Middle East respiratory syndrome-related coronavirus
AXN73525	-0.0154851	-0.00200554	Middle East respiratory syndrome-related coronavirus
ATG84866	-0.0154787	-0.00172411	Middle East respiratory syndrome-related coronavirus
ATG84888	-0.0154761	-0.00215826	Middle East respiratory syndrome-related coronavirus
AGN52936	-0.0154718	-0.00210791	Middle East respiratory syndrome-related coronavirus
AXN73437	-0.0154679	-0.00202683	Middle East respiratory syndrome-related coronavirus
ATG84679	-0.0154672	-0.00209396	Middle East respiratory syndrome-related coronavirus
ANF29261	-0.0154663	-0.00205979	Middle East respiratory syndrome-related coronavirus
ATG84899	-0.0154563	-0.00207451	Middle East respiratory syndrome-related coronavirus
ATG84723	-0.0154537	-0.0018315	Middle East respiratory syndrome-related coronavirus
ATG84855	-0.0154472	-0.00188267	Middle East respiratory syndrome-related coronavirus
QBF80543	-0.0154466	-0.00217251	Middle East respiratory syndrome-related coronavirus
AHZ64057	-0.0154259	-0.00210378	Middle East respiratory syndrome-related coronavirus
AJD81440	-0.0154229	-0.00189616	Middle East respiratory syndrome-related coronavirus
AIZ48760	-0.0154002	-0.00210992	Middle East respiratory syndrome-related coronavirus
AVK87340	-0.0153883	-0.001749	Middle East respiratory syndrome-related coronavirus
AVK87439	-0.0153868	-0.00170581	Middle East respiratory syndrome-related coronavirus
ATY74414	-0.0153813	-0.00171686	Middle East respiratory syndrome-related coronavirus
AXN92249	-0.0153812	-0.00171686	Middle East respiratory syndrome-related coronavirus
AVK87318	-0.0153812	-0.00171658	Middle East respiratory syndrome-related coronavirus
AVK87351	-0.0153811	-0.001717	Middle East respiratory syndrome-related coronavirus
AVK87406	-0.015381	-0.00171661	Middle East respiratory syndrome-related coronavirus
AVK87362	-0.015381	-0.00171662	Middle East respiratory syndrome-related coronavirus
AVK87329	-0.015381	-0.00171662	Middle East respiratory syndrome-related coronavirus
AVK87395	-0.015381	-0.00171662	Middle East respiratory syndrome-related coronavirus
ATY74392	-0.015381	-0.00171661	Middle East respiratory syndrome-related coronavirus
AVK87428	-0.015381	-0.00171661	Middle East respiratory syndrome-related coronavirus
AVK87373	-0.0153809	-0.00171658	Middle East respiratory syndrome-related coronavirus
AXN73359	-0.0153668	-0.00170853	Middle East respiratory syndrome-related coronavirus
ATY74403	-0.0153667	-0.00171116	Middle East respiratory syndrome-related coronavirus
AXN92238	-0.0153665	-0.00171175	Middle East respiratory syndrome-related coronavirus
AVK87384	-0.0153658	-0.0017079	Middle East respiratory syndrome-related coronavirus
QCQ29075	-0.0153395	-0.00215143	Middle East respiratory syndrome-related coronavirus
AMQ48993	-0.0153307	-0.00184305	Middle East respiratory syndrome-related coronavirus
AGH58717	-0.0152726	-0.00161486	Middle East respiratory syndrome-related coronavirus
ANF29272	-0.0152392	-0.00195862	Middle East respiratory syndrome-related coronavirus
AVK87417	-0.0151842	-0.00166475	Middle East respiratory syndrome-related coronavirus
QBF80598	-0.0151401	-0.00191727	Middle East respiratory syndrome-related coronavirus
AIZ74439	-0.0150318	-0.00245183	Middle East respiratory syndrome-related coronavirus
QHQ71963	0.00349052	0.00379341	Wuhan seafood market pneumonia virus
QHQ71973	0.00350555	0.0037979	Wuhan seafood market pneumonia virus
QHO62112	0.00350557	0.0037979	Wuhan seafood market pneumonia virus
QHO62877	0.00350557	0.0037979	Wuhan seafood market pneumonia virus
QHQ82464	0.00350557	0.0037979	Wuhan seafood market pneumonia virus
QHO62107	0.00350557	0.0037979	Wuhan seafood market pneumonia virus
QHD43416	0.00350557	0.00379791	Wuhan seafood market pneumonia virus
YP_009724390	0.00350796	0.00380386	Wuhan seafood market pneumonia virus
ACQ82725	0.00410851	0.00485005	Severe acute respiratory syndrome-related coronavirus
AAP41037	0.004132	0.00453482	Severe acute respiratory syndrome-related coronavirus
AYV99747	0.00418129	0.00461323	Severe acute respiratory syndrome-related coronavirus
AYV99775	0.00418129	0.00461328	Severe acute respiratory syndrome-related coronavirus
AYV99803	0.00418642	0.00461168	Severe acute respiratory syndrome-related coronavirus
AYV99761	0.00419099	0.00466354	Severe acute respiratory syndrome-related coronavirus
AYV99789	0.00419114	0.00466975	Severe acute respiratory syndrome-related coronavirus
AYV99817	0.0041941	0.00466242	Severe acute respiratory syndrome-related coronavirus
ADC35497	0.00423449	0.00442127	Severe acute respiratory syndrome-related coronavirus
ADC35483	0.00423763	0.00442468	Severe acute respiratory syndrome-related coronavirus
APT69869	0.00872365	0.0221569	Human coronavirus 229E
APT69862	0.00873254	0.0221464	Human coronavirus 229E
ARU07601	0.00874967	0.0214553	Human coronavirus 229E
APT69883	0.00878596	0.0214205	Human coronavirus 229E
ARB07392	0.00879069	0.0215421	Human coronavirus 229E
APT69856	0.00879357	0.0215188	Human coronavirus 229E
ARK08620	0.00879837	0.0215127	Human coronavirus 229E
APT69849	0.00881563	0.0214591	Human coronavirus 229E
ARK08642	0.00884007	0.0214945	Human coronavirus 229E
ARA15429	0.00897231	0.0213332	Human coronavirus 229E
QEG03785	0.00902055	0.0218558	Human coronavirus 229E
ARB07425	0.00904974	0.021483	Human coronavirus 229E
AOG74783	0.00912196	0.0215241	Human coronavirus 229E
QEO75985	0.00913221	0.0224275	Human coronavirus 229E
APT69876	0.00914568	0.0216811	Human coronavirus 229E
APT69890	0.009179	0.02185	Human coronavirus 229E
AGT21345	0.00921184	0.0209678	Human coronavirus 229E
AGT21360	0.0092686	0.0211828	Human coronavirus 229E
AST12964	0.00929607	0.0216396	Human coronavirus 229E
AGT21367	0.00935854	0.0212842	Human coronavirus 229E
AFR79257	0.0095438	0.0213153	Human coronavirus 229E
AFR79250	0.00957117	0.021866	Human coronavirus 229E
AGW27863	0.0111535	0.00359267	Human coronavirus HKU1
AAT98580	0.0111639	0.00365398	Human coronavirus HKU1
YP_173238	0.0111641	0.00365423	Human coronavirus HKU1
AGW27836	0.0111657	0.00356775	Human coronavirus HKU1
AGW27845	0.01117	0.00356439	Human coronavirus HKU1
AGW27854	0.01117	0.00356439	Human coronavirus HKU1
AGW27881	0.01117	0.00356398	Human coronavirus HKU1
ARB07617	0.0111708	0.0035641	Human coronavirus HKU1
AGW27872	0.0111741	0.0030079	Human coronavirus HKU1
ARB07599	0.0111774	0.00355447	Human coronavirus HKU1
ARB07608	0.0111774	0.00355447	Human coronavirus HKU1
ADN03339	0.0112779	0.00368351	Human coronavirus HKU1
AMN88686	0.0113585	0.00403517	Human coronavirus HKU1
QED88026	0.0113697	0.0242531	Human coronavirus NL63
AGT51345	0.0113951	0.0245769	Human coronavirus NL63
AGT51352	0.0115076	0.0245357	Human coronavirus NL63
AGT51359	0.0115076	0.0245357	Human coronavirus NL63
AGT51394	0.0115076	0.0245357	Human coronavirus NL63
AGT51338	0.011508	0.0245358	Human coronavirus NL63
AGT51387	0.011508	0.0245364	Human coronavirus NL63
AGT51373	0.0115083	0.0245359	Human coronavirus NL63
AGT51324	0.0115148	0.0245099	Human coronavirus NL63
AMN88694	0.0115811	0.0041307	Human coronavirus HKU1
ARE29979	0.0116011	0.0245297	Human coronavirus NL63
QED88012	0.0116035	0.0246853	Human coronavirus NL63
AGT17769	0.0116124	0.00330995	Human coronavirus HKU1
QED88019	0.0116164	0.0247101	Human coronavirus NL63
AWK59931	0.011653	0.024769	Human coronavirus NL63
AFQ55884	0.0116683	0.0247783	Human coronavirus NL63
AFO70497	0.0116687	0.024778	Human coronavirus NL63
AWK59967	0.0116688	0.0247791	Human coronavirus NL63
AWK59961	0.0116689	0.0247787	Human coronavirus NL63
AWK59955	0.0116731	0.0247885	Human coronavirus NL63
AWK59973	0.0116731	0.0247885	Human coronavirus NL63
AWK59949	0.0116731	0.0247885	Human coronavirus NL63
AWK59943	0.0116731	0.0247885	Human coronavirus NL63
AFD98820	0.011694	0.0249271	Human coronavirus NL63
APF29061	0.0117071	0.0244318	Human coronavirus NL63
APF29062	0.0117142	0.0244436	Human coronavirus NL63
APF29063	0.0117142	0.0244436	Human coronavirus NL63
ARB07406	0.0117613	0.0245402	Human coronavirus NL63
AFD98778	0.0117867	0.0245701	Human coronavirus NL63
QEG03731	0.0118002	0.0233003	Human coronavirus NL63
ANU06084	0.0118033	0.0245611	Human coronavirus NL63
APF29071	0.0118175	0.0245524	Human coronavirus NL63
AFD98834	0.0118189	0.0248268	Human coronavirus NL63
ALJ53431	0.0118193	0.024571	Human coronavirus NL63
QEG03748	0.0118516	0.0245318	Human coronavirus NL63
ARE29961	0.0118664	0.024509	Human coronavirus NL63
ARB07399	0.0118738	0.0244991	Human coronavirus NL63
AFD98799	0.0119178	0.0253442	Human coronavirus NL63
AFD98764	0.0119178	0.0253442	Human coronavirus NL63
AFD98792	0.0119178	0.0253439	Human coronavirus NL63
AFD98757	0.0119181	0.0253442	Human coronavirus NL63
AZS52618	0.0119301	0.00273627	Human coronavirus HKU1
ARU07594	0.0119362	0.0254151	Human coronavirus NL63
AFD98806	0.0119596	0.0247544	Human coronavirus NL63
AFD98813	0.0119596	0.024754	Human coronavirus NL63
ARE29967	0.0119708	0.0244009	Human coronavirus NL63
AFD98785	0.0119813	0.0248366	Human coronavirus NL63
AGT51331	0.0119896	0.0246835	Human coronavirus NL63
AGT51380	0.0120052	0.025465	Human coronavirus NL63
AFD98827	0.0120638	0.0244351	Human coronavirus NL63
QED88033	0.0121091	0.025523	Human coronavirus NL63
ARE29973	0.0121148	0.0245602	Human coronavirus NL63
ARK08627	0.0121225	0.0245371	Human coronavirus NL63
ARE29985	0.0121236	0.0245368	Human coronavirus NL63
QED88040	0.0121338	0.025747	Human coronavirus NL63
AVA26873	0.0121647	0.0254019	Human coronavirus NL63
AYN64561	0.012181	0.00313851	Human coronavirus HKU1
AFD98771	0.0122042	0.024939	Human coronavirus NL63
ARB07438	0.0122655	0.00316733	Human coronavirus HKU1
AFD98750	0.0123369	0.0253538	Human coronavirus NL63
AGT51366	0.0123404	0.02477	Human coronavirus NL63
ACT11030	0.0190486	-0.00626308	Betacoronavirus 1
ACJ35486	0.0191226	-0.00633132	Betacoronavirus 1
AIV41837	0.0192292	-0.00993021	Betacoronavirus 1
AIV41897	0.0194715	-0.00991317	Betacoronavirus 1
AJC98135	0.0194812	-0.00997022	Betacoronavirus 1
ARK08670	0.0195564	-0.00978318	Betacoronavirus 1
AIV41777	0.019583	-0.00982315	Betacoronavirus 1
ATP16767	0.0196249	-0.00984457	Betacoronavirus 1
ATP16757	0.0196256	-0.00980677	Betacoronavirus 1
AGT51561	0.0196378	-0.00985176	Betacoronavirus 1
AIV41783	0.0196595	-0.00941802	Betacoronavirus 1
AGT51541	0.0196717	-0.0100282	Betacoronavirus 1
AVQ05264	0.0196736	-0.00983642	Betacoronavirus 1
AGT51610	0.0197276	-0.00994697	Betacoronavirus 1
AGT51531	0.0197316	-0.00989923	Betacoronavirus 1
AGT51730	0.0197316	-0.00989939	Betacoronavirus 1
AGT51451	0.019732	-0.00989987	Betacoronavirus 1
AGT51461	0.0197381	-0.00994936	Betacoronavirus 1
AGT51471	0.0197381	-0.0099494	Betacoronavirus 1
AGT51660	0.019739	-0.00994984	Betacoronavirus 1
AMK59677	0.0197415	-0.008709	Betacoronavirus 1
AGT51422	0.0197514	-0.00996276	Betacoronavirus 1
AGT51551	0.0197659	-0.00986265	Betacoronavirus 1
AGT51710	0.0197667	-0.00986284	Betacoronavirus 1
AGT51780	0.0197667	-0.00986264	Betacoronavirus 1
QEG03803	0.0197766	-0.00959887	Betacoronavirus 1
AGT51412	0.0197794	-0.010074	Betacoronavirus 1
AIV41795	0.0197851	-0.00996405	Betacoronavirus 1
AGT51670	0.0197923	-0.0100876	Betacoronavirus 1
AGT51580	0.0197931	-0.0100876	Betacoronavirus 1
AGT51640	0.0197931	-0.0100879	Betacoronavirus 1
AGT51590	0.019846	-0.00991765	Betacoronavirus 1
AJC98127	0.0199114	-0.00977362	Betacoronavirus 1
AGT51680	0.0199691	-0.0099635	Betacoronavirus 1
AIV41789	0.0200097	-0.0092521	Betacoronavirus 1
QEG03776	0.0200408	-0.00977359	Betacoronavirus 1
AIV41831	0.0201012	-0.0103207	Betacoronavirus 1
AIV41849	0.0201104	-0.00967077	Betacoronavirus 1
QEG03740	0.0205241	-0.00996127	Betacoronavirus 1
AGT51521	0.02055	-0.00960795	Betacoronavirus 1
QDH43719	0.0205543	-0.0100141	Betacoronavirus 1
AGT51720	0.0205962	-0.00983154	Betacoronavirus 1
AGT51690	0.0205964	-0.00983161	Betacoronavirus 1
QEG03757	0.0206384	-0.0101936	Betacoronavirus 1
AQN78776	0.0206519	-0.0100277	Betacoronavirus 1
QEG03767	0.0206614	-0.0100913	Betacoronavirus 1
QEG03794	0.0206616	-0.0099906	Betacoronavirus 1
AQN78656	0.0206702	-0.00980592	Betacoronavirus 1
AVR40342	0.020677	-0.0100306	Betacoronavirus 1
QEG03814	0.0206879	-0.0101165	Betacoronavirus 1
AGT51481	0.0206892	-0.0103218	Betacoronavirus 1
AQN78672	0.0206896	-0.00987733	Betacoronavirus 1
AGT51600	0.0206918	-0.0101008	Betacoronavirus 1
AQN78768	0.0206935	-0.00996516	Betacoronavirus 1
AGT51511	0.0206963	-0.0102698	Betacoronavirus 1
AGT51790	0.0207236	-0.0102177	Betacoronavirus 1
AIV41885	0.0207316	-0.0098915	Betacoronavirus 1
AGT51620	0.0207333	-0.0103622	Betacoronavirus 1
AGT51570	0.0207437	-0.00988297	Betacoronavirus 1
AGT51491	0.0207482	-0.0103205	Betacoronavirus 1
AGT51700	0.0207536	-0.0102898	Betacoronavirus 1
AGT51770	0.0207557	-0.0100189	Betacoronavirus 1
AGT51760	0.0207558	-0.0100191	Betacoronavirus 1
AGT51750	0.0207571	-0.0102427	Betacoronavirus 1
AGT51630	0.0207579	-0.010243	Betacoronavirus 1
AIV41855	0.0208264	-0.00973563	Betacoronavirus 1
AEN19358	0.0208307	-0.00979078	Betacoronavirus 1
AQN78720	0.020836	-0.00990429	Betacoronavirus 1
AQN78704	0.020836	-0.00990429	Betacoronavirus 1
AQN78752	0.020836	-0.00990424	Betacoronavirus 1
ARK08635	0.0208749	-0.00997874	Betacoronavirus 1
AIV41861	0.0208966	-0.00976052	Betacoronavirus 1
AGT51650	0.0209503	-0.0105499	Betacoronavirus 1
ARE30008	0.0209532	-0.0101206	Betacoronavirus 1
AGT51501	0.0209606	-0.0104912	Betacoronavirus 1
AIV41987	0.0209717	-0.0101242	Betacoronavirus 1
AIV41915	0.0209823	-0.0100943	Betacoronavirus 1
AIV41813	0.0209823	-0.0100943	Betacoronavirus 1
AIV41951	0.0209824	-0.0100944	Betacoronavirus 1
AWW13566	0.020988	-0.0101933	Betacoronavirus 1
AIV41903	0.0209882	-0.0100283	Betacoronavirus 1
AIV41909	0.020991	-0.0100974	Betacoronavirus 1
AIV41921	0.0209984	-0.0100801	Betacoronavirus 1
AIV41993	0.0210069	-0.0101349	Betacoronavirus 1
AIX09807	0.0210162	-0.010072	Betacoronavirus 1
AIV41801	0.0210202	-0.0100644	Betacoronavirus 1
AIV41867	0.021021	-0.0100643	Betacoronavirus 1
AIV41927	0.0210211	-0.0100645	Betacoronavirus 1
AIV41807	0.0210211	-0.0100645	Betacoronavirus 1
AIV41933	0.0210211	-0.0100645	Betacoronavirus 1
AIV41939	0.0210211	-0.0100645	Betacoronavirus 1
AIV41981	0.0210211	-0.0100645	Betacoronavirus 1
AIV41975	0.0210212	-0.0100645	Betacoronavirus 1
AIV41825	0.0210212	-0.0100643	Betacoronavirus 1
AIV42005	0.0210273	-0.00999643	Betacoronavirus 1
AIV41963	0.0210323	-0.00992825	Betacoronavirus 1
ARB07433	0.021038	-0.0101029	Betacoronavirus 1
AIV41945	0.0210416	-0.0101612	Betacoronavirus 1
ARE30017	0.0210464	-0.0101101	Betacoronavirus 1
AWW13575	0.0210716	-0.00963676	Betacoronavirus 1
ARK08661	0.0210809	-0.0102102	Betacoronavirus 1
AIV41969	0.0210818	-0.0100319	Betacoronavirus 1
AIV42011	0.0210874	-0.0100175	Betacoronavirus 1
AVR40344	0.0210879	-0.0103142	Betacoronavirus 1
AGT51441	0.0210971	-0.0104763	Betacoronavirus 1
ATN39872	0.0211092	-0.01024	Betacoronavirus 1
AIX09799	0.0211143	-0.0101143	Betacoronavirus 1
AIV41819	0.0211212	-0.00975347	Betacoronavirus 1
AIV41957	0.0211315	-0.00992134	Betacoronavirus 1
AGT51800	0.0211377	-0.0104582	Betacoronavirus 1
AEN19366	0.0211436	-0.00983736	Betacoronavirus 1
ARK08651	0.02115	-0.01032	Betacoronavirus 1
AZP73840	0.0211675	-0.0103455	Betacoronavirus 1
ARU07610	0.0211686	-0.0103442	Betacoronavirus 1
APU51916	0.0211703	-0.010336	Betacoronavirus 1
ARU07568	0.0211703	-0.0103365	Betacoronavirus 1
ARU07587	0.0211723	-0.0103535	Betacoronavirus 1
ARB07414	0.0211754	-0.00986394	Betacoronavirus 1
ARB07420	0.0211776	-0.00986165	Betacoronavirus 1
APU51926	0.0211794	-0.0103599	Betacoronavirus 1
ARE29999	0.0211844	-0.00988717	Betacoronavirus 1
ARE29990	0.0211846	-0.00988735	Betacoronavirus 1
AIV41873	0.021188	-0.00969573	Betacoronavirus 1
AIV41891	0.0211973	-0.00987232	Betacoronavirus 1
AIV41999	0.0212078	-0.00967951	Betacoronavirus 1
AOL02453	0.021222	-0.00997456	Betacoronavirus 1
ARA15421	0.0212304	-0.0103627	Betacoronavirus 1
ARK08679	0.0212386	-0.0101731	Betacoronavirus 1
APU51936	0.021258	-0.0103321	Betacoronavirus 1
AQN78736	0.021277	-0.00997592	Betacoronavirus 1
AQN78664	0.0214059	-0.00996768	Betacoronavirus 1
AQN78728	0.021406	-0.00996775	Betacoronavirus 1
AQN78712	0.021406	-0.00996775	Betacoronavirus 1
AQN78760	0.021406	-0.00996775	Betacoronavirus 1
AQN78696	0.0214064	-0.0099678	Betacoronavirus 1
AQN78688	0.0214064	-0.00996773	Betacoronavirus 1
AQN78680	0.0214132	-0.00987807	Betacoronavirus 1
AIV41843	0.0214232	-0.00994541	Betacoronavirus 1
AQN78744	0.021507	-0.00988887	Betacoronavirus 1
AIV41879	0.0215122	-0.00994313	Betacoronavirus 1
